# Supplementary material for: Avenue to novel o -carboranyl boron compounds – reactivity study of o -carborane-fused aminoborirane towards organic azides
Source: Royal Society of Chemistry journal article supplement (doi:10.1039/d4sc00489b), 2024-01-01
Supplement: d4sc00489b1.pdf [file d4sc00489b1.pdf]

## Electronic Supplementary Information

### **Avenue to Novel *o*-Carboranyl Boron Compounds – Reactivity Study of *o*-Carborane-Fused Aminoborirane towards Organic Azides**

#### Table of Contents

|                               |    |
|-------------------------------|----|
| Experimental Procedures ..... | 2  |
| Crystal structures .....      | 22 |
| Computational details .....   | 25 |
| Cartesian coordinates .....   | 28 |
| References .....              | 49 |

## Experimental Procedures

**General considerations.** All manipulations were conducted either under an atmosphere of dry argon or in *vacuo* using standard Schlenk line or glovebox techniques. Solvents were purified by distillation from Na/K under dry argon. C<sub>6</sub>D<sub>6</sub> was degassed by three freeze-pump-thaw cycles and stored over molecular sieves. Borirane **1** was prepared according to published procedures.<sup>1</sup> Note: Starting material **1** is sensitive to volatile ether solvents such as THF and Et<sub>2</sub>O.<sup>2</sup> The presence of catalytic amounts of ether in the solvent or atmosphere during the synthesis of **2-4** may result in the formation of by-products.

NMR spectra were acquired on a Bruker Avance 400 (<sup>1</sup>H: 400.1 MHz, <sup>11</sup>B: 128.4 MHz, <sup>13</sup>C: 100.6 MHz) NMR spectrometer at 298 K without mentioned. <sup>1</sup>H, <sup>13</sup>C{<sup>1</sup>H} and <sup>1</sup>H{<sup>11</sup>B} spectra were referenced to external TMS. <sup>11</sup>B and <sup>11</sup>B{<sup>1</sup>H} NMR spectra were referenced to external BF<sub>3</sub>·OEt<sub>2</sub>. High resolution mass spectrometry (HRMS) was performed with a Thermo Fisher Scientific Q-Exactive MS System. Elemental analysis (C, H, N) was performed on a vario micro cube CHNS analyzer.

### Synthetic protocols for **2**

#### Synthesis of **2a**

DippN<sub>3</sub> (65 mg, 0.32 mmol, 1.0 eq.) was added to **1** (100 mg, 0.32 mmol) in 2 mL benzene at room temperature. After heating to 60 °C for 4 hours, the reaction system was cooled to room temperature and all volatiles were removed under vacuum to obtain a colorless solid. Analytically pure product (132 mg, 0.26 mmol, 80%) was isolated as colorless block crystals by slowly evaporating a saturated pentane solution of **2a** at -35 °C in the refrigerator of glovebox for 24 hours.

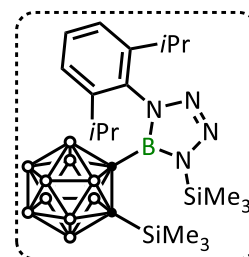

**<sup>1</sup>H NMR** (C<sub>6</sub>D<sub>6</sub>): δ = 7.25 (*t*, *J* = 7.8 Hz, 1H, H of Ph), 7.11 (*dd*, *J* = 7.8, 1.4 Hz, 1H, H of Ph), 7.03 (*dd*, *J* = 7.7, 1.4 Hz, 1H, H of Ph), 3.81 to 2.26 (*m*, 10H, *BH*), 3.00 (*hept*, *J* = 6.8 Hz, 1H, CH(CH<sub>3</sub>)<sub>2</sub>), 2.04 (*hept*, *J* = 6.8 Hz, 1H, CH(CH<sub>3</sub>)<sub>2</sub>), 1.23 (*d*, *J* = 6.9 Hz, 3H, CH(CH<sub>3</sub>)<sub>2</sub>), 1.19 (*d*, *J* = 6.9 Hz, 3H, CH(CH<sub>3</sub>)<sub>2</sub>), 1.18 (*d*, *J* = 6.8 Hz, 3H, CH(CH<sub>3</sub>)<sub>2</sub>), 1.01 (*d*, *J* = 6.8 Hz, 3H, CH(CH<sub>3</sub>)<sub>2</sub>), 0.49 (*s*, 9H, SiMe<sub>3</sub>), -0.04 (*s*, 9H, SiMe<sub>3</sub>); **<sup>1</sup>H{<sup>11</sup>B} NMR** (C<sub>6</sub>D<sub>6</sub>): δ = 7.23 (*t*, *J* = 7.8 Hz, 1H, H of Ph), 7.11 (*d*, *J* = 7.7, 1H, H of Ph), 7.04 (*d*, *J* = 7.7, 1H, H of Ph), 3.15 (*s*, 1H, *BH*), 3.08 (*s*, 2H, *BH*), 3.01 (*hept*, *J* = 6.9 Hz, 1H, CH(CH<sub>3</sub>)<sub>2</sub>), 2.86 (*s*, 1H, *BH*), 2.83 (*s*, 1H, *BH*), 2.56 (*s*, 1H, *BH*), 2.46 (*s*, 1H, *BH*), 2.37 (*s*, 1H, *BH*), 2.27 (*s*, 1H, *BH*), 2.15 (*s*, 1H, *BH*), 2.04 (*hept*, *J* = 6.8 Hz, 1H, CH(CH<sub>3</sub>)<sub>2</sub>), 1.23 (*d*, *J* = 6.9 Hz, 3H, CH(CH<sub>3</sub>)<sub>2</sub>), 1.19 (*d*, *J* = 6.9 Hz, 3H, CH(CH<sub>3</sub>)<sub>2</sub>), 1.18 (*d*, *J* = 6.9 Hz, 3H, CH(CH<sub>3</sub>)<sub>2</sub>), 1.01 (*d*, *J* = 6.9 Hz, 3H, CH(CH<sub>3</sub>)<sub>2</sub>), 0.50 (*s*, 9H, SiMe<sub>3</sub>), -0.03 (*s*, 9H, SiMe<sub>3</sub>); **<sup>11</sup>B NMR** (C<sub>6</sub>D<sub>6</sub>): δ = 26.9 (*s*, CbBN<sub>4</sub>), 1.8 (*d*, *J* = 140.9 Hz, B<sub>Cb</sub>), -3.8 (*d*, *J* = 106.1 Hz, B<sub>Cb</sub>), -9.2 to -12.1 (*m*, B<sub>Cb</sub>); **<sup>11</sup>B{<sup>1</sup>H} NMR** (C<sub>6</sub>D<sub>6</sub>): δ = 27.0 (*s*, CbBN<sub>4</sub>), 1.8 (*s*, B<sub>Cb</sub>), -3.9 (*s*, B<sub>Cb</sub>), -8.7 (*s*, B<sub>Cb</sub>), -11.8 (*s*, B<sub>Cb</sub>); **<sup>13</sup>C{<sup>1</sup>H} NMR** (C<sub>6</sub>D<sub>6</sub>): δ = 148.1 (C of Ph), 145.4 (C of Ph), 135.0 (C of Ph), 130.4 (C of Ph), 124.3 (C of Ph), 123.6 (C of Ph), 76.5 (CSiMe<sub>3</sub>), 29.7 (CH(CH<sub>3</sub>)<sub>2</sub>), 29.6 (CH(CH<sub>3</sub>)<sub>2</sub>), 26.2 (CH(CH<sub>3</sub>)<sub>2</sub>), 25.6 (CH(CH<sub>3</sub>)<sub>2</sub>), 21.4 (CH(CH<sub>3</sub>)<sub>2</sub>), 2.7 (SiMe<sub>3</sub>), 0.4 (SiMe<sub>3</sub>); **HRMS (m/z):** [M+H]<sup>+</sup> calcd. for C<sub>20</sub>H<sub>46</sub>N<sub>4</sub>B<sub>11</sub>Si<sub>2</sub>, 519.42791; found 519.42828; **Elemental analysis:** calcd. for C<sub>20</sub>H<sub>45</sub>B<sub>11</sub>N<sub>4</sub>Si<sub>2</sub>, C, 46.49; H, 8.78; N, 10.84; found C, 46.59; H, 8.84; N, 10.86.

## Synthesis of 2b

2,6-Dichlorophenylazide (56 mg, 0.30 mmol, 1.0 eq.) was added to **1** (94 mg, 0.30 mmol) in 2 mL benzene at room temperature. After heating to 100 °C for 2 days, the reaction system was cooled to room temperature and all volatiles were removed under vacuum to obtain a yellow solid. Analytically pure product (115 mg, 0.23 mmol, 77%) was isolated as yellow block crystals by slowly evaporating a saturated pentane solution of **2b** at -35 °C in the refrigerator of glovebox for 24 hours.

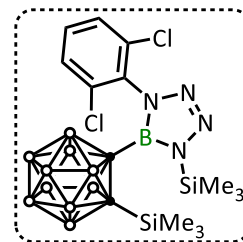

**<sup>1</sup>H NMR** (C<sub>6</sub>D<sub>6</sub>): δ = 6.82 (*dd*, *J* = 8.2, 1.3 Hz, 1H, H of Ph), 6.73 (*dd*, *J* = 8.2, 1.3 Hz, 1H, H of Ph), 6.37 (*t*, *J* = 8.1 Hz, 1H, H of Ph), 3.15 to 2.37 (*m*, 10H, *BH*), 0.48 (*s*, 9H, *SiMe*<sub>3</sub>), 0.00 (*s*, 9H, *SiMe*<sub>3</sub>); **<sup>1</sup>H{<sup>11</sup>B} NMR** (C<sub>6</sub>D<sub>6</sub>): δ = 6.82 (*dd*, *J* = 8.2, 1.3 Hz, 1H, H of Ph), 6.73 (*dd*, *J* = 8.2, 1.3 Hz, 1H, H of Ph), 6.37 (*t*, *J* = 8.1 Hz, 1H, H of Ph), 3.15 (*s*, 3H, *BH*), 2.91 (*s*, 1H, *BH*), 2.78 (*s*, 1H, *BH*), 2.67 (*s*, 1H, *BH*), 2.48 (*s*, 2H, *BH*), 2.37 (*s*, 2H, *BH*), 0.48 (*s*, 9H, *SiMe*<sub>3</sub>), 0.00 (*s*, 9H, *SiMe*<sub>3</sub>); **<sup>11</sup>B NMR** (C<sub>6</sub>D<sub>6</sub>): δ = 27.1 (*s*, CbBN<sub>4</sub>), 1.8 (*d*, *J* = 146.9 Hz, *B*<sub>Cb</sub>), -3.9 (*d*, *J* = 136.4 Hz, *B*<sub>Cb</sub>), -8.9 to -12.1 (*m*, *B*<sub>Cb</sub>); **<sup>11</sup>B{<sup>1</sup>H} NMR** (C<sub>6</sub>D<sub>6</sub>): δ = 27.2 (*s*, CbBN<sub>4</sub>), 1.9 (*s*, *B*<sub>Cb</sub>), -3.9 (*s*, *B*<sub>Cb</sub>), -8.6 (*s*, *B*<sub>Cb</sub>), -11.7 (*s*, *B*<sub>Cb</sub>); **<sup>13</sup>C{<sup>1</sup>H} NMR** (C<sub>6</sub>D<sub>6</sub>): δ = 135.0 (C of Ph), 132.5 (C of Ph), 132.3 (C of Ph), 128.6 (C of Ph), 126.7 (C of Ph), 126.6 (C of Ph), 74.5 (CSiMe<sub>3</sub>), 0.2 (SiMe<sub>3</sub>), -2.0 (SiMe<sub>3</sub>); **HRMS (LIFDI)**: calcd. for C<sub>14</sub>H<sub>31</sub>B<sub>11</sub>Cl<sub>2</sub>N<sub>4</sub>Si<sub>2</sub>: *m/z* = 500.2561; found: *m/z* = 500.2555.

## Synthesis of 2c

2,4,6-trisbromophenylazide (110 mg, 0.30 mmol, 1.0 eq.) was added to **1** (94 mg, 0.30 mmol) in 2 mL benzene at room temperature. After heating to 100 °C for 2 days, the reaction system was cooled to room temperature and all volatiles were removed under vacuum to obtain **2c** as a beige oil (127 mg, 0.19 mmol, 63%).

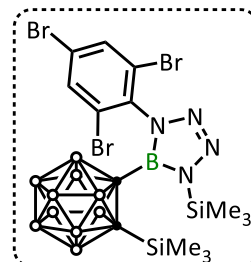

**<sup>1</sup>H NMR** (C<sub>6</sub>D<sub>6</sub>): δ = 7.24 (*d*, *J* = 2.1 Hz, 1H, H of Ph), 7.14 (*d*, *J* = 2.1 Hz, 1H, H of Ph), 3.15 to 2.34 (*m*, 10H, *BH*), 0.49 (*s*, 9H, *SiMe*<sub>3</sub>), 0.00 (*s*, 9H, *SiMe*<sub>3</sub>); **<sup>1</sup>H{<sup>11</sup>B} NMR** (C<sub>6</sub>D<sub>6</sub>): δ = 7.25 (*d*, *J* = 2.0 Hz, 1H, H of Ph), 7.15 (*d*, *J* = 2.0 Hz, 1H, H of Ph), 3.15 (*s*, 3H, *BH*), 2.88 (*s*, 1H, *BH*), 2.77 (*s*, 1H, *BH*), 2.61 (*s*, 1H, *BH*), 2.47 (*s*, 1H, *BH*), 2.38 (*s*, 1H, *BH*), 2.34 (*s*, 2H, *BH*), 0.49 (*s*, 9H, *SiMe*<sub>3</sub>), 0.09 (*s*, 9H, *SiMe*<sub>3</sub>); **<sup>11</sup>B NMR** (C<sub>6</sub>D<sub>6</sub>): δ = 27.1 (*s*, CbBN<sub>4</sub>), 1.9 (*d*, *J* = 139.3 Hz, *B*<sub>Cb</sub>), -3.8 (*d*, *J* = 117.8 Hz, *B*<sub>Cb</sub>), -8.6 to -11.4 (*m*, *B*<sub>Cb</sub>); **<sup>11</sup>B{<sup>1</sup>H} NMR** (C<sub>6</sub>D<sub>6</sub>): δ = 26.7 (*s*, CbBN<sub>4</sub>), 1.9 (*s*, *B*<sub>Cb</sub>), -3.7 (*s*, *B*<sub>Cb</sub>), -8.7 (*s*, *B*<sub>Cb</sub>), -11.7 (*s*, *B*<sub>Cb</sub>); **<sup>13</sup>C{<sup>1</sup>H} NMR** (C<sub>6</sub>D<sub>6</sub>): δ = 134.2 (C of Ph), 133.2 (C of Ph), 133.0 (C of Ph), 126.5 (C of Ph), 122.4 (C of Ph), 122.1 (C of Ph), 74.6 (CSiMe<sub>3</sub>), 0.2 (SiMe<sub>3</sub>), -1.7 (SiMe<sub>3</sub>); **HRMS (LIFDI)**: calcd. for C<sub>14</sub>H<sub>30</sub>B<sub>11</sub>Br<sub>3</sub>N<sub>4</sub>Si<sub>2</sub>: *m/z* = 669.0661; found: *m/z* = 669.0606.

## Synthesis of 2d

Pentafluorophenylazide (68 mg, 0.3 mmol, 1.0 eq.) was added to **1** (94 mg, 0.3 mmol) in 2 mL benzene at room temperature. After heating to 100 °C for 24 hours, the reaction system was cooled to room temperature and all volatiles were removed under vacuum to obtain a yellowish brown oil of **2d** (83 mg, 0.16 mmol, 54%).

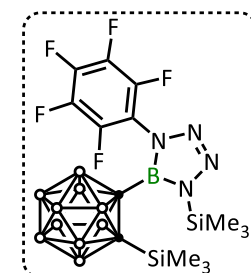

**<sup>1</sup>H NMR** (C<sub>6</sub>D<sub>6</sub>): δ = 3.14 to 2.07 (*m*, 10H, *BH*), 0.38 (*s*, 9H, *SiMe*<sub>3</sub>), -0.14 (*s*, 9H, *SiMe*<sub>3</sub>); **<sup>1</sup>H{<sup>11</sup>B} NMR** (C<sub>6</sub>D<sub>6</sub>): δ = 3.15 (*s*, 1H, *BH*), 3.11 (*s*, 2H, *BH*), 2.96 (*s*, 2H, *BH*), 2.64 (*s*, 1H,

BH), 2.58 (s, 1H, BH), 2.44 (s, 1H, BH), 2.35 (s, 1H, BH), 2.30 (s, 1H, BH), 2.07 (s, 1H, BH), 0.39 (s, 9H, SiMe<sub>3</sub>), -0.14 (s, 9H, SiMe<sub>3</sub>); **<sup>11</sup>B NMR** (C<sub>6</sub>D<sub>6</sub>): δ = 27.1 (s, CbBN<sub>4</sub>), 2.0 (d, J = 140.9 Hz, B<sub>Cb</sub>), -3.9 (d, J = 106.1 Hz, B<sub>Cb</sub>), -8.52 to -11.6 (m, B<sub>Cb</sub>); **<sup>11</sup>B{<sup>1</sup>H} NMR** (C<sub>6</sub>D<sub>6</sub>): δ = 27.1 (s, CbBN<sub>4</sub>), 2.0 (s, B<sub>Cb</sub>), -2.1 (s, B<sub>Cb</sub>), -4.0 (s, B<sub>Cb</sub>), -9.1 (s, B<sub>Cb</sub>), -12.2 (s, B<sub>Cb</sub>); **<sup>13</sup>C{<sup>1</sup>H} NMR** (C<sub>6</sub>D<sub>6</sub>): δ = 129.3 (C of Ph), 128.6 (C of Ph), 127.5 (C of Ph), 125.7 (C of Ph), 76.1 (CSiMe<sub>3</sub>), 2.2 (SiMe<sub>3</sub>), -0.6 (SiMe<sub>3</sub>); **<sup>19</sup>F NMR** (C<sub>6</sub>D<sub>6</sub>): δ = -143.0, -143.7, -149.6, -160.1, -161.5; **HRMS (LIFDI)**: calcd. for C<sub>14</sub>H<sub>28</sub>B<sub>11</sub>F<sub>5</sub>N<sub>4</sub>Si<sub>2</sub>: m/z = 522.2869; found: m/z = 522.2863.

### Synthesis of 3

BnN<sub>3</sub> (21 mg, 0.16 mmol, 0.5 eq.) in 1 mL toluene was added into **1** (100 mg, 0.32 mmol) in 1 mL toluene at room temperature. After mixing thoroughly, the reaction system was stored at -35 °C for 24 h. Analytically pure product (80 mg, 0.11 mmol, 66 %) was isolated as colourless crystals.

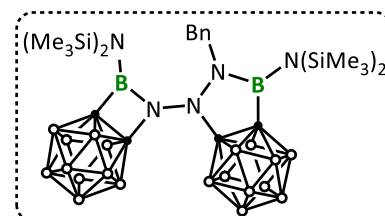

**<sup>1</sup>H NMR** (toluene-d<sub>8</sub>): δ = 7.25 to 7.23 (m, 2H, H of Ph), 7.06 to 7.01 (m, 3H, H of Ph), 4.26 (dd, J = 36.5, 16.3 Hz, 2H, CH<sub>2</sub>), 3.64 to 2.21 (m, 20H, BH), 0.26 (s, 9H, SiMe<sub>3</sub>), 0.13 (s, 18H, SiMe<sub>3</sub>), -0.15 (s, 9H, SiMe<sub>3</sub>); **<sup>1</sup>H{<sup>11</sup>B} NMR** (toluene-d<sub>8</sub>): δ = 7.25 to 7.23 (m, 2H, H of Ph), 7.06 to 6.99 (m, 3H, H of Ph), 4.27 (dd, J = 36.3, 16.3 Hz, 2H, CH<sub>2</sub>), 3.55 (s, 1H, BH), 3.45 (s, 1H, BH), 3.21 (s, 1H, BH), 3.15 (s, 1H, BH), 3.04 (s, 1H, BH), 2.92 (s, 2H, BH), 2.82 to 2.67 (m, 8H, BH), 2.60 (s, 1H, BH), 2.50 (s, 1H, BH), 2.39 (s, 2H, BH), 2.26 (s, 1H, BH), 0.26 (s, 9H, SiMe<sub>3</sub>), 0.13 (s, 18H, SiMe<sub>3</sub>), -0.15 (s, 9H, SiMe<sub>3</sub>); **<sup>11</sup>B NMR** (toluene-d<sub>8</sub>): δ = 34.7 (br, CbBN), 2.9 to -11.4 (m, B<sub>Cb</sub>); **<sup>11</sup>B{<sup>1</sup>H} NMR** (toluene-d<sub>8</sub>): δ = 34.7 (br, CbBN), 2.5 (s, B<sub>Cb</sub>), -2.6 (s, B<sub>Cb</sub>), -4.4 (s, B<sub>Cb</sub>), -8.8 (s, B<sub>Cb</sub>), -11.3 (s, B<sub>Cb</sub>); **<sup>13</sup>C{<sup>1</sup>H} NMR** (toluene-d<sub>8</sub>): δ = 138.0 (C of Ph), 137.5 (C of Ph), 128.7 (C of Ph), 128.4 (C of Ph), 91.1 (C<sub>Cb</sub>N), 90.7 (C<sub>Cb</sub>N), 50.2 (CH<sub>2</sub>), 4.6 (SiMe<sub>3</sub>), 4.2 (SiMe<sub>3</sub>), 3.7 (SiMe<sub>3</sub>); **HRMS (m/z)**: [M+H]<sup>+</sup> calcd. for C<sub>23</sub>H<sub>64</sub>N<sub>5</sub>B<sub>22</sub>Si<sub>4</sub>, 764.62805; found 764.63464; **Elemental analysis**: calcd. for C<sub>23</sub>H<sub>63</sub>B<sub>22</sub>N<sub>5</sub>Si<sub>4</sub>, C, 36.35; H, 8.36; N, 9.22; found C, 36.50; H, 8.43; N, 9.07.

### Synthesis of 4

Me<sub>3</sub>SiN<sub>3</sub> (40 mg, 0.35 mmol, 1.1 eq) was added to **1** (100 mg, 0.32 mmol) in 2 mL toluene at room temperature. The reaction system was heated to 110 °C under reduced pressure. After 12 hours, the reaction system was cooled to room temperature and all volatiles were removed under vacuum to obtain a colorless solid. Analytically pure product (94 mg, 0.24 mmol, 73%) was isolated as colorless block crystals by slowly evaporating a saturated pentane solution of **4** at -35 °C in the refrigerator of glovebox for 48 hours.

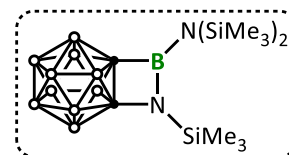

**<sup>1</sup>H NMR** (C<sub>6</sub>D<sub>6</sub>): δ = 3.74 to 2.15 (m, 10H, BH), 0.13 (s, 18H, SiMe<sub>3</sub>), 0.01 (s, 9H, SiMe<sub>3</sub>); **<sup>1</sup>H{<sup>11</sup>B} NMR** (C<sub>6</sub>D<sub>6</sub>): δ = 3.27 (s, 2H, BH), 3.16 (s, 1H, BH), 2.85 (s, 2H, BH), 2.73 (m, 3H, BH), 2.61 (s, 2H, BH), 0.13 (s, 18H, SiMe<sub>3</sub>), 0.02 (s, 9H, SiMe<sub>3</sub>); **<sup>11</sup>B NMR** (C<sub>6</sub>D<sub>6</sub>): δ = 35.0 (s, CbBN), 1.94 (d, J = 154.5 Hz, B<sub>Cb</sub>), 0.0 (d, J = 175.5 Hz, B<sub>Cb</sub>), -8.3 (m, B<sub>Cb</sub>), -11.2 (d, J = 160.7 Hz, B<sub>Cb</sub>), -13.9 (d, J = 162.4 Hz, B<sub>Cb</sub>); **<sup>11</sup>B{<sup>1</sup>H} NMR** (C<sub>6</sub>D<sub>6</sub>): δ = 34.9 (s, CbBN), 2.0 (s, B<sub>Cb</sub>), 0.0 (s, B<sub>Cb</sub>), -8.3 (s, B<sub>Cb</sub>), -11.2 (s, B<sub>Cb</sub>), -13.8 (s, B<sub>Cb</sub>); **<sup>13</sup>C{<sup>1</sup>H} NMR** (C<sub>6</sub>D<sub>6</sub>): δ = 89.0 (C<sub>Cb</sub>N), 3.4 (SiMe<sub>3</sub>), 0.01 (SiMe<sub>3</sub>); **HRMS (m/z)**: [M+H]<sup>+</sup> calcd. for C<sub>11</sub>H<sub>38</sub>B<sub>11</sub>N<sub>2</sub>Si<sub>3</sub>, 403.33664; found 403.33646; **Elemental analysis**: calcd. for C<sub>11</sub>H<sub>37</sub>B<sub>11</sub>N<sub>2</sub>Si<sub>3</sub>, C, 32.98; H, 9.31; N, 6.99; found C, 32.74; H, 9.22; N, 7.08.

## NMR and IR spectra

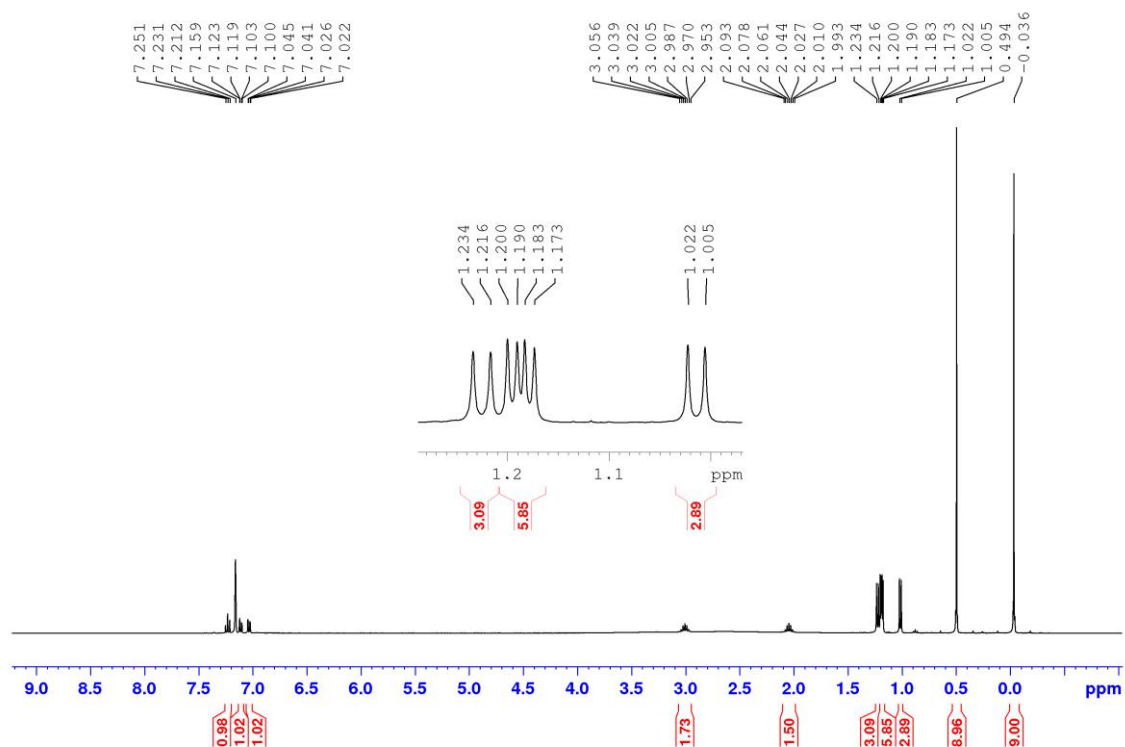

Figure S1.  $^1\text{H}$  NMR spectrum of 2a in  $\text{C}_6\text{D}_6$ .

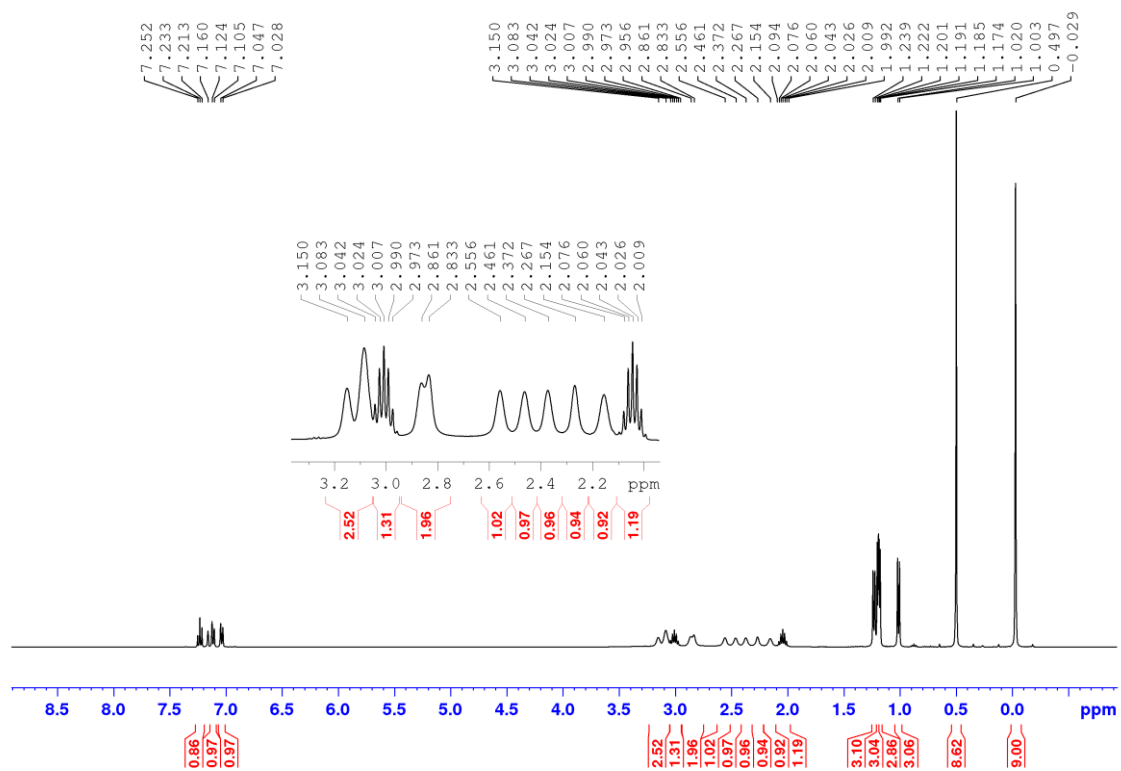

Figure S2.  $^1\text{H}\{^{11}\text{B}\}$  NMR spectrum of 2a in  $\text{C}_6\text{D}_6$ .

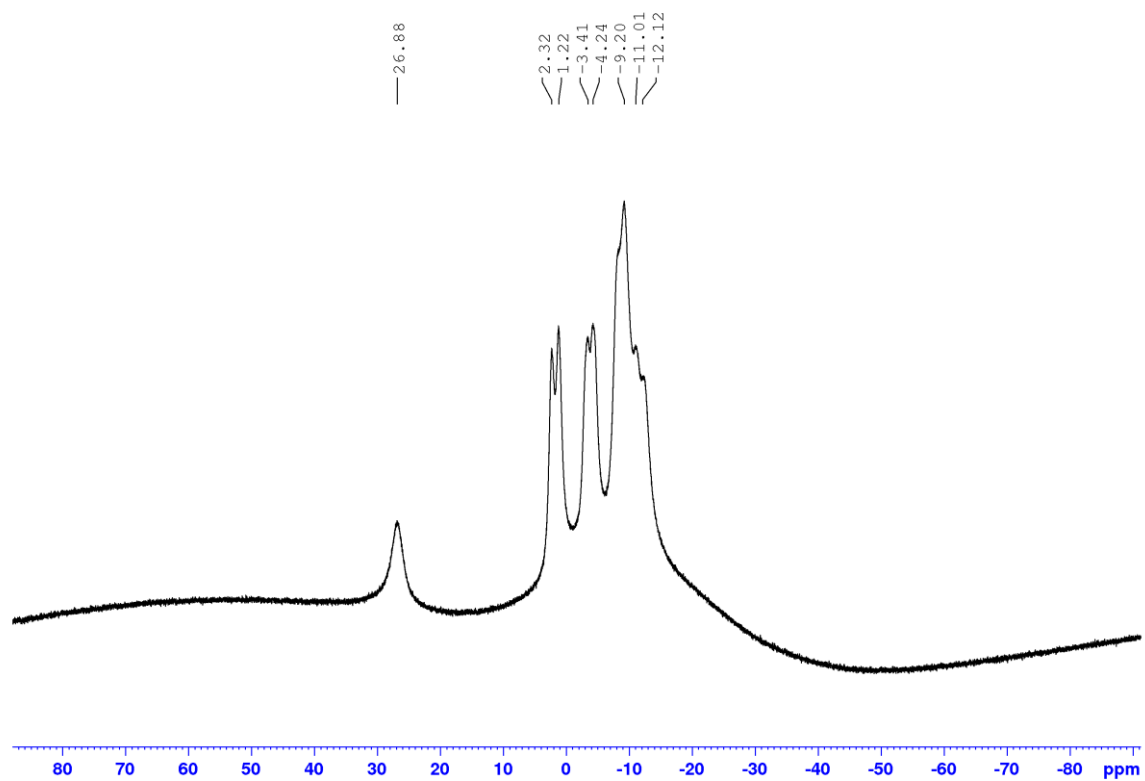

Figure S3.  $^{11}\text{B}$  NMR spectrum of **2a** in  $\text{C}_6\text{D}_6$ .

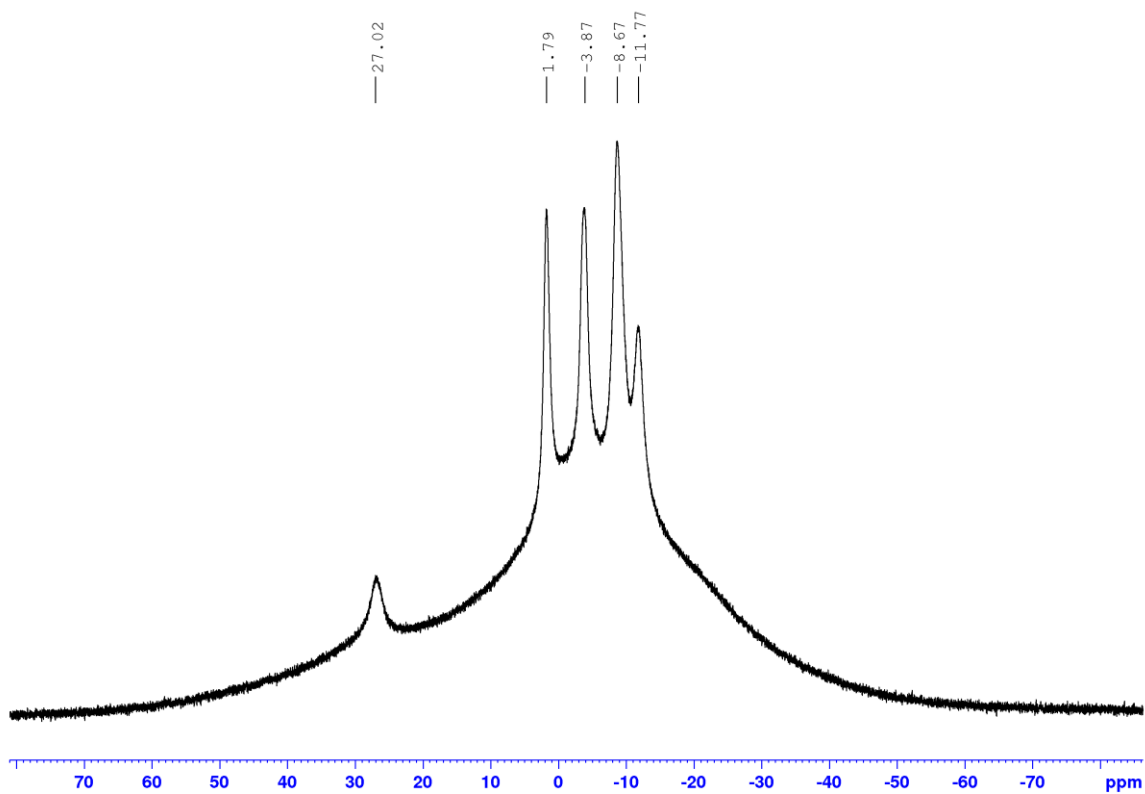

Figure S4.  $^{11}\text{B}\{^1\text{H}\}$  NMR spectrum of **2a** in  $\text{C}_6\text{D}_6$ .

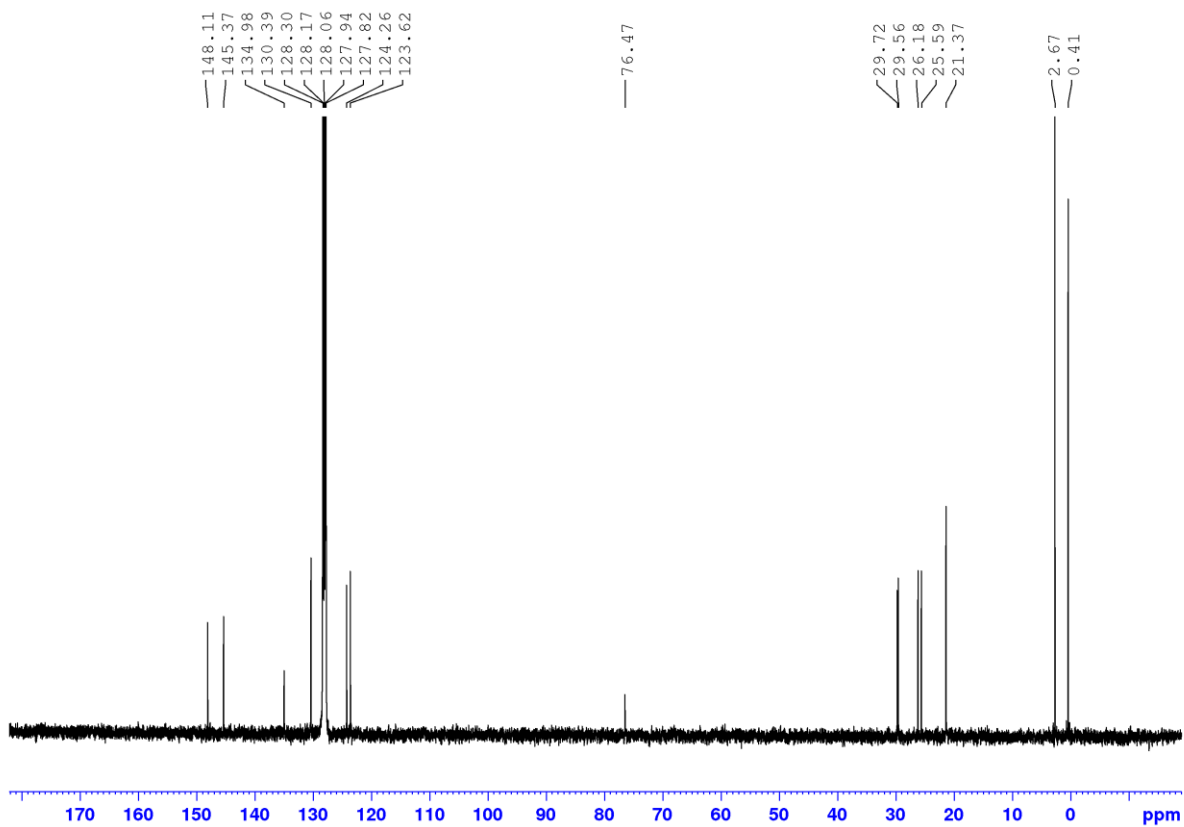

Figure S5.  $^{13}\text{C}\{^1\text{H}\}$  NMR spectrum of **2a** in  $\text{C}_6\text{D}_6$ .

Nutzer Libo Xiang  
%Proton\_32ns C6D6 (D:\NMR-Daten\_AV\_III\_Nanobay) Xiang 2

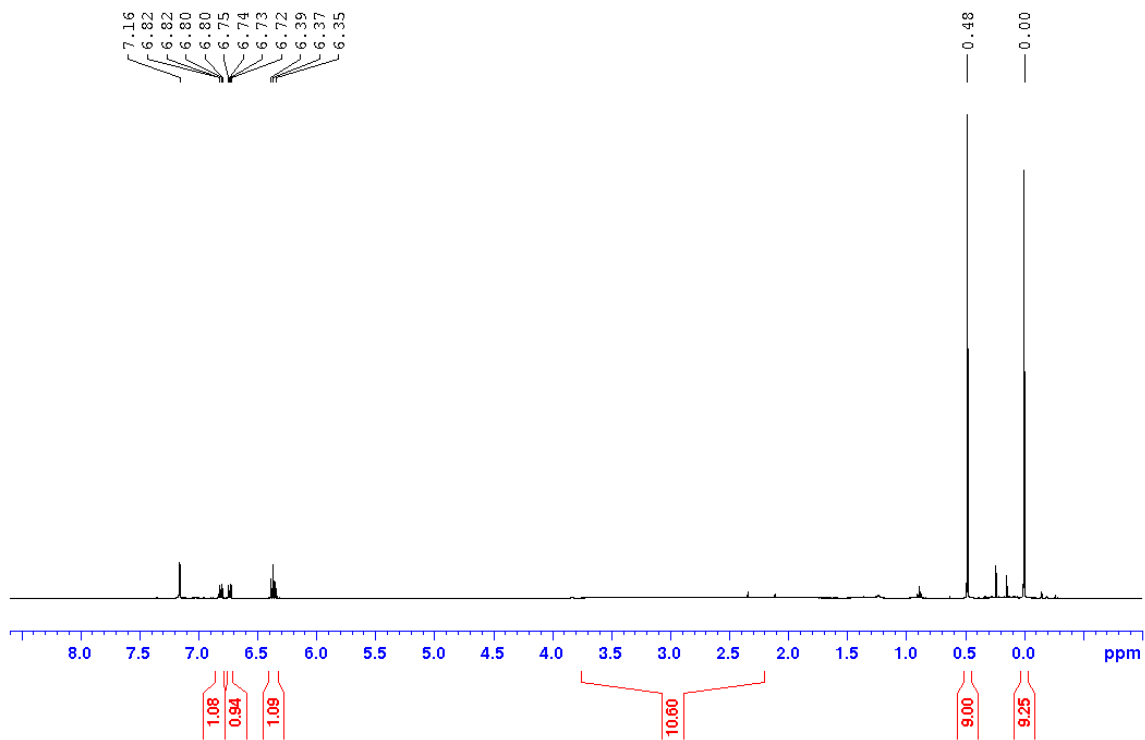

Figure S6.  $^1\text{H}$  NMR spectrum of **2b** in  $\text{C}_6\text{D}_6$ .

Nutzer Libo Xiang  
%ProB11dec\_32ns C6D6 (D:\NMR-Daten\_AV\_III\_Nanobay) Xiang 2

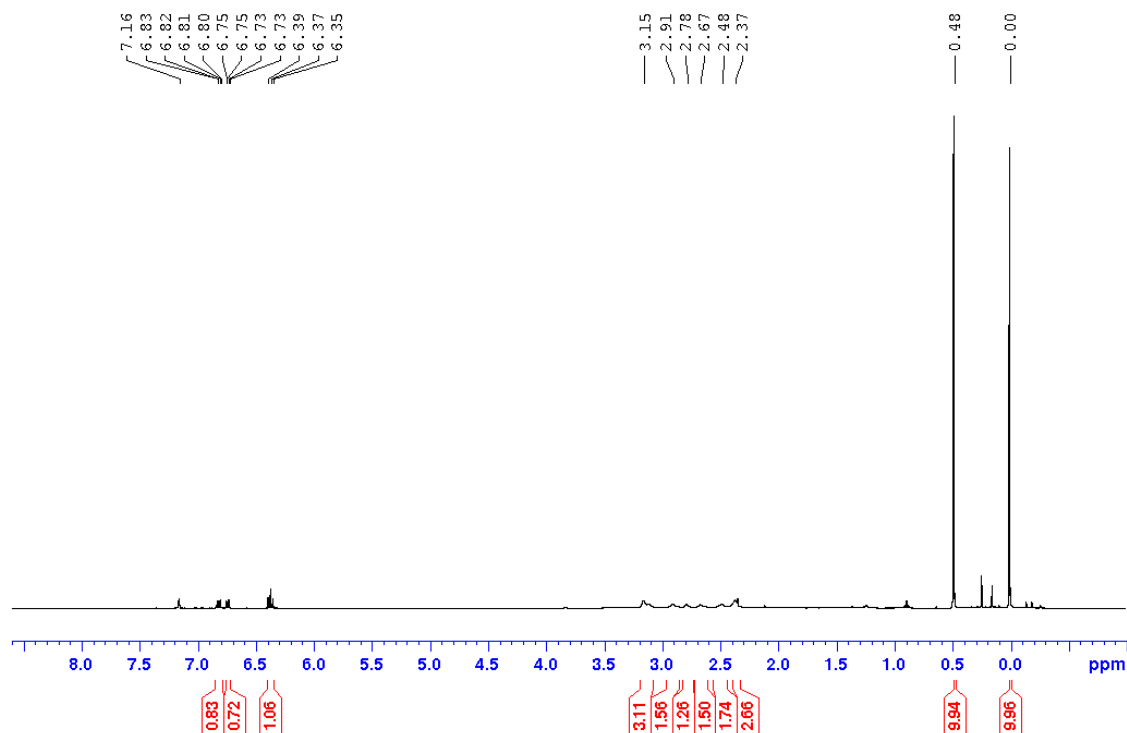

Figure S7.  $^1\text{H}\{^{11}\text{B}\}$  NMR spectrum of **2b** in  $\text{C}_6\text{D}_6$ .

Nutzer Libo Xiang  
%B11\_ZG\_256ns C6D6 (D:\NMR-Daten\_AV\_III\_Nanobay) Xiang 2

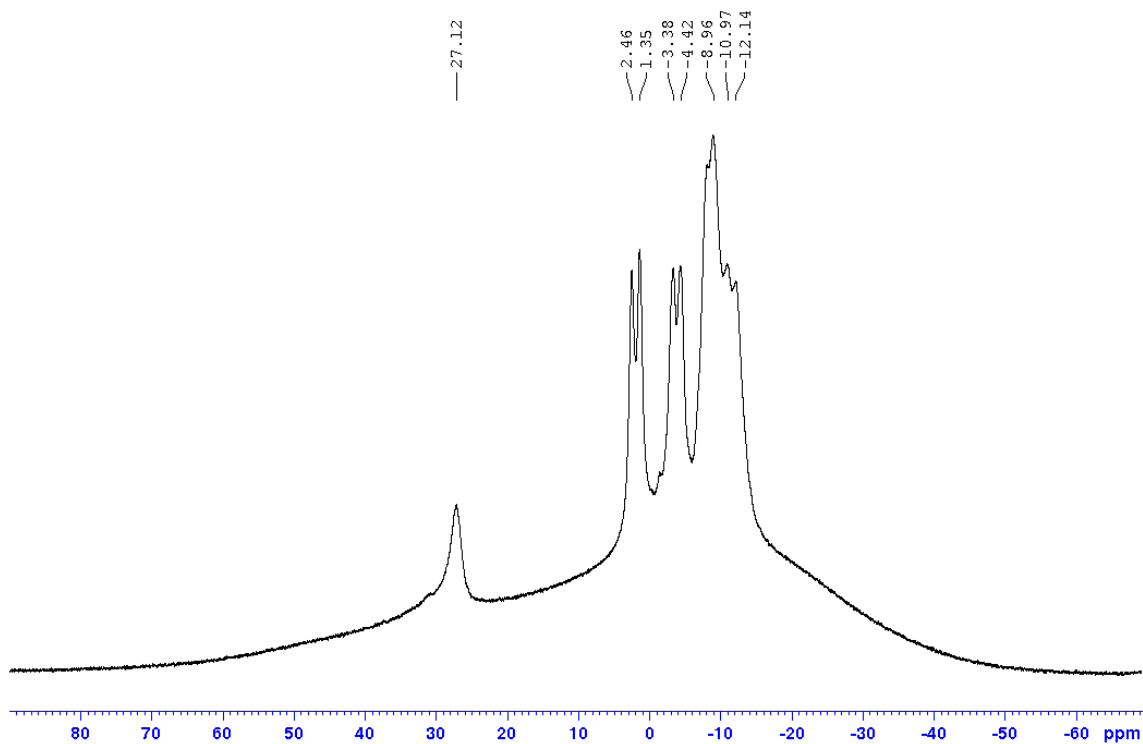

Figure S8.  $^{11}\text{B}$  NMR spectrum of **2b** in  $\text{C}_6\text{D}_6$ .



Nutzer Libo Xiang  
%B11\_CPD\_128ns C6D6 (D:\NMR-Daten\_AV\_III\_Nanobay) Xiang 2

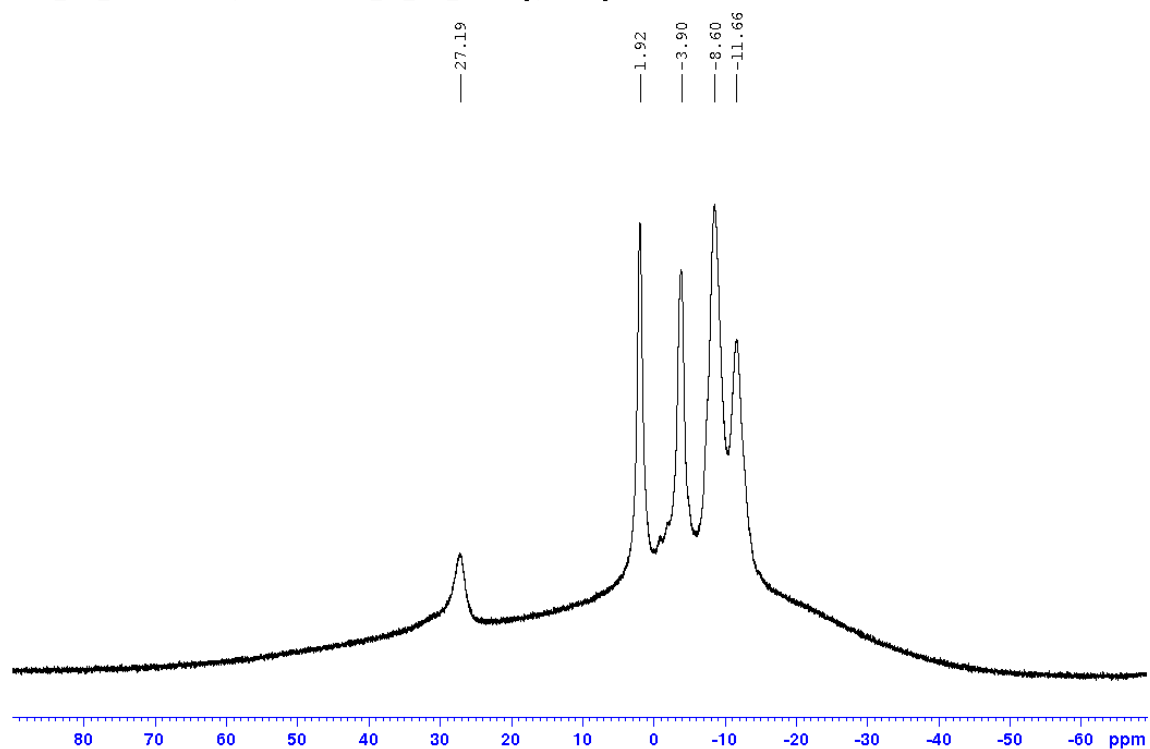

Figure S9.  $^{11}\text{B}\{^1\text{H}\}$  NMR spectrum of **2b** in  $\text{C}_6\text{D}_6$ .

Nutzer Libo Xiang  
%C13\_CPD C6D6 (D:\NMR-Daten\_AV\_III\_Nanobay) Xiang 2

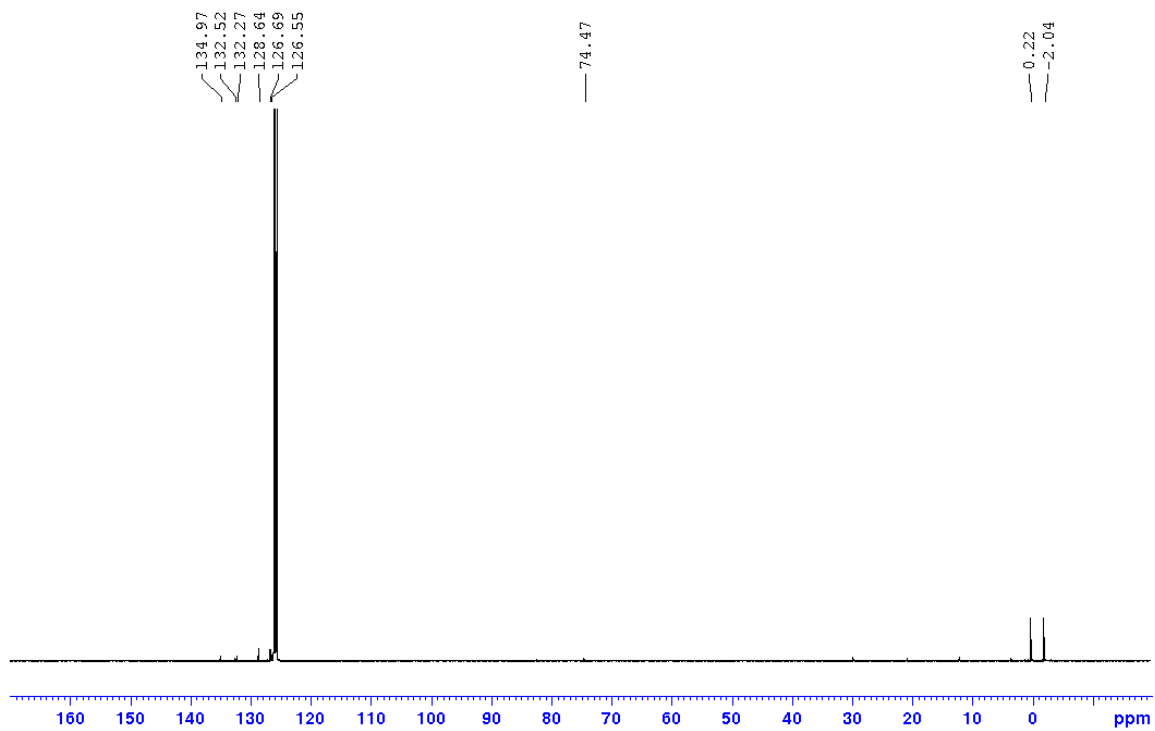

Figure S10.  $^{13}\text{C}\{^1\text{H}\}$  NMR spectrum of **2b** in  $\text{C}_6\text{D}_6$ .

Nutzer Libo Xiang  
&Proton\_32ns C6D6 (D:\NMR-Daten\_AV\_III\_Nanobay) Xiang 3

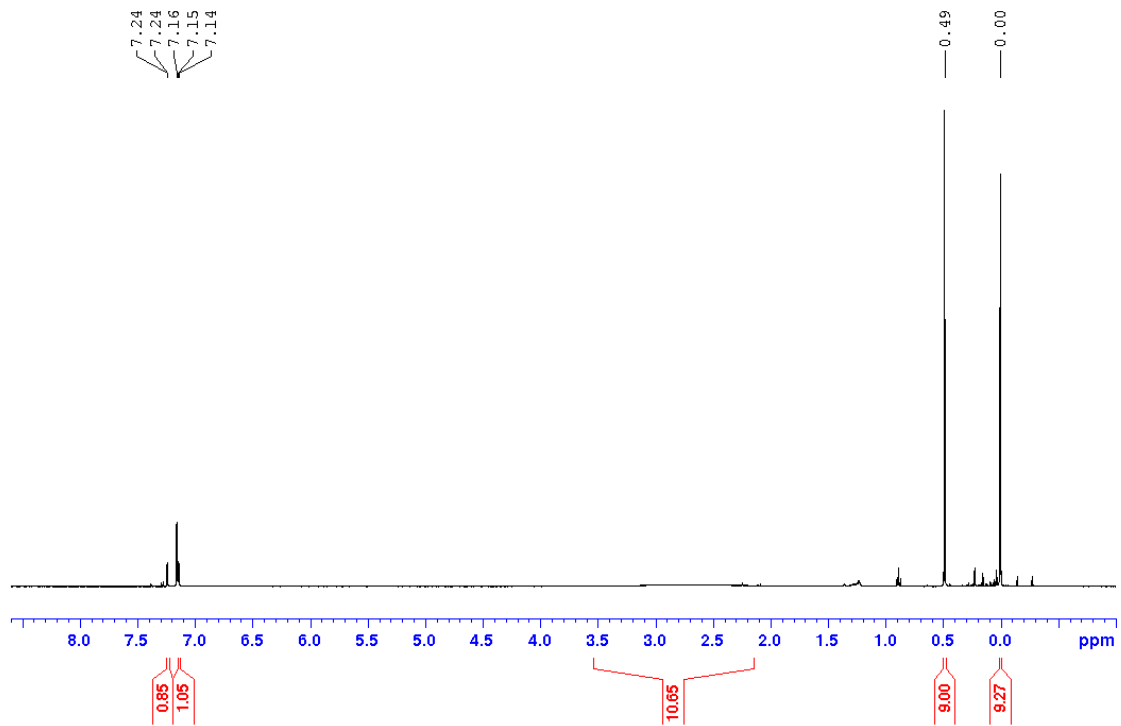

Figure S11.  $^1\text{H}$  NMR spectrum of **2c** in  $\text{C}_6\text{D}_6$ .

Nutzer Libo Xiang  
&ProB11dec\_32ns C6D6 (D:\NMR-Daten\_AV\_III\_Nanobay) Xiang 3

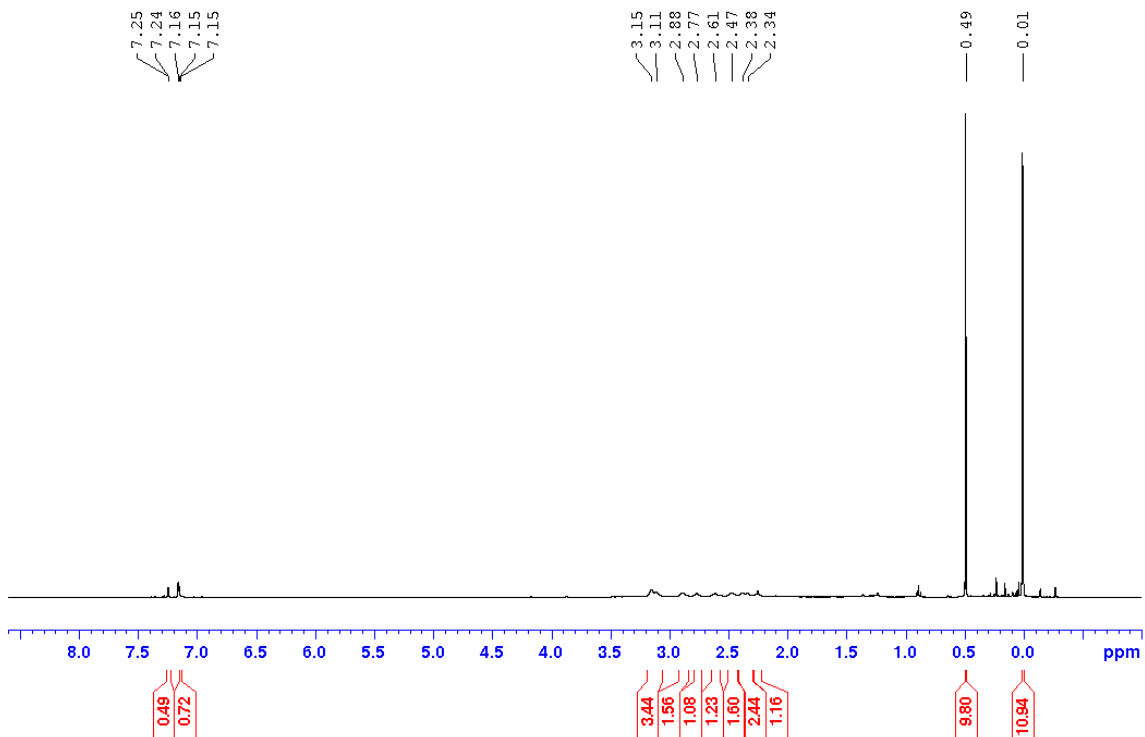

Figure S12.  $^1\text{H}\{^{11}\text{B}\}$  NMR spectrum of **2c** in  $\text{C}_6\text{D}_6$ .

Nutzer Libo Xiang  
%B11\_ZG\_256ns C6D6 (D:\NMR-Daten\_AV\_III\_Nanobay) Xiang 3

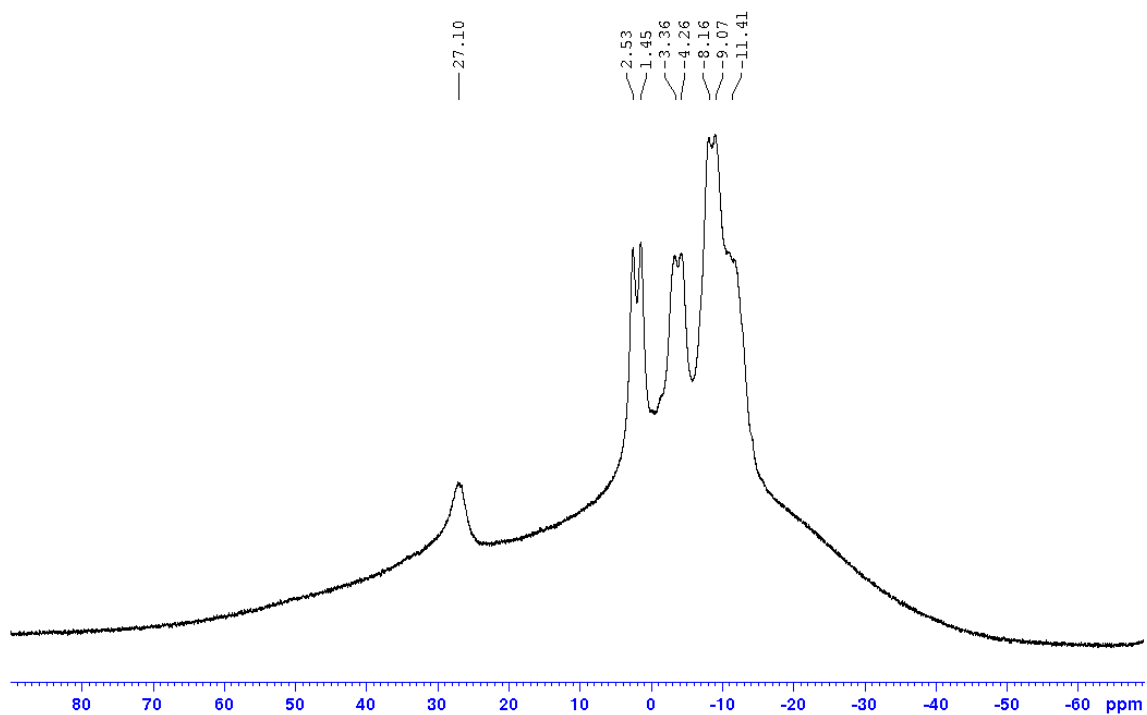

Figure S13.  $^{11}\text{B}$  NMR spectrum of **2c** in  $\text{C}_6\text{D}_6$ .

Nutzer Libo Xiang  
%B11\_CPD\_128ns C6D6 (D:\NMR-Daten\_AV\_III\_Nanobay) Xiang 3

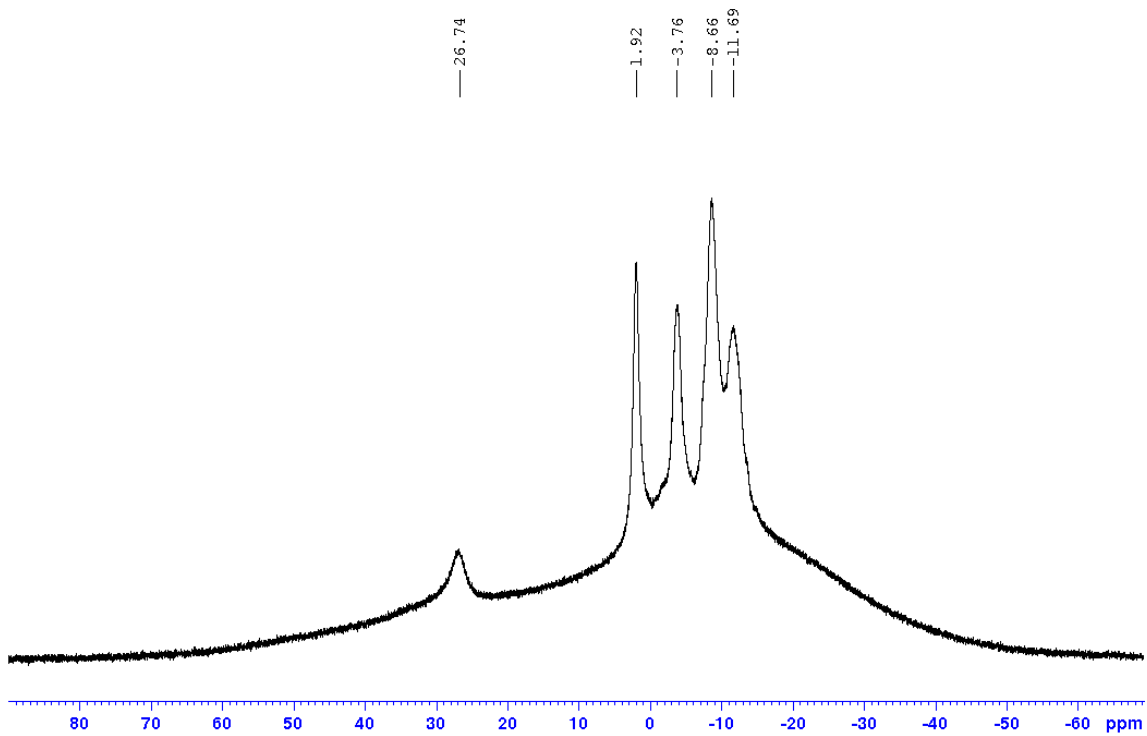

Figure S14.  $^{11}\text{B}\{^1\text{H}\}$  NMR spectrum of **2c** in  $\text{C}_6\text{D}_6$ .

Nutzer Libo Xiang  
%C13\_CPD C6D6 (D:\NMR-Daten\_AV\_III\_Nanobay) Xiang 3

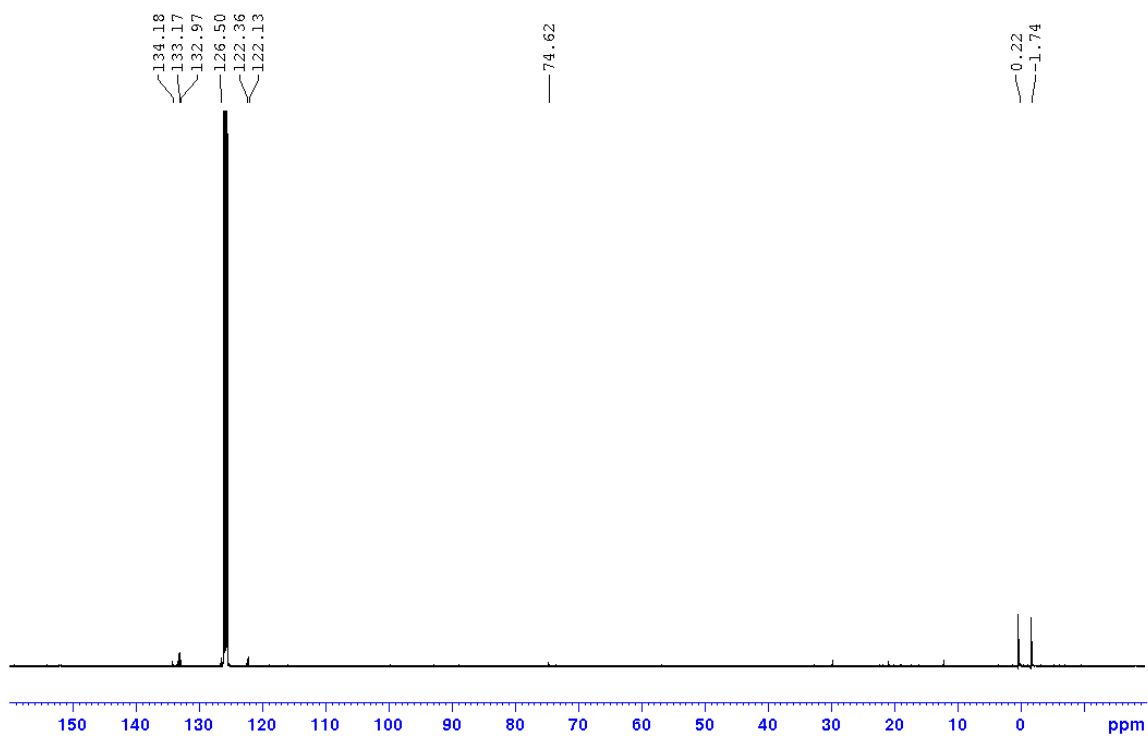

Figure S15.  $^{13}\text{C}\{^1\text{H}\}$  NMR spectrum of **2c** in  $\text{C}_6\text{D}_6$ .

Nutzer Libo Xiang  
%Proton\_32ns C6D6 (D:\NMR-Daten\_AV\_III\_Nanobay) Xiang 1

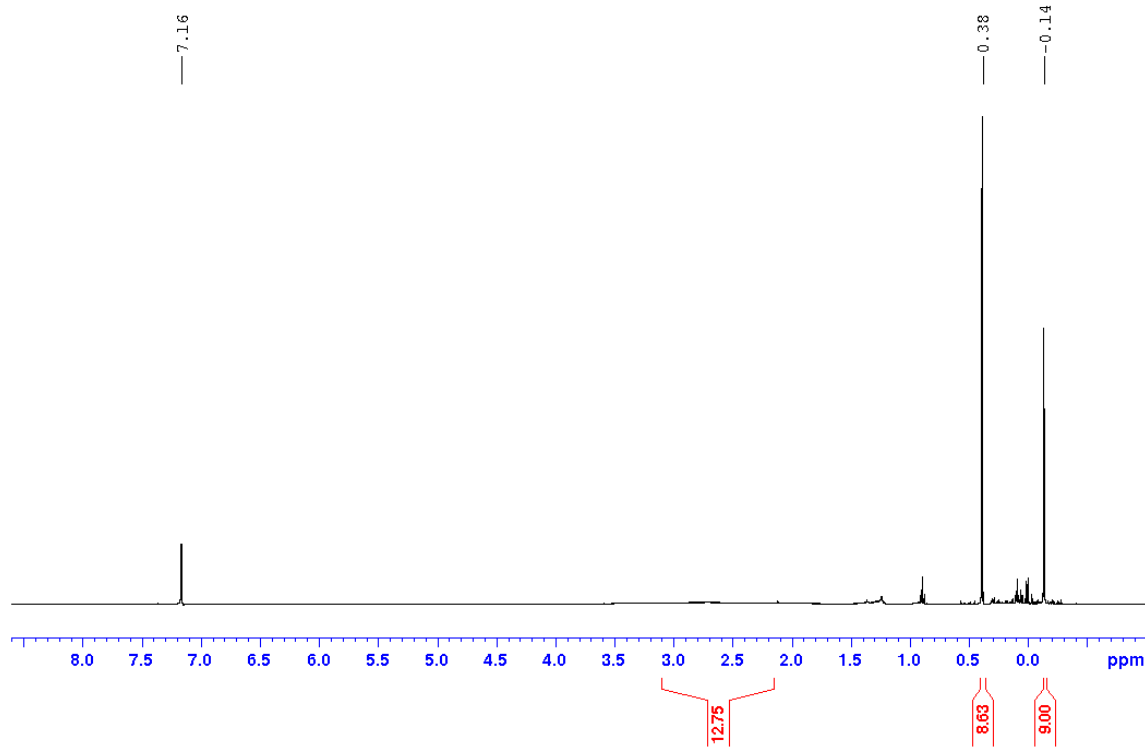

Figure S16.  $^1\text{H}$  NMR spectrum of **2d** in  $\text{C}_6\text{D}_6$ .

Nutzer Libo Xiang  
%ProB11dec\_32ns C6D6 (D:\NMR-Daten\_AV\_III\_Nanobay) Xiang 1

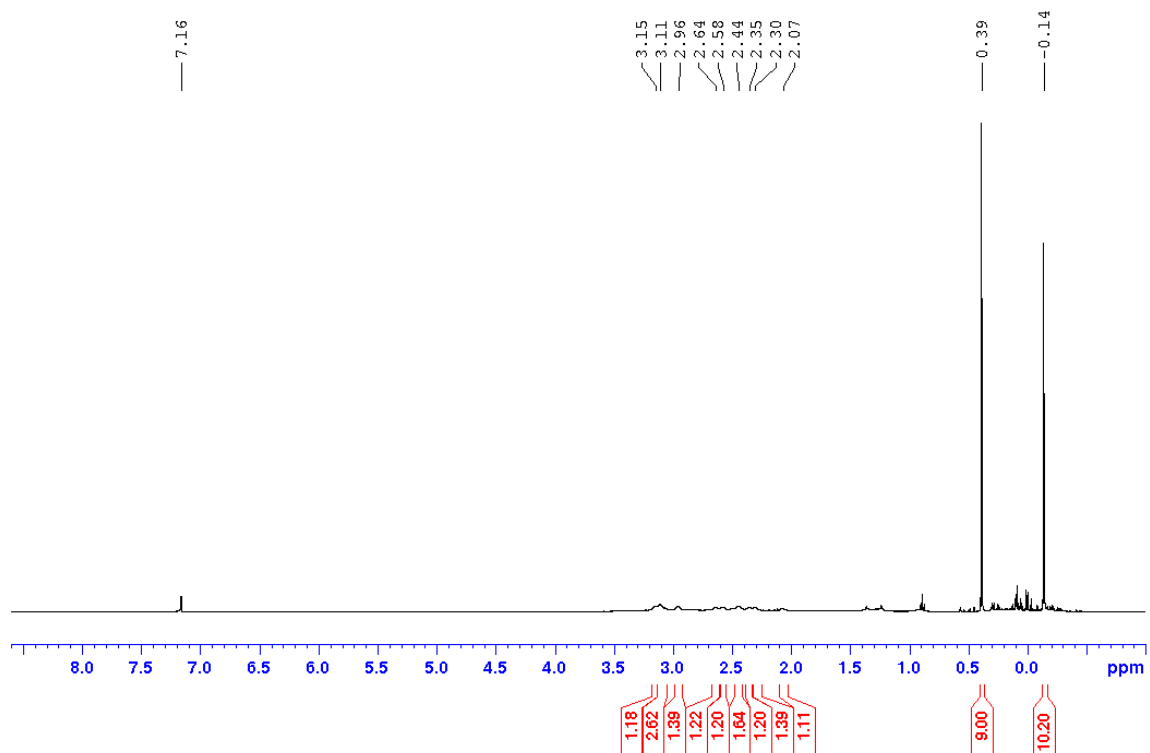

Figure S17.  $^1\text{H}\{^{11}\text{B}\}$  NMR spectrum of **2d** in  $\text{C}_6\text{D}_6$ .

Nutzer Libo Xiang  
%B11\_ZG\_256ns C6D6 (D:\NMR-Daten\_AV\_III\_Nanobay) Xiang 1

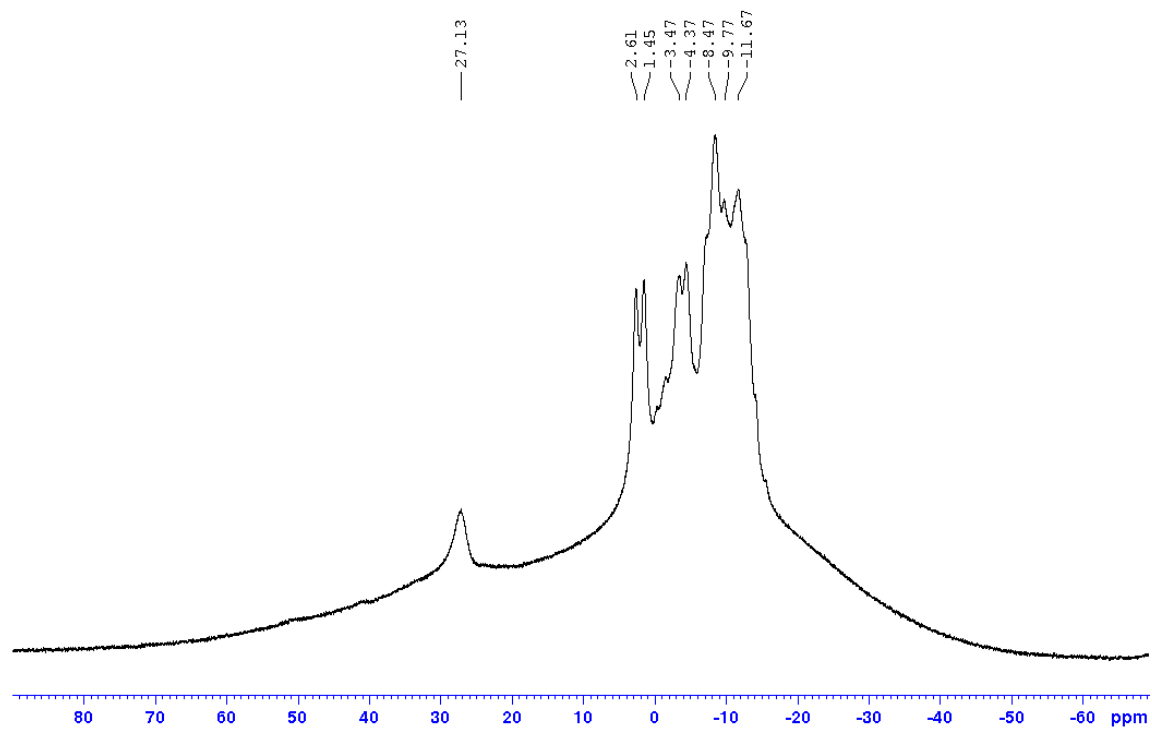

Figure S18.  $^{11}\text{B}$  NMR spectrum of **2d** in  $\text{C}_6\text{D}_6$ .

Nutzer Libo Xiang  
%B11\_CPD\_128ns C6D6 {D:\NMR-Daten\_AV\_III\_Nanobay} Xiang 1

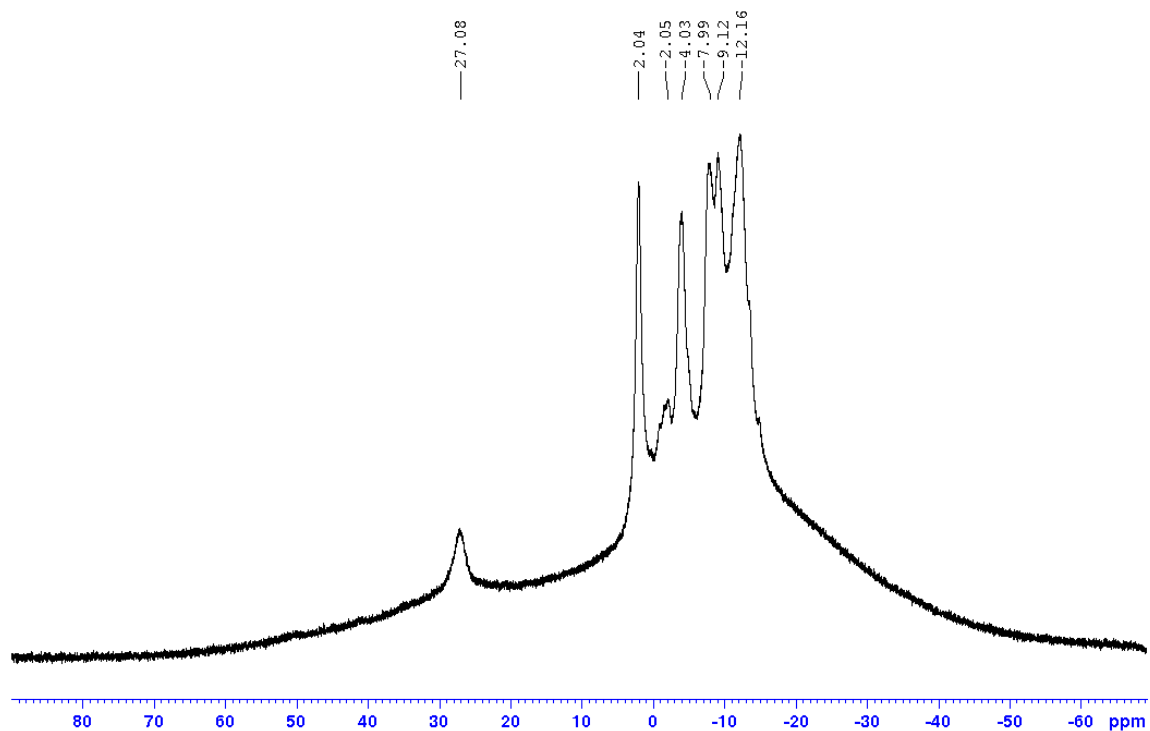

Figure S19.  $^{11}\text{B}\{^1\text{H}\}$  NMR spectrum of **2d** in  $\text{C}_6\text{D}_6$ .

Nutzer Xiang  
XLB23056  
AC13CPD\_PRODI C6D6 {D:\NMR\_Daten\_500MHz\_IAC} nmrsu

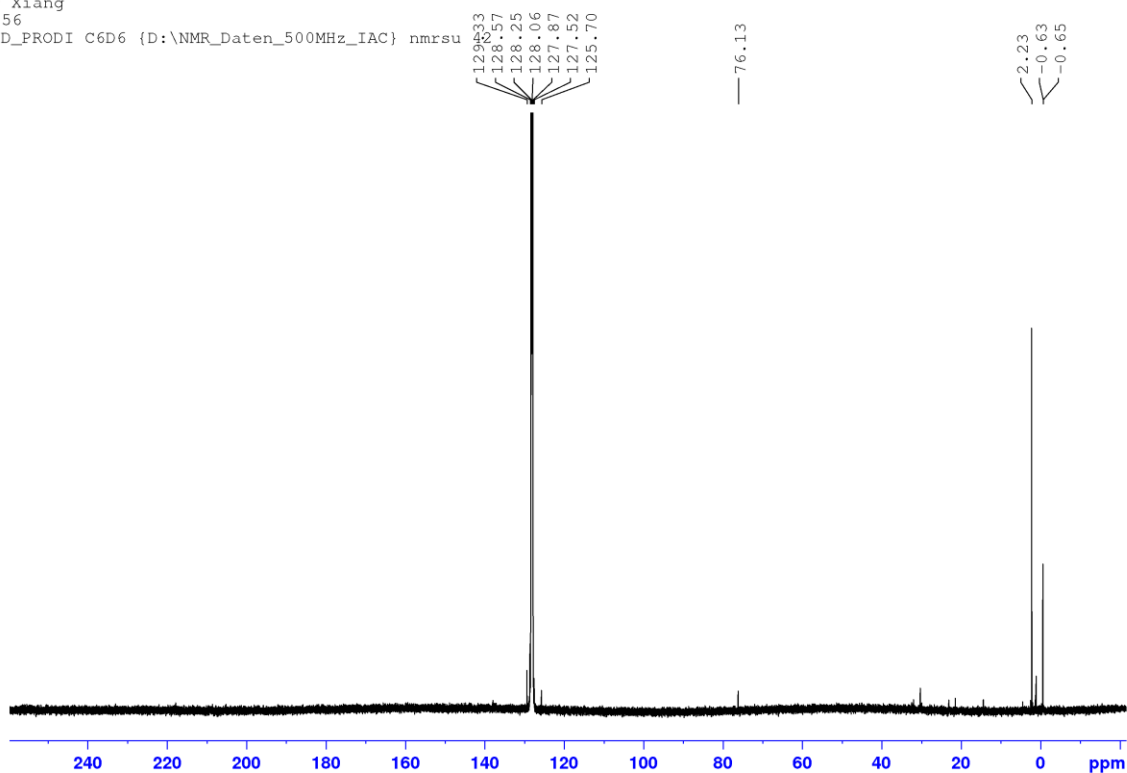

Figure S20.  $^{13}\text{C}\{^1\text{H}\}$  NMR spectrum of **2d** in  $\text{C}_6\text{D}_6$ .

Nutzer Xiang  
XLB23056  
A19FZG\_PRODI C6D6 {D:\NMR\_Daten\_500MHz\_IAC} nmrsu 42

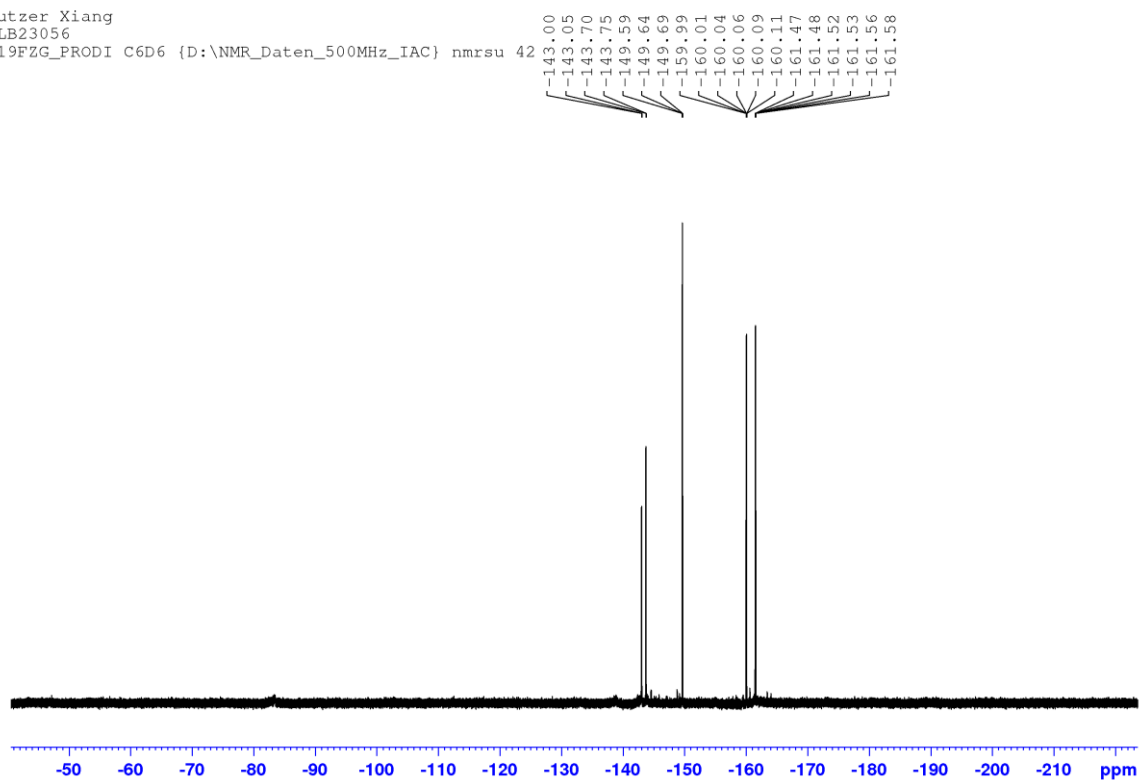

Figure S21.  $^{19}\text{F}$  NMR spectrum of **2d** in  $\text{C}_6\text{D}_6$ .

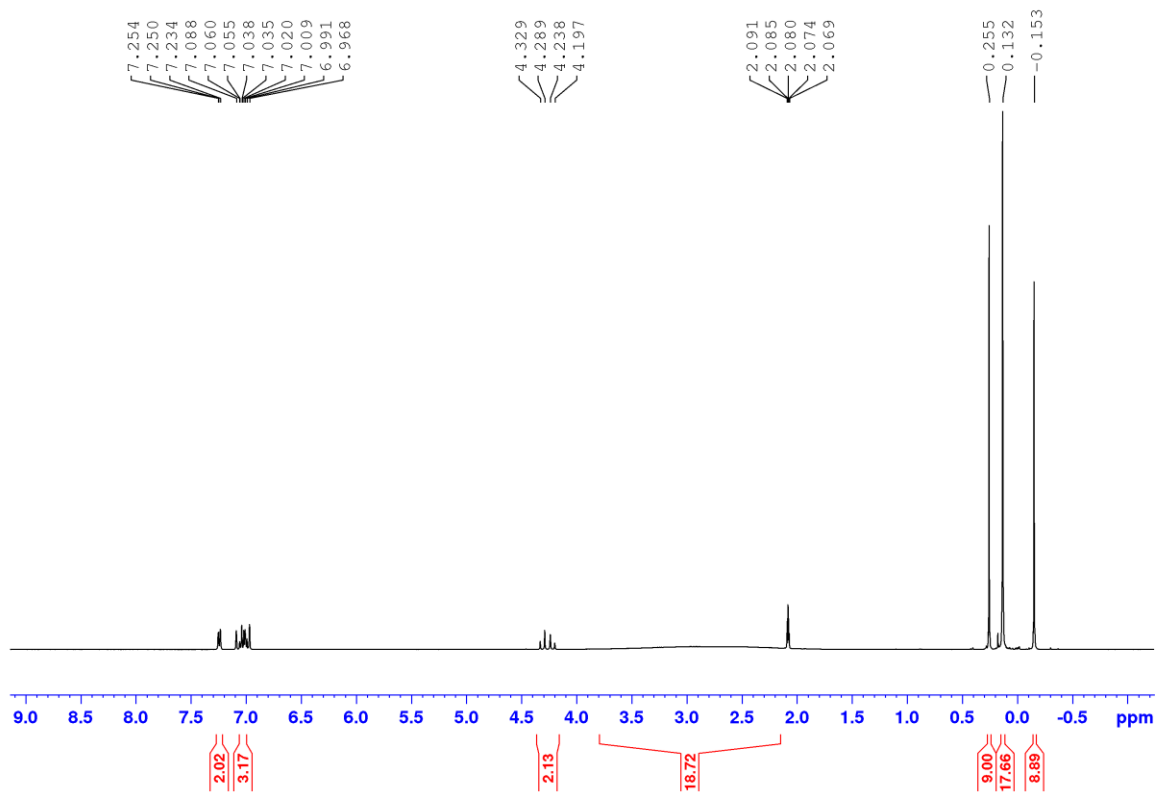

Figure S22.  $^1\text{H}$  NMR spectrum of **3** in  $\text{C}_6\text{D}_6$ .

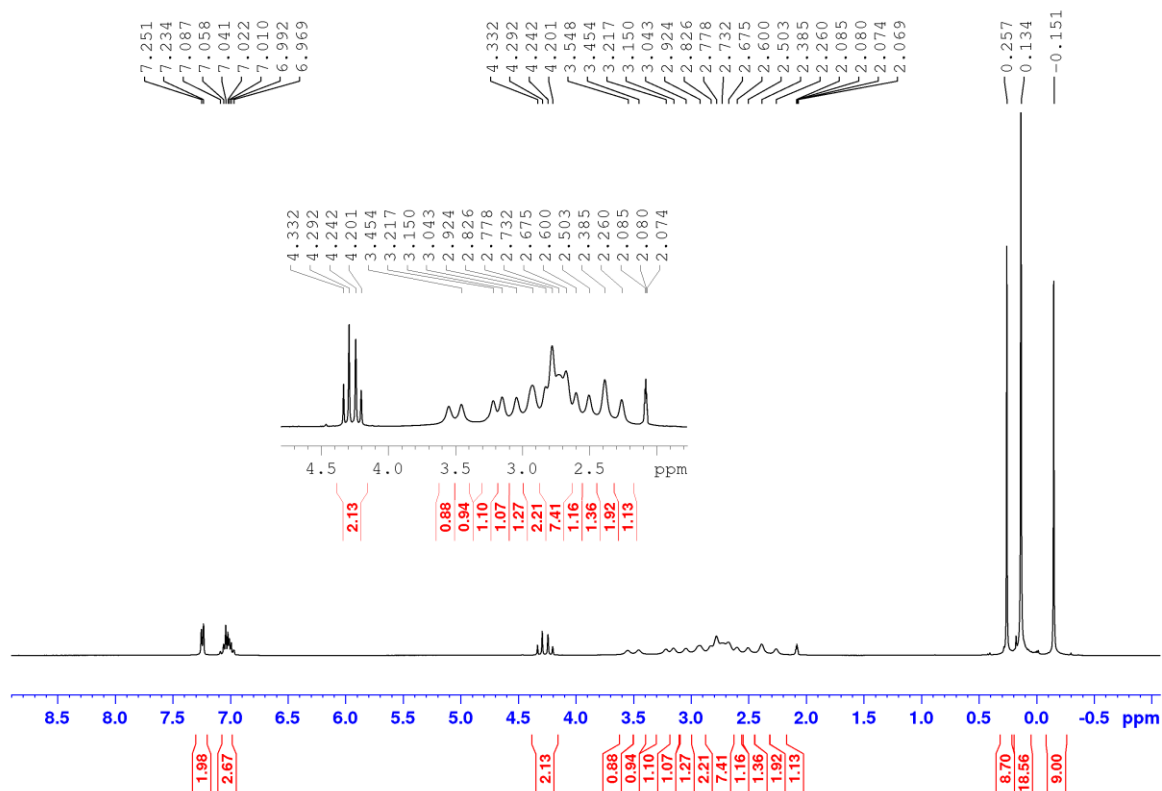

Figure S23.  $^1\text{H}\{^{11}\text{B}\}$  NMR spectrum of **3** in  $\text{C}_6\text{D}_6$ .

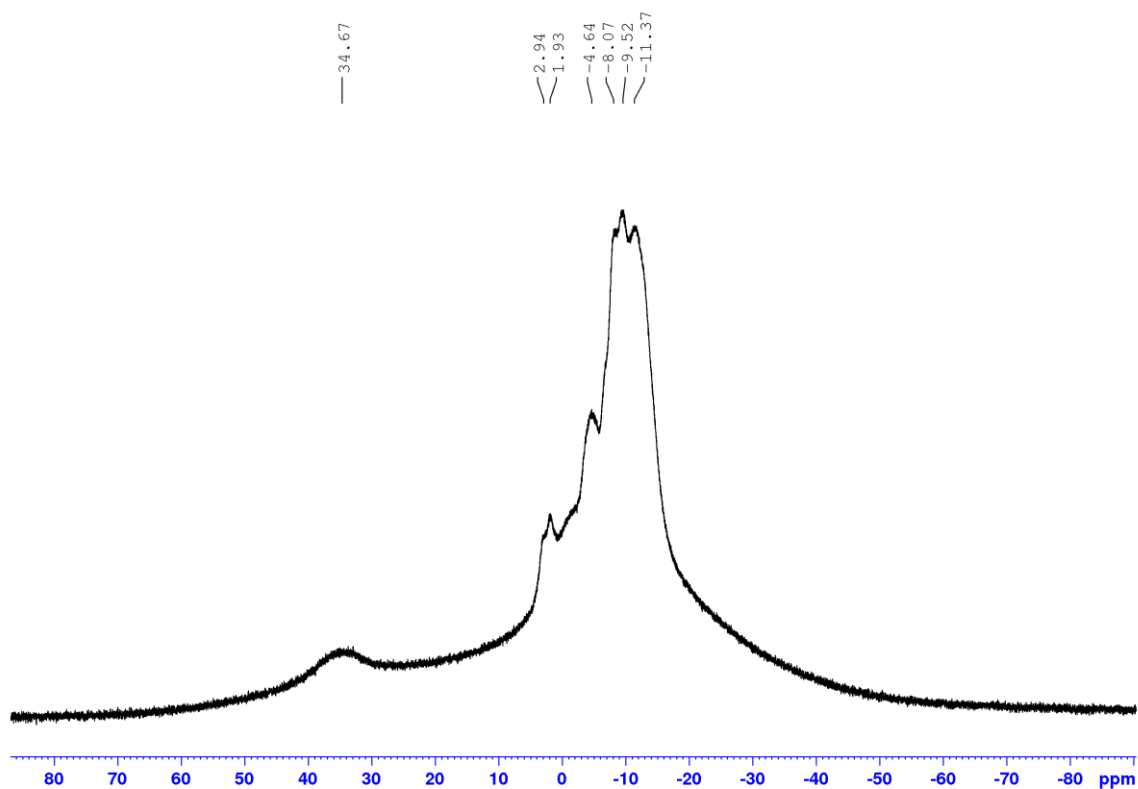

Figure S24.  $^{11}\text{B}$  NMR spectrum of **3** in  $\text{C}_6\text{D}_6$ .



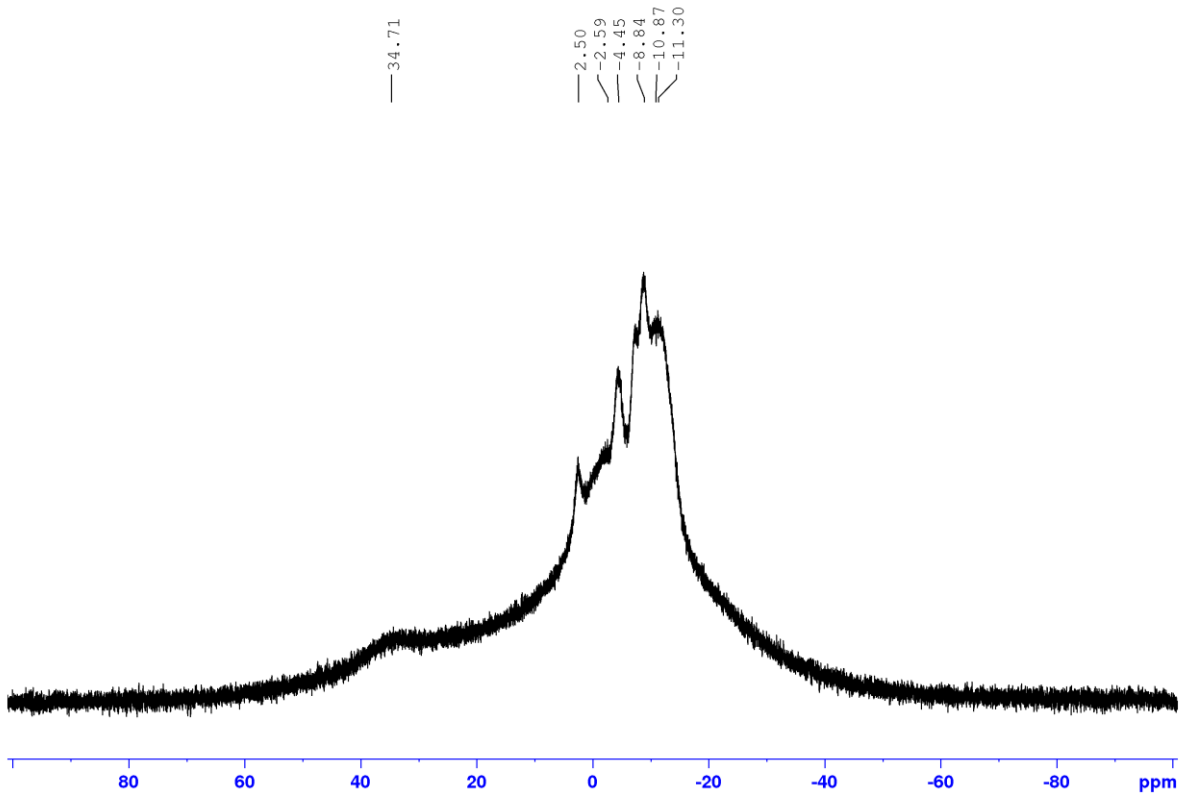

Figure S25.  $^{11}\text{B}\{^1\text{H}\}$  NMR spectrum of **3** in  $\text{C}_6\text{D}_6$ .

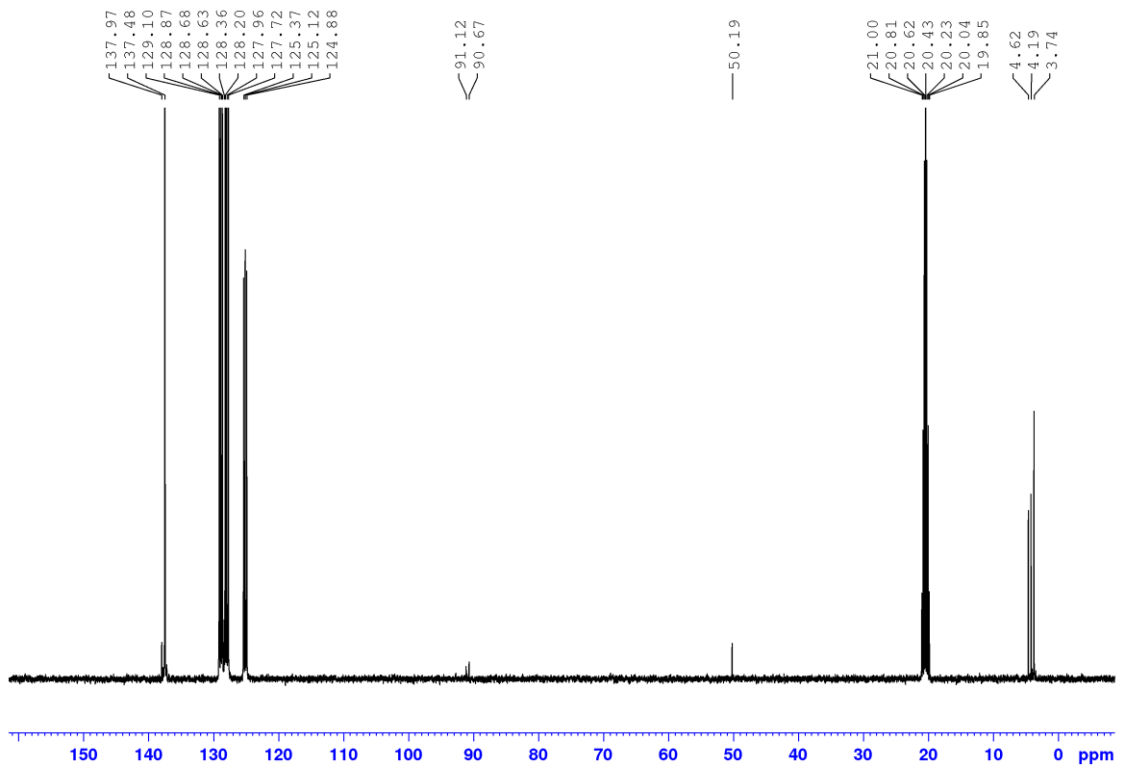

Figure S26.  $^{13}\text{C}\{^1\text{H}\}$  NMR spectrum of **3** in  $\text{C}_6\text{D}_6$ .

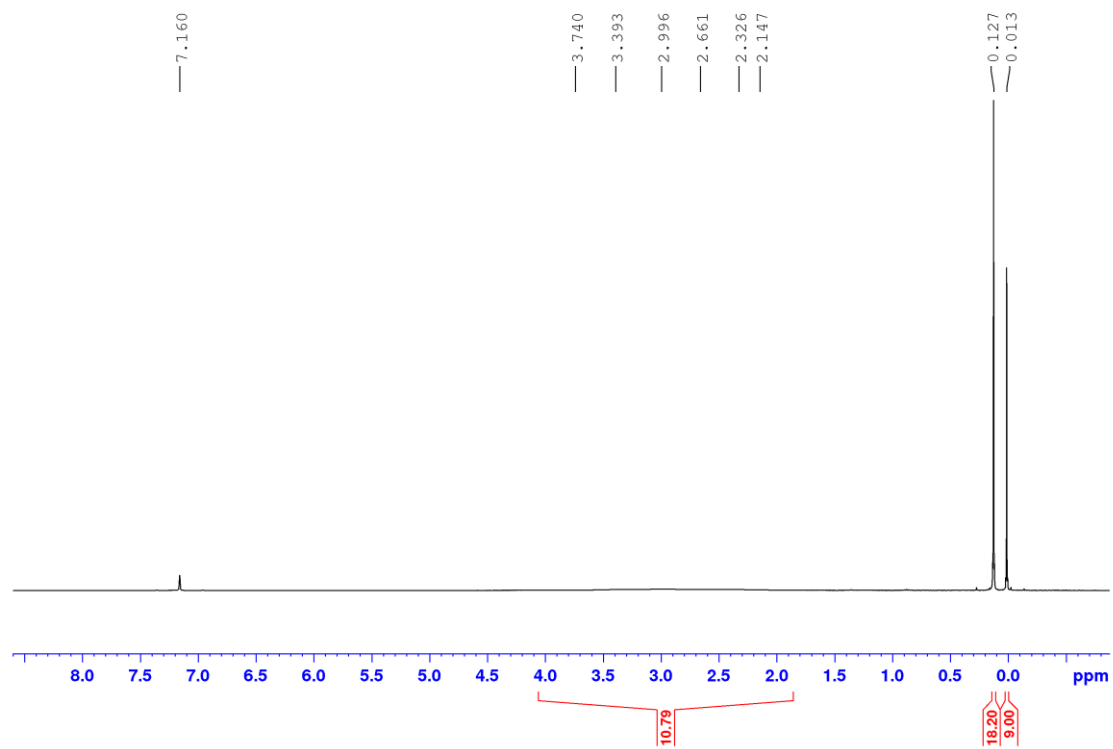

Figure S27.  $^1\text{H}$  NMR spectrum of **4** in  $\text{C}_6\text{D}_6$ .

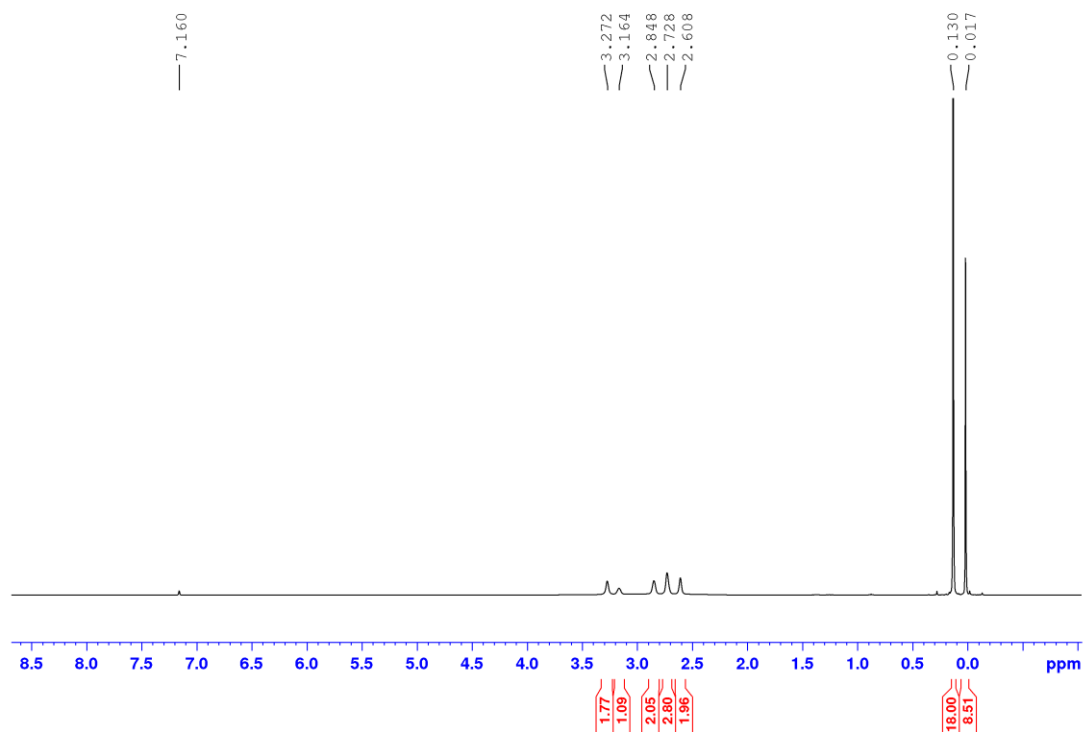

Figure S28.  $^1\text{H}\{^{11}\text{B}\}$  NMR spectrum of **4** in  $\text{C}_6\text{D}_6$ .

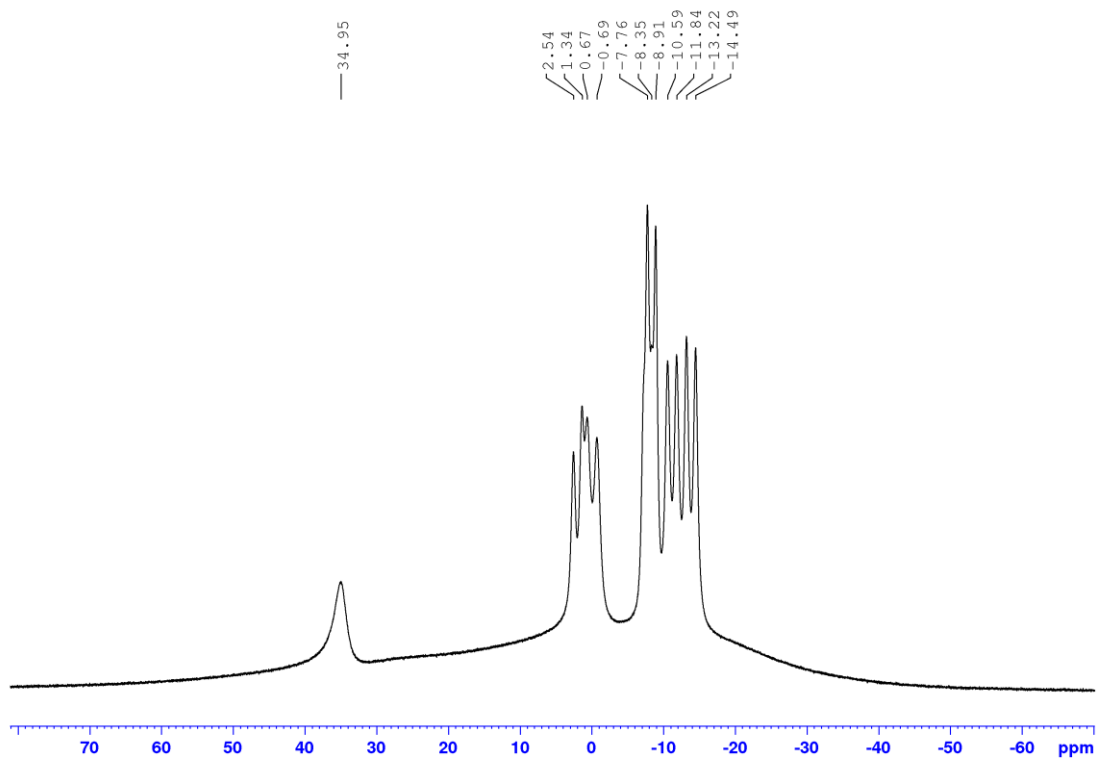

Figure S29.  $^{11}\text{B}$  NMR spectrum of **4** in  $\text{C}_6\text{D}_6$ .

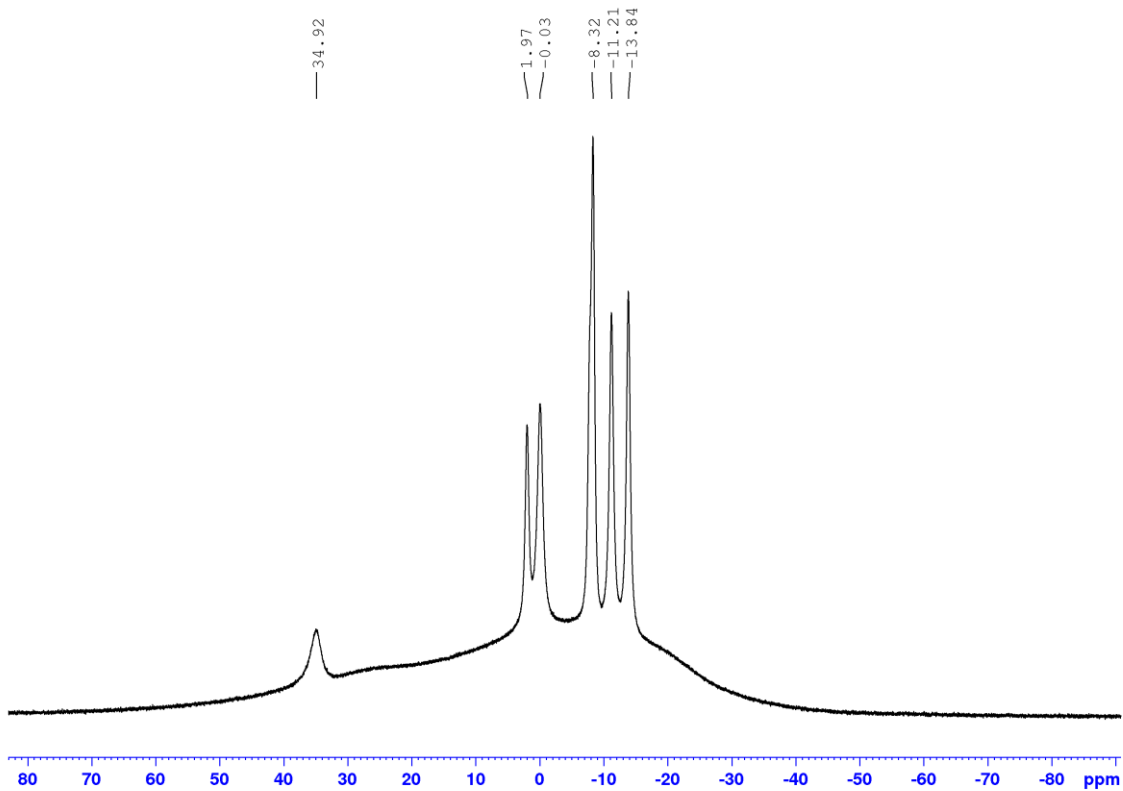

Figure S30.  $^{11}\text{B}\{^1\text{H}\}$  NMR spectrum of **4** in  $\text{C}_6\text{D}_6$ .

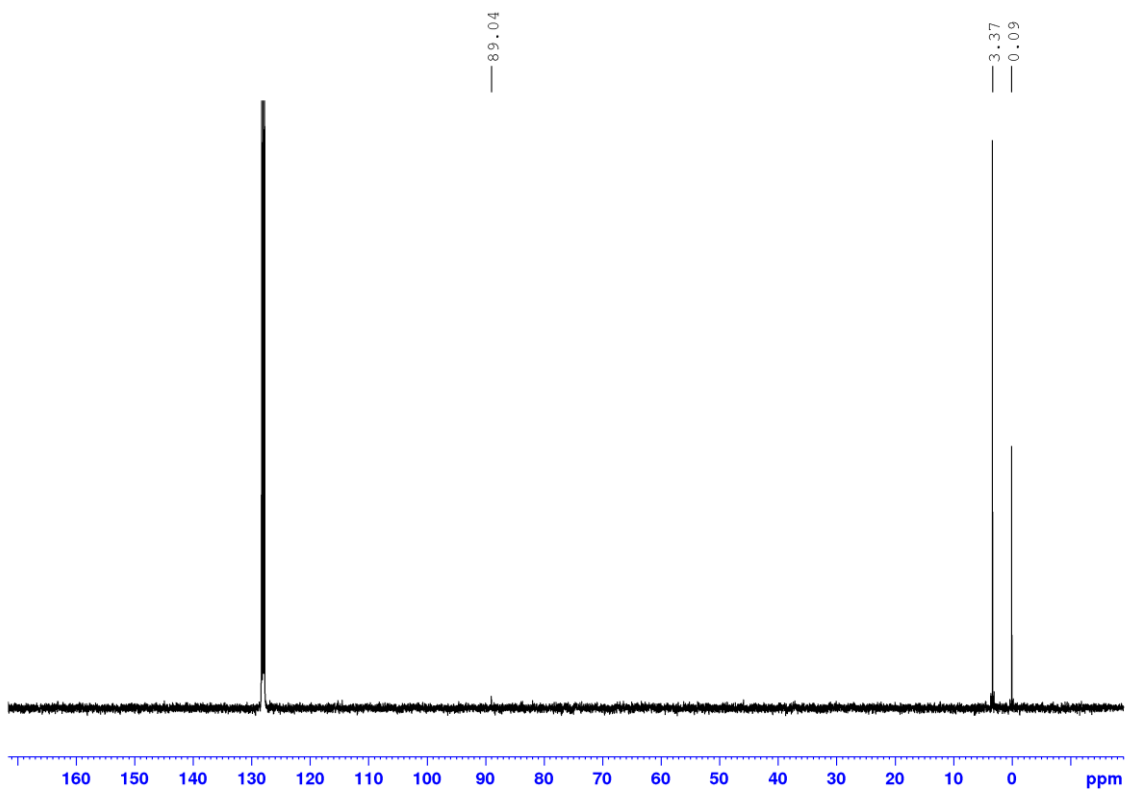

Figure S31  $^{13}\text{C}\{^1\text{H}\}$  NMR spectrum of **4** in  $\text{C}_6\text{D}_6$ .

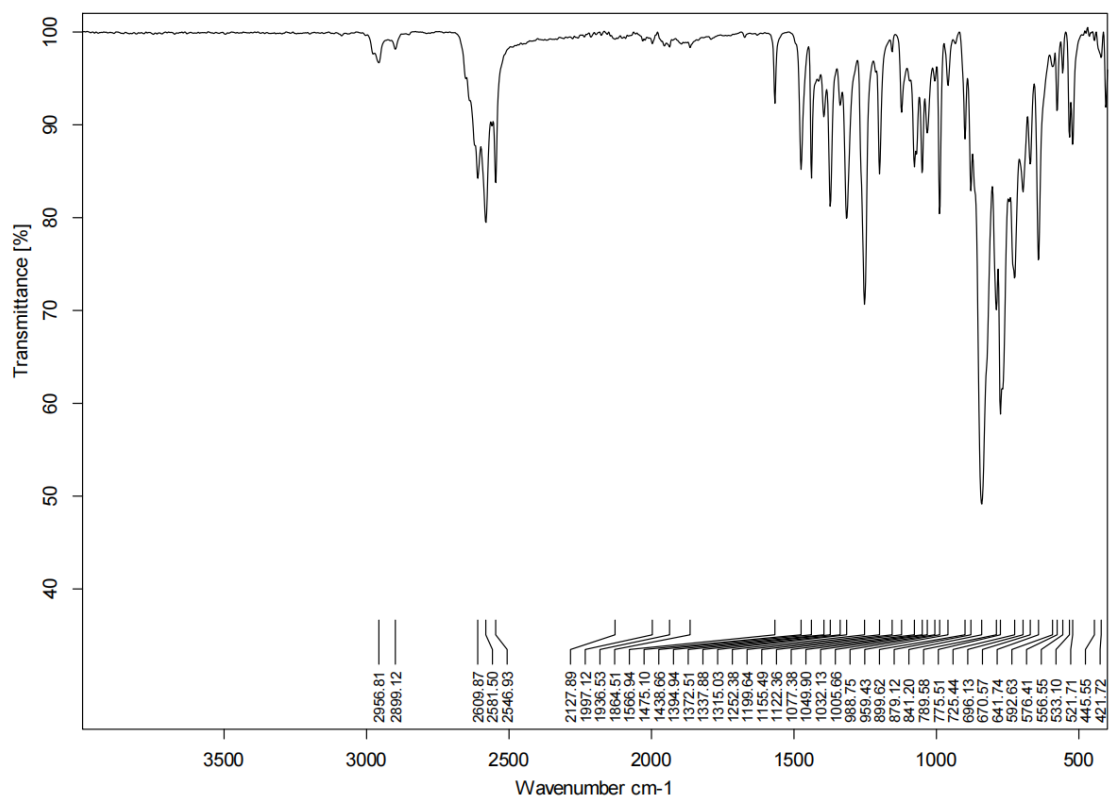

Figure S32. IR spectrum of **2b**.

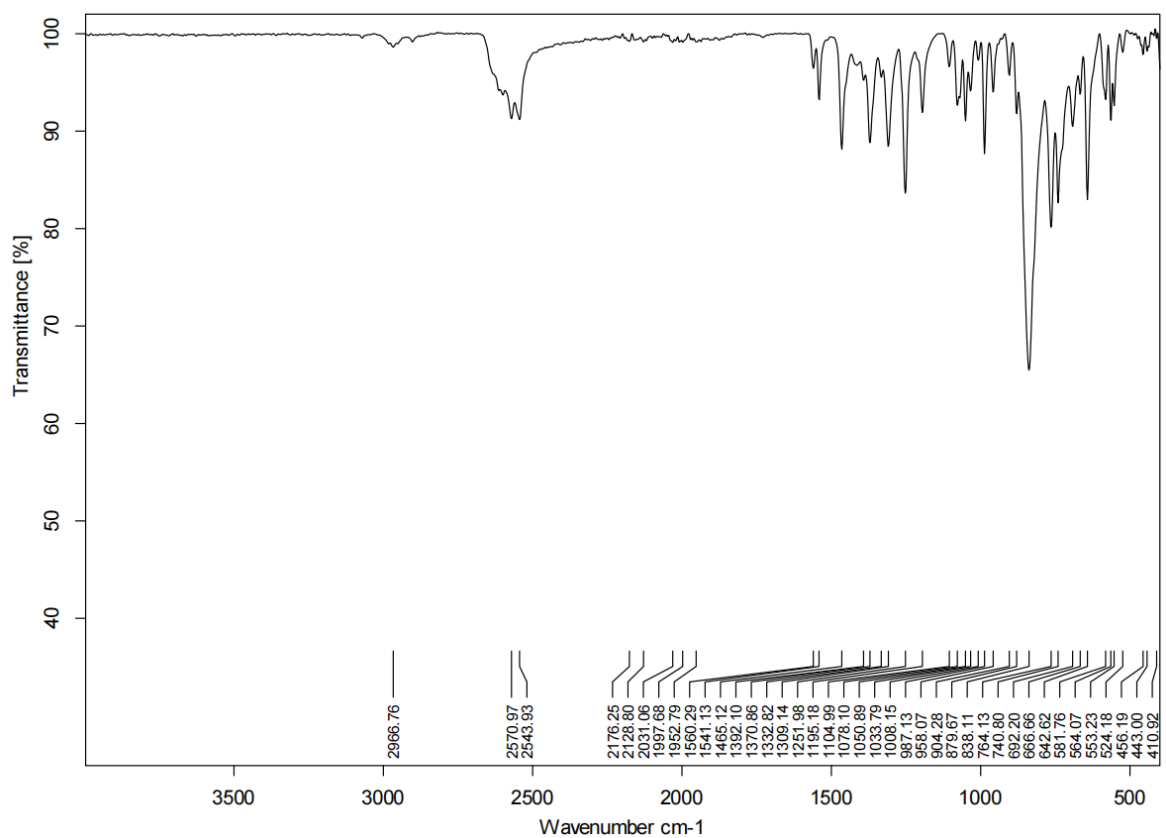

Figure S33. IR spectrum of 2c.

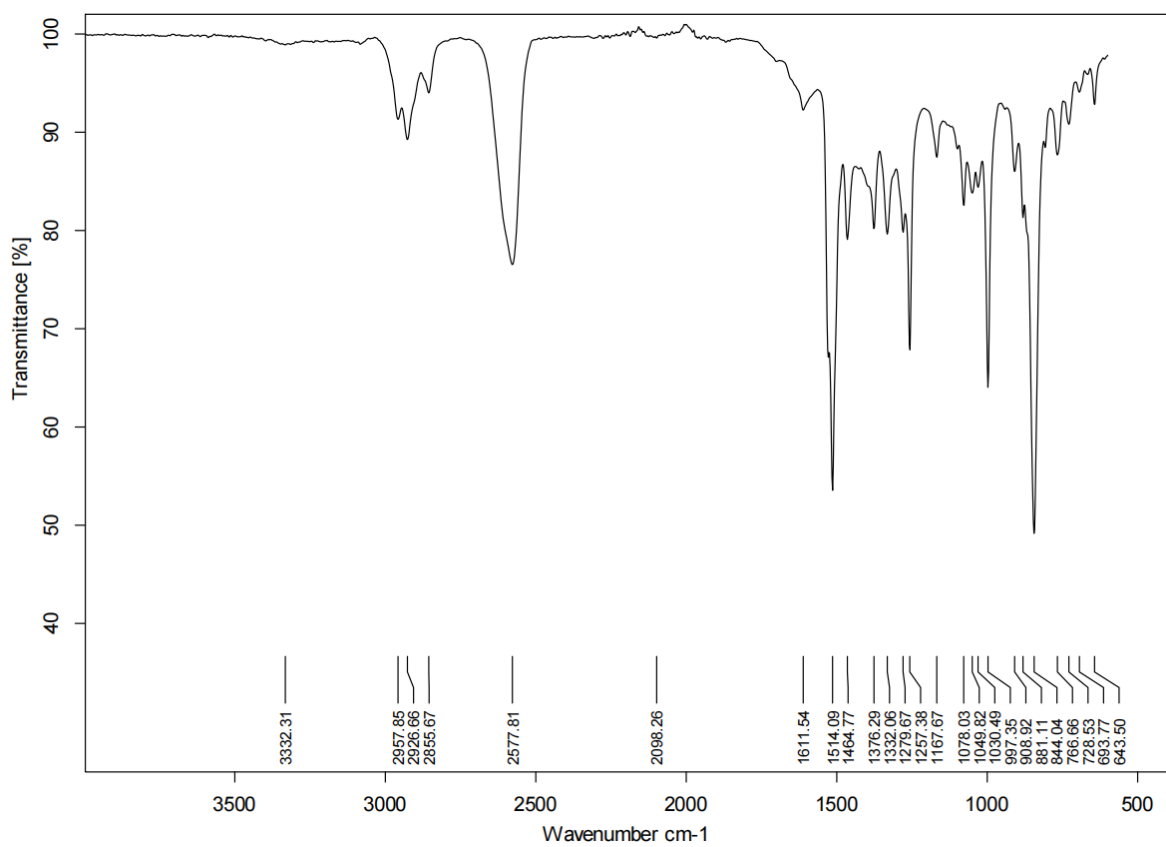

Figure S34. IR spectrum of 2d.

## Crystal structures

The crystal data of **2a**, **3**, **4** were collected on a Bruker D8 VENTURE diffractometer with graphite monochromated Mo K $\alpha$  radiation ( $\lambda = 0.71073 \text{ \AA}$ ) or Cu K $\alpha$  radiation ( $\lambda = 1.54184$ ). Data reduction, scaling and absorption corrections were performed using SAINT (Bruker, V8.38A, 2013). The structure was solved with the XT structure solution program using the Intrinsic Phasing solution method<sup>3</sup> and by using Olex2 as the graphical interface. The model was refined with the ShelXL program<sup>4</sup> using Least Squares minimization. All non-hydrogen atoms were refined anisotropically. Hydrogen atoms were included in structure factor calculations. All hydrogen atoms were assigned to idealized geometric positions.

The crystal data of **2b** were collected on a Rigaku XtaLAB Synergy-R diffractometer with a HPA area detector and multi-layer mirror monochromated CuK $\alpha$  radiation. The structure was solved using intrinsic phasing method<sup>5</sup>, refined with the ShelXL program<sup>7</sup> and expanded using Fourier techniques.

Crystallographic data have been deposited with the Cambridge Crystallographic Data as supplementary publication nos. CCDC-2278801 (**2a**), 2326703 (**2b**), 2278802 (**3**), 2278803 (**4**). These data can be obtained free of charge from The Cambridge Crystallographic Data Centre via Data <https://www.ccdc.cam.ac.uk>

**Table S1.** Crystal data and structure refinement.

| Identification code                         | <b>2a</b>                                                                      | <b>2b</b>                                                                                      |
|---------------------------------------------|--------------------------------------------------------------------------------|------------------------------------------------------------------------------------------------|
| Empirical formula                           | C <sub>20</sub> H <sub>45</sub> B <sub>11</sub> N <sub>4</sub> Si <sub>2</sub> | C <sub>14</sub> H <sub>31</sub> B <sub>11</sub> N <sub>4</sub> Si <sub>2</sub> Cl <sub>2</sub> |
| Formula weight                              | 516.69                                                                         | 501.42                                                                                         |
| Temperature/K                               | 100                                                                            | 100                                                                                            |
| Crystal system                              | triclinic                                                                      | triclinic                                                                                      |
| Space group                                 | P-1                                                                            | P-1                                                                                            |
| a/Å                                         | 12.0996(9)                                                                     | 10.0990(2)                                                                                     |
| b/Å                                         | 15.2353(12)                                                                    | 10.65880(10)                                                                                   |
| c/Å                                         | 17.5608(12)                                                                    | 13.6478(2)                                                                                     |
| α/°                                         | 105.518(3)                                                                     | 85.5810(10)                                                                                    |
| β/°                                         | 90.022(3)                                                                      | 72.4300(10)                                                                                    |
| γ/°                                         | 94.870(3)                                                                      | 72.3450(10)                                                                                    |
| Volume/Å <sup>3</sup>                       | 3107.0(4)                                                                      | 1334.42(4)                                                                                     |
| Z                                           | 4                                                                              | 2                                                                                              |
| ρ <sub>calc</sub> /cm <sup>3</sup>          | 1.105                                                                          | 1.248                                                                                          |
| μ/mm <sup>-1</sup>                          | 0.132                                                                          | 3.125                                                                                          |
| F(000)                                      | 1104.0                                                                         | 520.0                                                                                          |
| Crystal size/mm <sup>3</sup>                | 0.12 × 0.11 × 0.07                                                             | 0.13 × 0.1 × 0.09                                                                              |
| Radiation                                   | MoKα (λ = 0.71073)                                                             | CuKα (λ = 1.54184)                                                                             |
| 2θ range for data collection/°              | 4.484 to 50                                                                    | 6.794 to 150.44                                                                                |
| Index ranges                                | -14 ≤ h ≤ 14, -17 ≤ k ≤ 18, -20 ≤ l ≤ 20                                       | -12 ≤ h ≤ 12, -12 ≤ k ≤ 10, -16 ≤ l ≤ 16                                                       |
| Reflections collected                       | 10761                                                                          | 27112                                                                                          |
| Independent reflections                     | 10761 [R <sub>int</sub> = 0.1022, R <sub>sigma</sub> = 0.0905]                 | 5344 [R <sub>int</sub> = 0.0322, R <sub>sigma</sub> = 0.0189]                                  |
| Data/restraints/parameters                  | 10761/0/687                                                                    | 5344/0/304                                                                                     |
| Goodness-of-fit on F <sup>2</sup>           | 1.093                                                                          | 1.070                                                                                          |
| Final R indexes [I ≥ 2σ (I)]                | R <sub>1</sub> = 0.0947, wR <sub>2</sub> = 0.2072                              | R <sub>1</sub> = 0.0295, wR <sub>2</sub> = 0.0817                                              |
| Final R indexes [all data]                  | R <sub>1</sub> = 0.1314, wR <sub>2</sub> = 0.2209                              | R <sub>1</sub> = 0.0310, wR <sub>2</sub> = 0.0832                                              |
| Largest diff. peak/hole / e Å <sup>-3</sup> | 0.86/-0.48                                                                     | 0.35/-0.28                                                                                     |

**Table S2.** Crystal data and structure refinement.

| Identification code                         | <b>3</b>                                                                       | <b>4</b>                                                                       |
|---------------------------------------------|--------------------------------------------------------------------------------|--------------------------------------------------------------------------------|
| Empirical formula                           | C <sub>23</sub> H <sub>63</sub> B <sub>22</sub> N <sub>5</sub> Si <sub>4</sub> | C <sub>11</sub> H <sub>37</sub> B <sub>11</sub> N <sub>2</sub> Si <sub>3</sub> |
| Formula weight                              | 759.96                                                                         | 400.60                                                                         |
| Temperature/K                               | <b>100</b>                                                                     | <b>100</b>                                                                     |
| Crystal system                              | monoclinic                                                                     | monoclinic                                                                     |
| Space group                                 | P2 <sub>1</sub> /n                                                             | P2 <sub>1</sub> /c                                                             |
| a/Å                                         | 18.6315(18)                                                                    | 9.9271(3)                                                                      |
| b/Å                                         | 11.0376(10)                                                                    | 24.7750(6)                                                                     |
| c/Å                                         | 22.7392(17)                                                                    | 10.7243(3)                                                                     |
| α/°                                         | 90                                                                             | 90                                                                             |
| β/°                                         | 108.033(3)                                                                     | 109.3940(10)                                                                   |
| γ/°                                         | 90                                                                             | 90                                                                             |
| Volume/Å <sup>3</sup>                       | 4446.5(7)                                                                      | 2487.91(12)                                                                    |
| Z                                           | 4                                                                              | 4                                                                              |
| ρ <sub>calc</sub> /cm <sup>3</sup>          | 1.135                                                                          | 1.070                                                                          |
| μ/mm <sup>-1</sup>                          | 0.161                                                                          | 0.192                                                                          |
| F(000)                                      | 1608.0                                                                         | 856.0                                                                          |
| Crystal size/mm <sup>3</sup>                | 0.2 × 0.12 × 0.12                                                              | 0.4 × 0.4 × 0.4                                                                |
| Radiation                                   | MoKα (λ = 0.71073)                                                             | MoKα (λ = 0.71073)                                                             |
| 2θ range for data collection/°              | 4.348 to 50                                                                    | 4.65 to 49.518                                                                 |
| Index ranges                                | -22 ≤ h ≤ 20, -13 ≤ k ≤ 13, -26 ≤ l ≤ 27                                       | -11 ≤ h ≤ 11, -29 ≤ k ≤ 29, -12 ≤ l ≤ 12                                       |
| Reflections collected                       | 49782                                                                          | 41430                                                                          |
| Independent reflections                     | 7800 [R <sub>int</sub> = 0.1041, R <sub>sigma</sub> = 0.0621]                  | 4255 [R <sub>int</sub> = 0.0540, R <sub>sigma</sub> = 0.0243]                  |
| Data/restraints/parameters                  | 7800/0/499                                                                     | 4255/0/253                                                                     |
| Goodness-of-fit on F <sup>2</sup>           | 1.076                                                                          | 1.049                                                                          |
| Final R indexes [I ≥ 2σ (I)]                | R <sub>1</sub> = 0.0457, wR <sub>2</sub> = 0.1158                              | R <sub>1</sub> = 0.0316, wR <sub>2</sub> = 0.0822                              |
| Final R indexes [all data]                  | R <sub>1</sub> = 0.0795, wR <sub>2</sub> = 0.1297                              | R <sub>1</sub> = 0.0357, wR <sub>2</sub> = 0.0854                              |
| Largest diff. peak/hole / e Å <sup>-3</sup> | 0.33/-0.33                                                                     | 0.38/-0.33                                                                     |



## Computational details

All calculations were performed with the Gaussian 09 program.<sup>5</sup> GaussView was used to visualize the results, to measure calculated structural parameters, and to plot orbital surfaces. All structures were optimized using the B3LYP hybrid functional<sup>6</sup> and 6-31G\* basis set,<sup>7</sup> with the D3 dispersion correction.<sup>8</sup> Frequency calculations were performed to confirm that a transition state has only one imaginary frequency, while a local minimum has no imaginary frequency. Intrinsic reaction coordinate (IRC) calculations<sup>9</sup> were also carried out to further confirm that transition states can link the relevant local minima. Solvent effects of toluene were considered by carrying out single-point energy calculations using the SMD model<sup>10</sup> at the B3LYP-D3/6-311G\*\* level.<sup>11</sup>

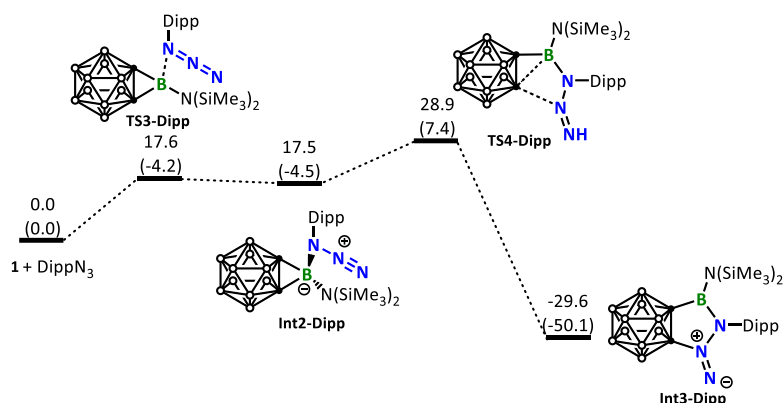

**Figure S35.** Energy profile calculated for the reaction of **1** with DippN<sub>3</sub> leading to the formation of Int3-Dipp. Relative free energies and electronic energies (in parentheses) are given in kcal/mol.

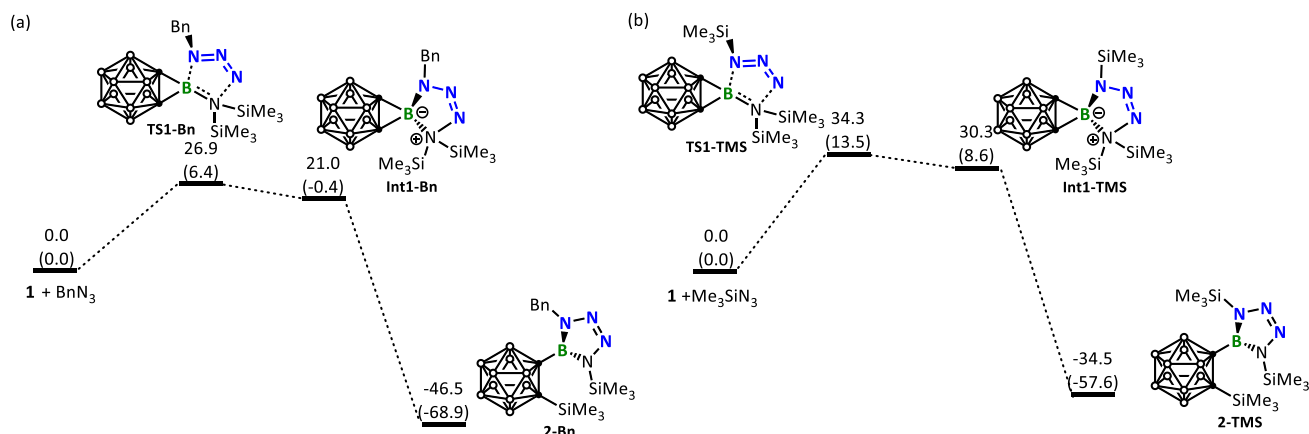

**Figure S36.** Energy profile calculated for the reaction of **1** with (a) BnN<sub>3</sub> and (b) SiMe<sub>3</sub>N<sub>3</sub> leading to the [3+2] cycloaddition intermediate **2-Bn** and **2-TMS**, respectively. Relative free energies and electronic energies (in parentheses) are given in kcal/mol.

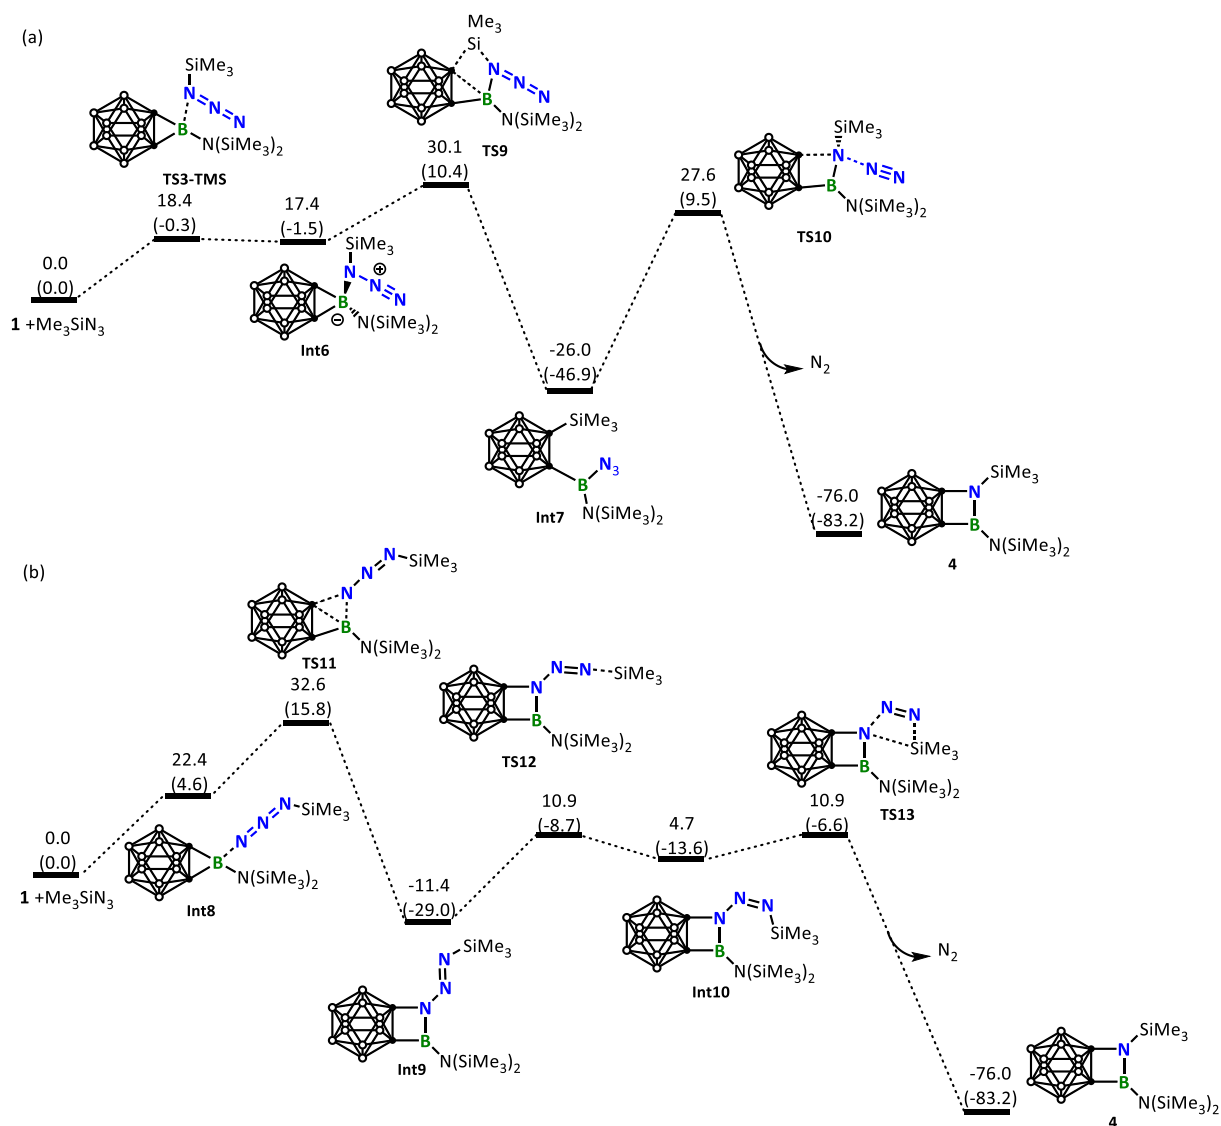

**Figure S37.** Energy profiles of less favorable pathways calculated for the reaction of **1** with  $\text{Me}_3\text{SiN}_3$  leading to the formation of **4**. Relative free energies and electronic energies (in parentheses) are given in kcal/mol.

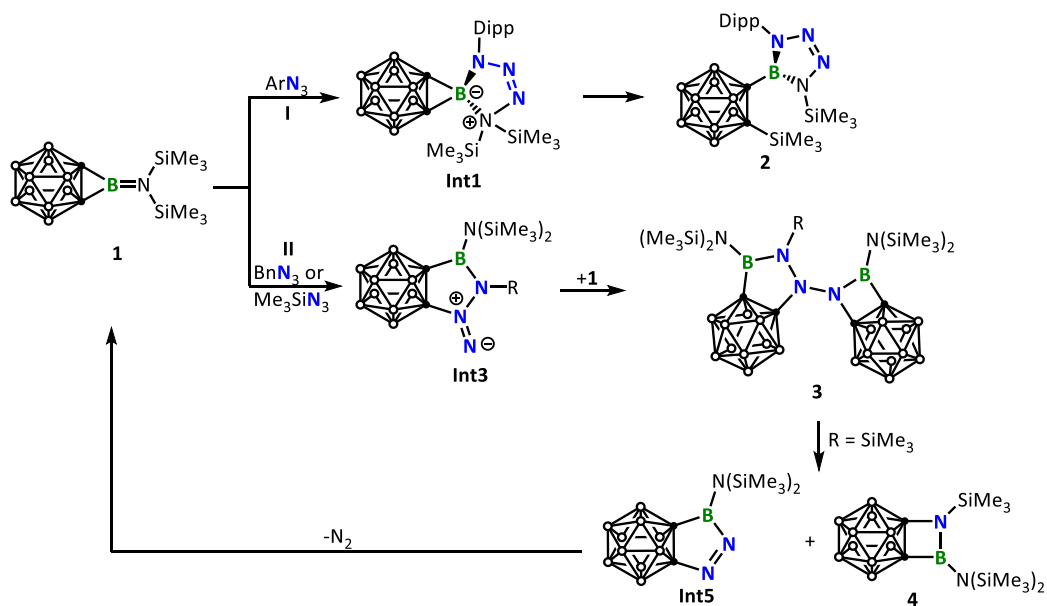

**Figure S38.** Summary of reaction mechanisms between **1** and  $\text{RN}_3$ .

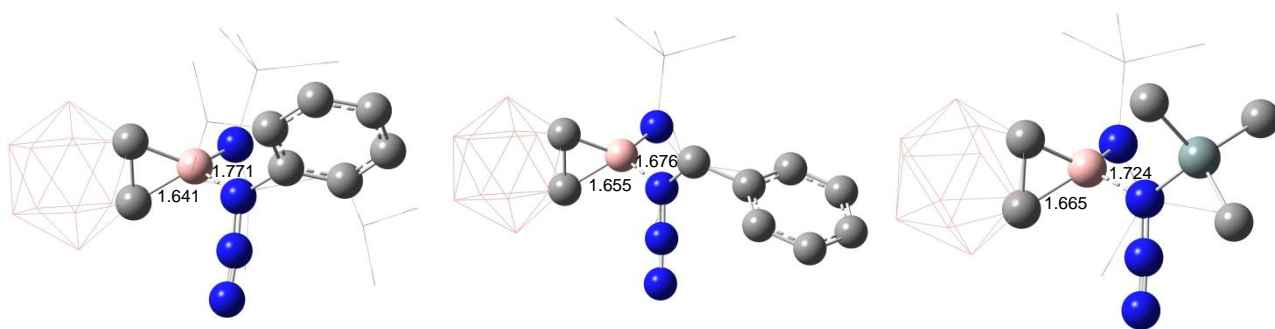

**Figure S39.** Bond distances of B-C and B-N<sub>α</sub> (Å) in optimized RN<sub>3</sub>-1 adducts.

**Cartesian coordinates**

**1**  
SCF Done: -1229.348264  
Si 1.98703700 -1.65257300 -0.00180700  
Si 2.23741600 1.57096400 -0.00815000  
N 1.31550600 0.02648000 -0.07684300  
C -1.39065600 -0.76401500 -0.00953000  
C -1.39491000 0.87194400 -0.05886800  
C 1.22866200 -2.65173300 -1.40412400  
H 0.14289300 -2.74492900 -1.30157100  
H 1.65219300 -3.66347900 -1.42351000  
H 1.43635700 -2.18436400 -2.37390500  
C 3.85935300 -1.62968400 -0.21738300  
H 4.14881300 -1.32919600 -1.22962100  
H 4.23430800 -2.64869000 -0.05899200  
H 4.37688900 -0.97924700 0.49496900  
C 3.10818200 1.65297400 1.66120200  
H 2.37632500 1.62883600 2.47720700  
H 3.67911500 2.58512100 1.75269200  
H 3.80517100 0.82173100 1.81301600  
C 1.53142100 -2.36099300 1.68071600  
H 1.95531100 -1.75589100 2.49081400  
H 1.90702700 -3.38520500 1.79350600  
H 0.44405300 -2.38660600 1.81520400  
B -0.05895000 0.06626800 -0.06320200  
C 3.47168100 1.63427600 -1.43080700  
H 4.31980000 0.95771300 -1.29091100  
C 3.87166000 2.65169200 -1.52329300  
H 2.98818800 1.38246400 -2.38203900  
C 1.03892100 3.01190800 -0.16914300  
H 0.46254600 2.96616800 -1.09948500  
H 1.60870100 3.94957300 -0.17367500  
H 0.32525200 3.05653600 0.65976400  
B -1.88998000 0.00917700 -1.48375400  
H -1.11817400 -0.01751500 -2.38548600  
B -3.56149200 0.09472000 1.47179000  
H -4.13758200 0.12504900 2.51114100  
B -2.71363000 1.48595800 -0.94482600  
H -2.59006400 2.48156700 -1.57799700  
B -2.66543700 -1.38072600 0.93777000  
H -2.50966100 -2.37607100 1.56493400  
B -3.63012700 0.00810500 -1.43607600  
H -4.25429800 -0.02334800 -2.44721800  
B -2.67124800 1.53905000 0.85050900  
H -2.51962300 2.57063100 1.41680500  
B -1.82194200 0.09646200 1.43799500  
H -1.00802900 0.12358700 2.30212800  
B -4.12423200 0.95388500 0.00315500  
H -5.13176200 1.58570300 0.00830500  
B -4.12091300 -0.85299100 0.05677400  
H -5.12573700 -1.48768600 0.09915600  
B -2.70748300 -1.43389900 -0.85743400  
H -2.57931700 -2.46510500 -1.43050300

H 3.79933700 -0.69616100 1.76605900  
H 2.57416600 0.44520600 2.35563500  
**TS1**  
SCF Done: -1861.255107  
B -1.04210200 2.09621300 0.11236700  
H -1.93790500 1.38939000 -0.12807300  
B 1.74724900 3.85985200 0.75427100  
H 2.74883000 4.46225500 0.97766100  
B -0.35236100 3.13343000 -1.10928500  
H -0.82482800 3.15189300 -2.19865200  
B 1.06981800 2.69957100 1.95918500  
H 1.55308600 2.43291600 3.00930700  
B -1.11338600 3.79022800 0.39740800  
H -2.16618600 4.34349300 0.36473800  
B 1.41347600 3.17413900 -0.88320000  
H 2.12840200 3.24300800 -1.82715100  
B 1.84003100 2.15886800 0.48285500  
H 2.79041000 1.46800900 0.48994900  
B 0.40229300 4.48815400 -0.22546500  
H 0.43417300 5.58063300 -0.69687700  
B 0.18428200 4.18847200 1.54493400  
H 0.06441500 5.06645500 2.33959000  
B -0.69762300 2.64541400 1.73935300  
H -1.41093100 2.33095000 2.63446000  
C 0.49764400 1.72699100 -0.56671300  
C 0.32718100 1.46570100 0.98702400  
B 0.53981900 0.16930600 -0.00218300  
N 1.71474900 -0.73926100 -0.13757500  
Si 2.56185200 -1.40915700 1.32067500  
Si 2.58510700 -0.74836100 -1.73302000  
C 4.38422200 -0.91276700 1.31441600  
H 4.84674600 -1.31336000 2.22548200  
H 4.94492100 -1.31052400 0.46321100  
H 4.51171200 0.17407700 1.32933800  
C 2.45805800 -3.29382900 1.36783200  
H 3.07653400 -3.65635000 2.19898700  
H 1.43221600 -3.63427300 1.54672900  
C 2.81347500 -3.77129600 0.45059300  
H 1.81461700 -3.78064800 2.92619400  
H 1.89983100 0.30102800 3.04045400  
H 0.76449200 -1.05430800 3.04945800  
H 2.37239300 1.25101000 3.74648400  
C 3.43326900 -2.41753100 -1.99551200  
H 3.92937200 -2.39084800 -2.97414300  
H 4.20675300 -2.63348100 -1.25135300  
H 2.72583600 -3.25148500 -2.00305800  
C 1.33738600 -0.48375500 -3.12276300  
H 0.56688600 -1.26072100 -3.15707600  
H 0.84715800 0.49124500 -3.04708200  
H 1.87313100 -0.51234500 -4.07972600  
C 3.91848700 0.57492100 -1.88045700  
H 4.43422500 0.41805400 -2.83742000  
H 3.51013900 1.58694400 -1.88531500  
H 4.66992900 0.51712500 -1.08822700

**DippN3**  
SCF Done: -631.913696  
N -0.00000400 -1.21217600 0.50988100  
N -0.00013300 -2.08787300 -0.35672600  
N 0.00047200 -3.00235500 -1.04087400  
C 0.00007700 0.17648500 0.09657200  
C -1.23529400 0.84171300 -0.04579400  
C 1.23541100 0.84159600 -0.04592200  
C -1.20222500 2.19626400 -0.40264200  
C 1.20241300 2.19617800 -0.40284300  
C 0.00012800 2.87032500 -0.59092900  
H -2.14260300 2.72726500 -0.52747000  
H 2.14282400 2.72707100 -0.52788700  
C 0.00017300 3.92123900 -0.86708100  
H -2.59821600 0.19189000 0.18550100  
H -3.32778400 1.00320700 0.06276000  
C 2.59831200 0.19171100 0.18533400  
H 3.32793300 1.00293600 0.06234900  
C -2.96650900 -0.87325800 -0.86584100  
H -2.39473900 -1.79696000 -0.74698700  
H -4.02646900 -1.13659300 -0.76966900  
H -2.80106900 -0.50023900 -1.88258800  
C -2.77178200 -0.34186600 1.61977500  
H -3.79920200 -0.69601700 1.76619300  
H -2.09112500 -1.17311500 1.82149700  
H -2.57377700 0.44508700 2.35579300  
C 2.96635200 -0.87377700 -0.86577500  
H 4.02624400 -1.13731700 -0.76951700  
H 2.39433300 -1.79730100 -0.74664000  
H 2.80100400 -0.50100500 -1.88261400  
C 2.77197100 -0.34184400 1.61966600  
H 2.09119300 -1.17296400 1.82158500

Si 2.56185200 -1.40915700 1.32067500  
Si 2.58510700 -0.74836100 -1.73302000  
C 4.38422200 -0.91276700 1.31441600  
H 4.84674600 -1.31336000 2.22548200  
H 4.94492100 -1.31052400 0.46321100  
H 4.51171200 0.17407700 1.32933800  
C 2.45805800 -3.29382900 1.36783200  
H 3.07653400 -3.65635000 2.19898700  
H 1.43221600 -3.63427300 1.54672900  
C 2.81347500 -3.77129600 0.45059300  
H 1.81461700 -3.78064800 2.92619400  
H 1.89983100 0.30102800 3.04045400  
H 0.76449200 -1.05430800 3.04945800  
H 2.37239300 1.25101000 3.74648400  
C 3.43326900 -2.41753100 -1.99551200  
H 3.92937200 -2.39084800 -2.97414300  
H 4.20675300 -2.63348100 -1.25135300  
H 2.72583600 -3.25148500 -2.00305800  
C 1.33738600 -0.48375500 -3.12276300  
H 0.56688600 -1.26072100 -3.15707600  
H 0.84715800 0.49124500 -3.04708200  
H 1.87313100 -0.51234500 -4.07972600  
C 3.91848700 0.57492100 -1.88045700  
H 4.43422500 0.41805400 -2.83742000  
H 3.51013900 1.58694400 -1.88531500  
H 4.66992900 0.51712500 -1.08822700  
N -0.83862600 -0.85136700 -0.20444700  
C -2.29853400 -0.77023500 -0.05371100  
C -2.84843400 -0.94394500 1.22524400  
C -3.07268100 -0.56397000 -1.20733700  
C -4.24442100 -0.94545200 1.32334400  
C -4.46251300 -0.58870200 -1.05734000  
C -5.04331600 -0.78250200 0.19388600  
H -4.71198300 -1.07416400 2.29374300  
H -5.09582000 -0.43971400 -1.92635400  
H -6.12536400 -0.79186500 0.29214100  
N -0.46976100 -2.01849700 -0.58529700  
N 0.47165700 -2.64700600 -0.79801000  
C -1.95697000 -1.13843300 2.44209000  
H -1.02434700 -0.60617800 2.23811300  
C -2.42408000 -0.29085300 -2.55630100  
H -1.38284400 -0.01593000 -2.36796200  
C -2.42721900 -1.55510500 -3.43620000  
H -3.45354000 -1.86659300 -3.66416700  
H -1.90980000 -1.36531100 -4.38346500  
H -1.92925600 -2.39516400 -2.93838700  
C -3.06640200 0.90005800 -3.28605700  
H -3.06825100 1.79289800 -2.65310700  
H -2.49759800 1.12860700 -4.19430700  
H -4.09837500 0.68902100 -3.58863400  
C -2.53667800 -0.53557600 3.73001000  
H -1.78321000 -0.57073200 4.52443900  
H -2.82601700 0.50930800 3.58204500  
H -3.41208300 -1.09121100 4.08572600  
C -1.62537000 -2.63139000 2.63965600  
H -0.94562600 -2.76779100 3.48876800

|                        |             |             |             |
|------------------------|-------------|-------------|-------------|
| H                      | -2.53840000 | -3.20405200 | 2.84008500  |
| H                      | -1.14921400 | -3.06651700 | 1.75417600  |
| <b>Int1</b>            |             |             |             |
| SCF Done: -1861.268649 |             |             |             |
| B                      | 1.07392500  | 2.17027200  | -0.13392300 |
| H                      | 2.02192900  | 1.49928400  | 0.00282300  |
| B                      | -1.86205900 | 3.78706500  | -0.49861400 |
| H                      | -2.91203400 | 4.33297600  | -0.62416400 |
| B                      | 0.40872400  | 3.11323300  | 1.18110500  |
| H                      | 0.95354800  | 3.11727400  | 2.23586800  |
| B                      | -1.19780400 | 2.72930000  | -1.80281700 |
| H                      | -1.74509700 | 2.46603100  | -2.82329600 |
| B                      | 1.01852200  | 3.88115600  | -0.33894300 |
| H                      | 2.03489100  | 4.49900700  | -0.34986200 |
| B                      | -1.36718600 | 3.05991400  | 1.07988000  |
| H                      | -2.01744100 | 3.04277500  | 2.07229600  |
| B                      | -1.81052200 | 2.07516300  | -0.30220300 |
| H                      | -2.70443100 | 1.31609600  | -0.28287300 |
| B                      | -0.48798200 | 4.45841200  | 0.41711300  |
| H                      | -0.55292800 | 5.52551800  | 0.94020200  |
| B                      | -0.37968400 | 4.25113300  | -1.37650400 |
| H                      | -0.36838400 | 5.17026600  | -2.13257800 |
| B                      | 0.58048900  | 2.77689100  | -1.70326400 |
| H                      | 1.24546100  | 2.54473800  | -2.65840800 |
| C                      | -0.40593100 | 1.68582100  | 0.63524300  |
| C                      | -0.31797000 | 1.50551400  | -0.94087700 |
| B                      | -0.33565000 | 0.15403800  | -0.00415300 |
| N                      | -1.54172300 | -0.90772100 | 0.12004900  |
| Si                     | -2.53417500 | -1.35566700 | -1.45475800 |
| Si                     | -2.54410700 | -0.89180900 | 1.74795300  |
| C                      | -4.25925900 | -0.60423800 | -1.42998200 |
| H                      | -4.74373600 | -0.93426100 | -2.35851300 |
| H                      | -4.87197100 | -0.97110900 | -0.60116900 |
| H                      | -4.26958100 | 0.48757700  | -1.42036700 |
| C                      | -2.71784400 | -3.22509900 | -1.54256200 |
| H                      | -3.36270300 | -3.44812600 | -2.40323400 |
| H                      | -1.75376300 | -3.71511800 | -1.70161200 |
| H                      | -3.17442600 | -3.66657800 | -0.65464800 |
| C                      | -1.59464200 | -0.81449900 | -2.97918600 |
| H                      | -1.39184600 | 0.25497600  | -3.03152200 |
| H                      | -0.65186900 | -1.35797700 | -3.07380000 |
| H                      | -2.21576600 | -1.08571900 | -3.84307700 |
| C                      | -3.46223600 | -2.53065700 | 1.86286800  |
| H                      | -3.91152100 | -2.58031800 | 2.86316000  |
| H                      | -4.28085100 | -2.61012600 | 1.14032000  |
| H                      | -2.79914900 | -3.38942500 | 1.74083500  |
| C                      | -1.29399900 | -0.72276700 | 3.13055300  |
| H                      | -0.54165100 | -1.51495800 | 3.11454100  |
| H                      | -0.79079000 | 0.24766100  | 3.09666800  |
| H                      | -1.83057900 | -0.78816100 | 4.08544500  |
| C                      | -3.82637000 | 0.47040400  | 1.90264200  |
| H                      | -4.40127300 | 0.21838600  | 2.80513200  |
| H                      | -3.38885800 | 1.45727700  | 2.05207600  |
| H                      | -4.53206900 | 0.52773700  | 1.07171600  |
| N                      | 0.83385800  | -0.83211300 | 0.12956700  |
| C                      | 2.28031900  | -0.74409300 | 0.05607100  |
| C                      | 2.90363000  | -0.85244900 | -1.19960500 |
| C                      | 3.01228500  | -0.59676600 | 1.24726100  |
| C                      | 4.30180200  | -0.83837400 | -1.23744900 |
| C                      | 4.40822800  | -0.59562800 | 1.16075400  |
| C                      | 5.04941600  | -0.71861800 | -0.06874200 |
| H                      | 4.81274100  | -0.92224800 | -2.19125900 |
| H                      | 4.99933000  | -0.48997700 | 2.06519800  |
| H                      | 6.13503500  | -0.71217100 | -0.11791000 |
| N                      | 0.41899600  | -2.07639200 | 0.35397800  |
| N                      | -0.81021000 | -2.26469200 | 0.38043400  |
| C                      | 2.08334300  | -1.00654500 | -2.47048500 |
| H                      | 1.10727900  | -0.55557800 | -2.27721100 |
| C                      | 2.31219300  | -0.44413100 | 2.58732000  |
| H                      | 1.28344000  | -0.14330200 | 2.38003600  |
| C                      | 2.26836400  | -1.79403700 | 3.32788200  |
| C                      | 3.28321400  | -2.14232300 | 3.55487600  |
| H                      | 1.72253100  | -1.70001900 | 4.27446500  |
| H                      | 1.78011800  | -2.56175100 | 2.71777500  |
| C                      | 2.92560900  | 0.65789700  | 3.46589100  |
| H                      | 2.97156600  | 1.61041300  | 2.92824500  |
| H                      | 2.31201800  | 0.80198500  | 4.36267100  |
| H                      | 3.93760000  | 0.40302400  | 3.80082900  |
| C                      | 2.67620800  | -0.26635100 | -3.67890700 |
| H                      | 1.96859700  | -0.29680900 | -4.51530100 |
| H                      | 2.87607700  | 0.78301000  | -3.44020100 |
| H                      | 3.60931000  | -0.72491900 | -4.02596900 |
| C                      | 1.86953000  | -2.50030200 | -2.78696300 |
| H                      | 1.24982700  | -2.62557600 | -3.68370100 |
| H                      | 2.83182000  | -2.99174000 | -2.97315000 |
| H                      | 1.38597600  | -3.02002200 | -1.95303400 |

|                        |             |             |
|------------------------|-------------|-------------|
| <b>TS2</b>             |             |             |
| SCF Done: -1861.263885 |             |             |
| B                      | -0.99017500 | 2.14267900  |
| H                      | -1.80643300 | 1.42639300  |
| B                      | 1.56962200  | 3.89854600  |
| H                      | 2.49783600  | 4.48828200  |
| B                      | -0.11916500 | 3.29351600  |
| H                      | -0.38478800 | 3.39564800  |
| B                      | 0.69518100  | 2.67897700  |
| H                      | 0.97590400  | 2.33645900  |
| B                      | -1.17493500 | 3.82721000  |
| H                      | -2.21688800 | 4.36972100  |
| B                      | 1.55463700  | 3.34554100  |
| H                      | 2.45013800  | 3.49892500  |
| B                      | 1.72092300  | 2.20565200  |
| H                      | 2.65881400  | 1.50583800  |
| B                      | 0.41328000  | 4.59961300  |
| H                      | 0.50605500  | 5.72485300  |
| B                      | -0.12988400 | 4.17366400  |
| H                      | -0.41739700 | 4.99420600  |
| B                      | -0.99737200 | 2.61998500  |
| H                      | -1.85870700 | 2.22119100  |
| C                      | 0.65343400  | 1.84564000  |
| C                      | 0.18894200  | 1.52109100  |
| B                      | 0.33370300  | 0.05574300  |
| N                      | 1.55302900  | -0.92234400 |
| Si                     | 2.59882900  | -1.30139900 |
| Si                     | 2.55793100  | -0.83764100 |
| C                      | 4.30037200  | -0.50936900 |
| H                      | 4.80687400  | -0.81490100 |
| H                      | 4.91183500  | -0.86535000 |
| H                      | 4.27538800  | 0.58186500  |
| C                      | 2.80180600  | -3.16446300 |
| H                      | 3.44474300  | -3.36626600 |
| H                      | 1.84372400  | -3.66528700 |
| H                      | 3.26930000  | -3.61159000 |
| C                      | 1.64572100  | -0.70367100 |
| H                      | 1.34487200  | 0.34299400  |
| H                      | 0.76130600  | -1.32020800 |
| H                      | 2.30149700  | -0.81564900 |
| C                      | 3.58492100  | -2.41784200 |
| H                      | 4.05778700  | -2.45418300 |
| H                      | 4.39178500  | -2.44356700 |
| H                      | 2.97321900  | -3.31546700 |
| C                      | 1.31795800  | -0.84922000 |
| H                      | 0.64244400  | -1.70800300 |
| H                      | 0.73783900  | 0.07607900  |
| H                      | 1.88002900  | -0.90971700 |
| C                      | 3.72686600  | 0.61382800  |
| H                      | 4.34860300  | 0.39137700  |
| H                      | 3.20564400  | 1.55240100  |
| H                      | 4.39712000  | 0.74508100  |
| N                      | -0.78906200 | -0.89673500 |
| C                      | -2.23209500 | -0.79022900 |
| C                      | -2.82757200 | -0.74233600 |
| C                      | -2.98773300 | -0.78217500 |
| C                      | -4.22465600 | -0.68158300 |
| C                      | -4.38018700 | -0.74070800 |
| C                      | -4.99474500 | -0.68628100 |
| H                      | -4.71767900 | -0.63664800 |
| H                      | -4.98966500 | -0.73693900 |
| H                      | -6.07833600 | -0.64326300 |
| N                      | -0.35045300 | -2.15117100 |
| N                      | 0.88319200  | -2.28990900 |
| C                      | -1.99543000 | -0.83780700 |
| H                      | -1.03668600 | -0.35120600 |
| C                      | -2.32089300 | -0.81216400 |
| H                      | -1.28540100 | -0.49749700 |
| C                      | -2.30622600 | -2.24372600 |
| H                      | -3.32876600 | -2.60511000 |
| H                      | -1.78095900 | -2.26912400 |
| H                      | -1.80961300 | -2.93715400 |
| H                      | -2.94760800 | 0.17639200  |
| H                      | -2.98314100 | 1.18827100  |
| H                      | -2.34826000 | 0.20521900  |
| H                      | -3.96507500 | -0.11481000 |
| C                      | -2.61129300 | -0.12051500 |
| H                      | -1.88839500 | -0.10203100 |
| H                      | -2.87916900 | 0.91245200  |
| H                      | -3.50737600 | -0.63412400 |
| C                      | -1.73038100 | -2.32151700 |
| H                      | -1.12722200 | -2.41748200 |
| H                      | -2.67817600 | -2.84492000 |
| H                      | -1.21248000 | -2.83477800 |
| <b>2a</b>              |             |             |
| SCF Done: -1861.375415 |             |             |
| B                      | -0.19216100 | 1.79563200  |
|                        |             | -1.17062400 |

|                        |             |             |             |                        |             |             |             |
|------------------------|-------------|-------------|-------------|------------------------|-------------|-------------|-------------|
| H                      | 0.56082300  | 2.23966000  | -0.38053000 | C                      | -2.03739100 | -0.67243700 | 0.42841800  |
| B                      | -2.51842300 | 0.30363800  | -3.11647800 | C                      | -0.11651600 | 2.58237000  | -2.26590200 |
| H                      | -3.35664400 | -0.24822200 | -3.75424500 | H                      | 0.78260900  | 2.08313400  | -2.64134100 |
| B                      | -1.58036600 | 2.69489800  | -1.81717800 | H                      | -0.18538600 | 3.54871300  | -2.78141700 |
| H                      | -1.74345000 | 3.80889900  | -1.44672000 | H                      | -0.98558900 | 1.99090600  | -2.56902000 |
| B                      | -1.10833300 | -0.57562900 | -2.49231200 | C                      | -1.61817300 | 3.97809100  | -0.02274000 |
| H                      | -0.90445900 | -1.73875300 | -2.58365800 | H                      | -2.54025100 | 3.54480500  | -0.41869500 |
| B                      | -0.29327800 | 2.15346400  | -2.90861200 | H                      | -1.48358400 | 4.96313500  | -0.48840500 |
| H                      | 0.46514000  | 2.92431900  | -3.40186700 | H                      | -1.75502600 | 4.13358200  | 1.05195600  |
| B                      | -2.93918800 | 1.56946900  | -1.94683400 | C                      | 2.32207900  | 1.50532400  | 2.38196400  |
| H                      | -4.04174300 | 1.90146900  | -1.66876700 | H                      | 2.83475700  | 0.68123100  | 1.87601800  |
| B                      | -2.37553100 | -0.00809500 | -1.37430800 | H                      | 2.59911800  | 1.46830800  | 3.44343000  |
| H                      | -3.03717800 | -0.71966300 | -0.70669900 | C                      | 2.70108700  | 2.44722300  | 1.97571800  |
| B                      | -2.00963600 | 1.99939900  | -3.39762300 | H                      | 1.41028900  | 3.96739700  | 0.00774800  |
| H                      | -2.49382100 | 2.67729000  | -4.24634600 | H                      | 1.42929800  | 4.28641800  | 1.05519600  |
| B                      | -0.87650000 | 0.67281500  | -3.73500100 | H                      | 1.37263600  | 4.87618800  | -0.60607700 |
| H                      | -0.52686100 | 0.37499500  | -4.83198700 | H                      | 2.35314000  | 3.45991600  | -0.20782900 |
| B                      | 0.24881000  | 0.55749800  | -2.36577600 | B                      | -0.78970500 | 0.27543900  | -0.05052600 |
| H                      | 1.36351900  | 0.17144000  | -2.37655500 | C                      | -0.37501200 | 2.73569800  | 3.19470400  |
| C                      | -1.79583600 | 1.43985200  | -0.66679100 | H                      | -0.08678000 | 3.73203100  | 2.84210900  |
| C                      | -0.71016200 | 0.16038200  | -1.00579800 | H                      | -0.08918100 | 2.66681400  | 4.25177400  |
| B                      | -0.08692300 | -0.72809200 | 0.14673500  | H                      | -1.46655100 | 2.66147900  | 3.13841200  |
| N                      | -0.62645700 | -1.84792200 | 0.86719000  | C                      | -0.02701400 | -0.30171100 | 3.01770400  |
| Si                     | -2.00030800 | -3.05240000 | 0.83332800  | H                      | -1.10633400 | -0.47281200 | 3.03375800  |
| Si                     | -2.36264400 | 1.94220900  | 1.12711700  | H                      | 0.33354800  | -0.30382200 | 4.05404800  |
| C                      | -3.54194200 | -2.33688000 | 1.64707200  | H                      | 0.44519500  | -1.14252000 | 2.50347100  |
| H                      | -4.34865400 | -3.07810700 | 1.58118200  | B                      | -3.01550100 | 0.76980200  | 0.56844100  |
| H                      | -3.36721100 | -2.13834700 | 2.71054500  | H                      | -2.56919400 | 1.68193900  | 1.15998200  |
| H                      | -3.90160800 | -1.41589100 | 1.18042300  | H                      | -3.88466300 | -1.97206500 | -1.21117900 |
| C                      | -1.42202400 | -4.53653300 | 1.82819700  | B                      | -4.17032100 | -2.94225600 | -1.83737800 |
| H                      | -2.19797400 | -5.31222900 | 1.80018400  | B                      | -3.49493900 | -0.70922700 | 1.37148300  |
| H                      | -0.50049000 | -4.95989800 | 1.41573200  | H                      | -3.43808300 | -0.77089100 | 2.55540300  |
| H                      | -1.22638400 | -4.27731900 | 2.87216600  | B                      | -3.28180900 | -0.47317300 | -2.03003400 |
| C                      | -2.32979200 | -3.60840200 | -0.93156900 | H                      | -3.08271300 | -0.34031900 | -3.19248300 |
| H                      | -2.80992400 | -2.85530900 | -1.55883300 | B                      | -4.66219400 | 0.28292800  | 0.41035900  |
| H                      | -1.40110900 | -3.91694200 | -1.42400000 | H                      | -5.50177300 | 0.93458700  | 0.94465000  |
| H                      | -2.98941900 | -4.48502300 | -0.89211900 | B                      | -3.01542200 | -2.10244100 | 0.37077700  |
| C                      | -1.71760800 | 0.80446000  | 2.48315200  | B                      | -2.63671500 | -3.10758600 | 0.87582100  |
| H                      | -2.05478000 | 1.23475100  | 3.43557100  | H                      | -2.23154300 | -1.51049900 | -1.08195700 |
| H                      | -2.13029000 | -0.20163600 | 2.41053900  | H                      | -1.30960900 | -2.06893900 | -1.54657500 |
| H                      | -0.63053700 | 0.71617300  | 2.53397100  | B                      | -4.69088400 | -1.49273400 | 0.30279100  |
| C                      | -1.74620100 | 3.69300900  | 1.44063900  | H                      | -5.59020500 | -2.12899300 | 0.75287400  |
| H                      | -0.67511900 | 3.78500200  | 1.23715300  | B                      | -4.85500600 | -0.47762200 | -1.18564500 |
| H                      | -2.26970800 | 4.42751300  | 0.82143700  | H                      | -5.87305200 | -0.39098800 | -1.79557500 |
| H                      | -1.91280800 | 3.95536300  | 2.49266700  | B                      | -3.75716200 | 0.92076400  | -1.02061500 |
| C                      | -4.24483600 | 1.87555400  | 1.15612500  | H                      | -3.88926000 | 1.99225900  | -1.51281600 |
| H                      | -4.59763500 | 2.02863300  | 2.18346500  | N                      | 0.60682300  | -0.73418700 | -0.91517700 |
| H                      | -4.69167200 | 2.64975400  | 0.52531300  | N                      | 0.53311700  | -0.74661700 | -2.16225400 |
| H                      | -4.62199100 | 0.90592900  | 0.81335500  | H                      | 0.33609200  | -0.69646900 | -3.27762300 |
| N                      | 1.21561100  | -0.57817900 | 0.71960300  | C                      | 1.85447000  | -1.23874200 | -0.32701500 |
| C                      | 2.43623400  | 0.07012800  | 0.31083900  | C                      | 3.07423600  | -0.57010700 | -0.55983500 |
| C                      | 3.24286900  | -0.59209800 | -0.63864600 | C                      | 1.76319300  | -2.39459500 | 0.47793800  |
| C                      | 2.81394900  | 1.29126900  | 0.89895600  | C                      | 4.21653900  | -1.08400400 | 0.06858000  |
| C                      | 4.44248500  | 0.02300800  | -1.01206800 | C                      | 2.93304500  | -2.84063800 | 1.10139000  |
| C                      | 4.02200900  | 1.86557300  | 0.48866800  | C                      | 4.14841900  | -2.19293200 | 0.90357300  |
| C                      | 4.82702300  | 1.24131200  | -0.45997000 | H                      | 5.17216200  | -0.59696800 | -0.09165600 |
| H                      | 5.08447000  | -0.45784900 | -1.74257700 | H                      | 2.89261900  | -3.71781100 | 1.73716200  |
| H                      | 4.33930000  | 2.81004000  | 0.91711600  | H                      | 5.04631100  | -2.55997100 | 1.39287000  |
| H                      | 5.76103100  | 1.70448700  | -0.76683200 | C                      | 3.20769000  | 0.62560800  | -1.49305500 |
| N                      | 1.36565700  | -1.51388300 | 1.72778400  | H                      | 2.23201000  | 1.11446600  | -1.55212900 |
| N                      | 0.32442900  | -2.22162200 | 1.81856000  | C                      | 0.47509400  | -3.19648100 | 0.58224700  |
| C                      | 2.87107500  | -1.96146800 | -1.19878000 | H                      | -0.35430400 | -2.49394600 | 0.54456000  |
| H                      | 1.78447000  | -2.07594300 | -1.12537400 | C                      | 0.32445400  | -3.99616200 | 1.88447100  |
| C                      | 1.96717100  | 1.93627200  | 1.98662000  | H                      | 1.02371000  | -4.83907100 | 1.93567100  |
| H                      | 0.92606400  | 1.67543700  | 1.77936900  | H                      | 0.47717900  | -3.36953800 | 2.76886200  |
| C                      | 2.32541900  | 1.34939200  | 3.36681900  | H                      | -0.68800100 | -4.40937600 | 1.93616200  |
| H                      | 3.36453600  | 1.58728600  | 3.62417000  | C                      | 0.35502900  | -4.13661600 | -0.63530600 |
| H                      | 1.67708600  | 1.77374100  | 4.14330800  | H                      | -0.61439100 | -4.64619900 | -0.62621400 |
| H                      | 2.21469000  | 0.26139400  | 3.37597100  | H                      | 0.43821600  | -3.59235200 | -1.58153100 |
| C                      | 2.05119500  | 3.46960700  | 2.00764900  | H                      | 1.14729500  | -4.89433000 | -0.61311300 |
| H                      | 1.84794500  | 3.89808200  | 1.01989500  | C                      | 3.62312100  | 0.16626700  | -2.90840600 |
| H                      | 1.31804100  | 3.87250100  | 2.71504400  | H                      | 3.64949400  | 1.02018500  | -3.59482900 |
| C                      | 3.03723500  | 3.82054400  | 2.33236900  | H                      | 4.62530500  | -0.27679700 | -2.87841200 |
| C                      | 3.23755900  | -2.14094200 | -2.68114600 | H                      | 2.94663200  | -0.58321100 | -3.32721100 |
| H                      | 2.82983200  | -3.08909200 | -3.04914200 | C                      | 4.21046700  | 1.67944900  | -0.98987200 |
| H                      | 2.83249100  | -1.33313900 | -3.29842100 | H                      | 4.12813000  | 2.58695700  | -1.59740100 |
| H                      | 4.32253000  | -2.17626400 | -2.83249300 | H                      | 4.03109500  | 1.94264900  | 0.05544900  |
| C                      | 3.51328400  | -3.07207000 | -0.34132800 | H                      | 5.24442100  | 1.32805200  | -1.07772400 |
| H                      | 3.21321500  | -4.06090900 | -0.70872600 |                        |             |             |             |
| H                      | 4.60696500  | -3.00817200 | -0.39216500 |                        |             |             |             |
| H                      | 3.21516700  | -2.98516600 | 0.70712300  |                        |             |             |             |
|                        |             |             |             | Int2-Dipp              |             |             |             |
|                        |             |             |             | SCF Done: -1861.269103 |             |             |             |
|                        |             |             |             | Si                     | -0.06520300 | 2.90853900  | -0.39397500 |
|                        |             |             |             | Si                     | 0.48558600  | 1.32663600  | 2.21696500  |
|                        |             |             |             | N                      | -0.03324300 | 1.37219000  | 0.51389500  |
|                        |             |             |             | C                      | -2.14308500 | 0.20938700  | -0.88528100 |
|                        |             |             |             | C                      | -2.00873500 | -0.66343300 | 0.42387400  |
|                        |             |             |             | C                      | -0.09679700 | 2.59450200  | -2.26114400 |
|                        |             |             |             | H                      | 0.79954300  | 2.10663400  | -2.65833500 |
| TS3-Dipp               |             |             |             |                        |             |             |             |
| SCF Done: -1861.268584 |             |             |             |                        |             |             |             |
| Si                     | -0.10480200 | 2.91626200  | -0.40440400 |                        |             |             |             |
| Si                     | 0.44817100  | 1.33716300  | 2.22549100  |                        |             |             |             |
| N                      | -0.08395700 | 1.38549400  | 0.52207300  |                        |             |             |             |
| C                      | -2.18522000 | 0.20794700  | -0.88516300 |                        |             |             |             |

|                        |             |             |             |                        |             |             |             |
|------------------------|-------------|-------------|-------------|------------------------|-------------|-------------|-------------|
| H                      | -0.17932500 | 3.56683800  | -2.76311800 | H                      | -1.46397700 | 4.11650600  | -0.93917700 |
| H                      | -0.96798200 | 2.00314600  | -2.55877400 | H                      | -0.04011200 | 4.87010100  | -1.67454600 |
| C                      | -1.56654500 | 3.98656100  | -0.00444800 | H                      | -0.19597200 | 4.81942700  | 0.08210900  |
| H                      | -2.49446200 | 3.57126900  | -0.40521500 | C                      | 0.93857800  | 3.10709000  | 2.57593100  |
| H                      | -1.41505000 | 4.97288300  | -0.46245300 | H                      | 1.87131000  | 2.53816600  | 2.49489000  |
| H                      | -1.70307700 | 4.13660400  | 1.07090900  | H                      | 0.77590200  | 3.33579000  | 3.63696400  |
| C                      | 2.36087400  | 1.48491800  | 2.38852600  | H                      | 1.07413000  | 4.06095800  | 2.05661900  |
| H                      | 2.87324800  | 0.65618500  | 1.88960300  | C                      | 2.36313200  | 2.95541800  | -0.53014000 |
| H                      | 2.63130600  | 1.45198700  | 3.45183000  | H                      | 2.46687700  | 3.76306900  | 0.20102500  |
| H                      | 2.74662900  | 2.42322600  | 1.97970900  | H                      | 2.89123300  | 3.26288800  | -1.44010800 |
| C                      | 1.45307500  | 3.95990700  | 0.01155800  | H                      | 2.86090700  | 2.07306700  | 0.11780300  |
| H                      | 1.47601400  | 4.27520900  | 1.06012900  | B                      | -0.56145400 | 0.17539900  | -0.05999400 |
| H                      | 1.41201400  | 4.87106000  | -0.59852400 | C                      | -2.06135800 | 3.23268500  | 1.97603100  |
| H                      | 2.39568900  | 3.45446900  | -0.20830300 | H                      | -1.81817900 | 4.25578300  | 1.67308200  |
| B                      | -0.71031900 | 0.23499400  | -0.08546300 | H                      | -2.45434600 | 3.27353400  | 2.99976200  |
| C                      | -0.32610700 | 2.72922400  | 3.19167100  | H                      | -2.86217200 | 2.86807600  | 1.32965300  |
| H                      | -0.03065300 | 3.72503500  | 2.84360600  | C                      | -0.73214700 | 0.65617900  | 3.11450700  |
| H                      | -0.03812900 | 2.65301900  | 4.24773200  | H                      | -1.50545700 | -0.05803200 | 2.82109400  |
| H                      | -1.41826800 | 2.66408100  | 3.13796200  | H                      | -0.98123100 | 1.02222500  | 4.11795700  |
| C                      | -0.00106800 | -0.30628600 | 3.01650800  | H                      | 0.22340600  | 0.12689200  | 3.18289000  |
| H                      | -1.08181100 | -0.46736600 | 3.03288400  | B                      | -2.91298000 | 0.77898600  | -0.80014500 |
| H                      | 0.35960500  | -0.30684700 | 4.05281200  | H                      | -2.48428000 | 1.87853400  | -0.85201000 |
| H                      | 0.46294800  | -1.15399200 | 2.50631700  | B                      | -3.76325800 | -2.47982600 | -0.59458700 |
| B                      | -2.94830900 | 0.79872400  | 0.56680000  | H                      | -4.02344000 | -3.63959500 | -0.52479500 |
| H                      | -2.47918100 | 1.70005100  | 1.15496300  | B                      | -3.54561800 | 0.08834000  | 0.70719700  |
| B                      | -3.90804700 | -1.92527500 | -1.19218500 | H                      | -3.57855300 | 0.74416200  | 1.69375100  |
| H                      | -4.22352000 | -2.89045300 | -1.81213200 | B                      | -3.05241300 | -1.76299800 | -2.08600000 |
| B                      | -3.46121000 | -0.66104900 | 1.37989300  | H                      | -2.75591600 | -2.37172800 | -3.06410400 |
| H                      | -3.39833400 | -0.71928700 | 2.56367900  | B                      | -4.58404300 | 0.28540700  | -0.74737200 |
| B                      | -3.26830700 | -0.44802900 | -2.02188600 | H                      | -5.44233000 | 1.10996700  | 0.72321400  |
| H                      | -3.07385600 | -0.32609600 | -3.18676900 | B                      | -3.04770300 | -1.61862200 | 0.80630800  |
| B                      | -4.60891500 | 0.35812900  | 0.42341300  | H                      | -2.73294500 | -2.09474800 | 1.85004000  |
| H                      | -5.42762900 | 1.03426200  | 0.95987800  | B                      | -2.10008600 | -1.97442600 | -0.64018100 |
| B                      | -3.03022900 | -2.07076900 | 0.38313500  | H                      | -1.15919900 | -2.68255200 | -0.59441100 |
| H                      | -2.67507500 | -3.08384900 | 0.88997700  | B                      | -4.68226800 | -1.19840400 | 0.24300000  |
| B                      | -2.24334200 | -1.50785400 | -1.07541400 | H                      | -5.63687500 | -1.43965200 | 0.91306900  |
| H                      | -1.34131900 | -2.09598300 | -1.54531100 | B                      | -4.69446700 | -1.30127500 | -1.55525700 |
| B                      | -4.68848400 | -1.41649900 | 0.32491900  | H                      | -5.66040400 | -1.62006800 | -2.17454000 |
| H                      | -5.60124100 | -2.02502000 | 0.78649500  | B                      | -3.55594300 | -0.07104200 | -2.17921200 |
| B                      | -4.83498300 | -0.40441700 | -1.16693300 | H                      | -3.61322100 | 0.49015100  | -3.22558800 |
| H                      | -5.85446000 | -0.29097100 | -1.77034800 | N                      | 0.62548700  | -0.76582200 | -0.58414400 |
| B                      | -3.69651300 | 0.96325700  | -1.01675000 | N                      | 0.45302700  | -1.35851200 | -1.70967200 |
| H                      | -3.80434900 | 2.03420300  | -1.51595700 | N                      | 0.55394500  | -1.91637600 | -2.68607500 |
| N                      | 0.55004800  | -0.71119500 | -0.89221500 | C                      | 1.87953300  | -1.05496000 | 0.14505200  |
| N                      | 0.46885600  | -0.74195000 | -2.14426700 | C                      | 3.12961700  | -0.66194400 | -0.38767600 |
| N                      | 0.29064900  | -0.70820600 | -3.26100700 | C                      | 1.76003600  | -1.68143500 | 1.40839100  |
| C                      | 1.80130700  | -1.24532000 | -0.32071900 | C                      | 4.23820500  | -0.74360500 | 0.46481400  |
| C                      | 3.02558300  | -0.59095600 | -0.57042500 | C                      | 2.90181400  | -1.71267500 | 2.21735800  |
| C                      | 1.70813600  | -2.41280800 | 0.46700600  | C                      | 4.12079700  | -1.21723500 | 1.76644900  |
| C                      | 4.17114800  | -1.12686100 | 0.03290500  | H                      | 5.20972700  | -0.43217200 | 0.09792700  |
| C                      | 2.88337400  | -2.87948700 | 1.06531000  | H                      | 2.83975400  | -2.15574600 | 3.20456300  |
| C                      | 4.10275100  | -2.24397700 | 0.85645400  | H                      | 4.99184200  | -1.24345300 | 2.41519300  |
| H                      | 5.13001100  | -0.65066500 | -0.13897700 | C                      | 3.35461800  | -0.32955400 | -1.85950200 |
| H                      | 2.84241900  | -3.76492500 | 1.68928100  | C                      | 2.43986400  | 0.10924000  | -2.26426800 |
| H                      | 5.00381700  | -2.62802600 | 1.32641800  | H                      | 0.51954700  | -2.47089700 | 1.80979300  |
| C                      | 3.16585700  | 0.60775700  | -1.49842400 | H                      | -0.37047000 | -1.93427500 | 1.48315000  |
| H                      | 2.19784800  | 1.11161400  | -1.54368200 | C                      | 0.36718700  | -2.73198300 | 3.31584900  |
| C                      | 0.41955400  | -3.21174100 | 0.58114400  | H                      | 1.11501600  | -3.44500300 | 3.68152700  |
| H                      | -0.40907400 | -2.50994800 | 0.54395600  | H                      | 0.44386000  | -1.81854000 | 3.91059100  |
| C                      | 0.27184100  | -4.00315400 | 1.88909500  | H                      | -0.61853900 | -3.16994800 | 3.50227900  |
| H                      | 0.96815700  | -4.84820700 | 1.94367200  | C                      | 0.55746300  | -3.82674200 | 1.06646500  |
| H                      | 0.42838500  | -3.37108900 | 2.76871500  | H                      | -0.37002500 | -4.38093300 | 1.24359400  |
| H                      | -0.74187400 | -4.41248300 | 1.94582600  | H                      | 0.67125400  | -3.70312900 | -0.01427500 |
| C                      | 0.29715600  | -4.15983500 | -0.63005100 | H                      | 1.40034700  | -4.42966000 | 1.42467200  |
| H                      | -0.67386000 | -4.66608200 | -0.61712800 | C                      | 3.66277900  | -1.64283100 | -2.62078400 |
| H                      | 0.38185500  | -3.62281200 | -1.58041600 | H                      | 3.72899100  | -1.45426900 | -3.69776300 |
| H                      | 1.08723900  | -4.91965800 | -0.60267800 | H                      | 4.62433000  | -2.04589400 | -2.28329800 |
| C                      | 3.56162400  | 0.14896500  | -2.91987000 | H                      | 2.91171300  | -2.42002900 | -2.45700900 |
| H                      | 3.58866700  | 1.00525500  | -3.60317200 | C                      | 4.49702800  | 0.66440700  | -2.13728900 |
| H                      | 4.56000100  | -0.30312200 | -2.90215400 | H                      | 4.46306100  | 0.96783000  | -3.18903700 |
| H                      | 2.87539000  | -0.59336800 | -3.33566300 | H                      | 4.43204500  | 1.56214100  | -1.52203700 |
| C                      | 4.19084000  | 1.64323400  | -1.00188500 | H                      | 5.47727700  | 0.20534900  | -1.96859700 |
| H                      | 4.11542400  | 2.55420500  | -1.60489500 |                        |             |             |             |
| H                      | 4.02732500  | 1.90474700  | 0.04618900  |                        |             |             |             |
| H                      | 5.21806200  | 1.27629800  | -1.10371200 |                        |             |             |             |
|                        |             |             |             | Int3-Dipp              |             |             |             |
|                        |             |             |             | SCF Done: -1861.341777 |             |             |             |
|                        |             |             |             | Si                     | 0.68385200  | 1.92796100  | -2.02133600 |
|                        |             |             |             | Si                     | -0.85733500 | 3.06907700  | 0.39350400  |
|                        |             |             |             | N                      | -0.23719900 | 1.66993700  | -0.51551400 |
|                        |             |             |             | C                      | -1.72001200 | -1.93944900 | 0.38722500  |
|                        |             |             |             | C                      | -1.91498300 | -0.39793900 | -0.03459100 |
|                        |             |             |             | C                      | 0.23795500  | 0.56158600  | -3.24289700 |
|                        |             |             |             | H                      | 0.44986700  | -0.44285400 | -2.87768600 |
|                        |             |             |             | H                      | 0.79238900  | 0.69779600  | -4.17928900 |
|                        |             |             |             | H                      | -0.83201000 | 0.61480800  | -3.47668200 |
|                        |             |             |             | C                      | 0.16017200  | 3.51587100  | -2.90868600 |
|                        |             |             |             | H                      | -0.89081000 | 3.46950200  | -3.21404000 |
|                        |             |             |             | H                      | 0.76182400  | 3.58778900  | -3.82435400 |
|                        |             |             |             | H                      | 0.31242800  | 4.44190400  | -2.34870800 |
| TS4-Dipp               |             |             |             |                        |             |             |             |
| SCF Done: -1861.250097 |             |             |             |                        |             |             |             |
| Si                     | 0.54336900  | 2.60645000  | -0.89632900 |                        |             |             |             |
| Si                     | -0.54156300 | 2.11520100  | 1.94356100  |                        |             |             |             |
| N                      | -0.13458300 | 1.47538000  | 0.31390700  |                        |             |             |             |
| C                      | -2.01175000 | -0.49442000 | -1.52867400 |                        |             |             |             |
| C                      | -2.02306800 | -0.43485100 | 0.07068700  |                        |             |             |             |
| C                      | 0.28474100  | 1.94307900  | -2.64326900 |                        |             |             |             |
| H                      | 0.86752800  | 1.05715100  | -2.90708500 |                        |             |             |             |
| H                      | 0.56302800  | 2.73425800  | -3.35080200 |                        |             |             |             |
| H                      | -0.76905500 | 1.69645600  | -2.80382200 |                        |             |             |             |
| C                      | -0.38274500 | 4.25164200  | -0.83487000 |                        |             |             |             |

|                       |             |             |             |                        |             |             |             |
|-----------------------|-------------|-------------|-------------|------------------------|-------------|-------------|-------------|
| C                     | 0.52098700  | 4.35194900  | 0.58863100  | H                      | 3.61311100  | 0.87344000  | -0.72851400 |
| H                     | 1.38782700  | 3.89824000  | 1.08338700  |                        |             |             |             |
| H                     | 0.16354600  | 5.16592400  | 1.23245000  |                        |             |             |             |
| H                     | 0.86513600  | 4.80083900  | -0.34691100 | TS1-Bn                 |             |             |             |
| C                     | 2.53658300  | 2.01171900  | -1.67577300 | SCF Done: -1664.60913  |             |             |             |
| H                     | 2.75939700  | 2.86030800  | -1.01761500 | B                      | 1.09717500  | 2.10728200  | 0.13022600  |
| H                     | 3.10381200  | 2.15186900  | -2.60470300 | H                      | 2.03995300  | 1.43343700  | 0.32807100  |
| H                     | 2.90573400  | 1.10693400  | -1.18414300 | B                      | -1.82897900 | 3.70956900  | -0.37002200 |
| B                     | -0.44346700 | 0.29929800  | -0.10720700 | H                      | -2.87089700 | 4.25796700  | -0.54109400 |
| C                     | -2.35014400 | 3.83991200  | -0.46859400 | B                      | 0.30235900  | 2.93514200  | 1.44041000  |
| H                     | -2.07196800 | 4.34939900  | -1.39588500 | H                      | 0.75474700  | 2.86090500  | 2.53555900  |
| H                     | -2.82761200 | 4.57925900  | 0.18674600  | B                      | -1.04476800 | 2.75826600  | -1.69273000 |
| C                     | -3.09866000 | 3.07936400  | -0.71574100 | H                      | -1.48794700 | 2.56602100  | -2.77765100 |
| H                     | -1.33704500 | 2.61799800  | 2.17045300  | B                      | 1.02770400  | 3.82569600  | 0.03825900  |
| H                     | -1.70493500 | 1.60256700  | 2.31752900  | H                      | 2.02919400  | 4.45676900  | 0.15555200  |
| H                     | -2.13378600 | 3.29724500  | 2.49759600  | B                      | -1.45739100 | 2.85784500  | 1.18129800  |
| H                     | -0.48623900 | 2.76641700  | 2.84324500  | H                      | -2.18712000 | 2.75113100  | 2.11063100  |
| B                     | -2.06411500 | -1.63198100 | -1.26217400 | B                      | -1.78715700 | 1.98782500  | -0.30608300 |
| H                     | -1.18022700 | -1.74376100 | -2.03211700 | H                      | -2.66850500 | 1.21890000  | -0.42785100 |
| B                     | -4.14940600 | -1.23936300 | 1.39642200  | B                      | -0.55073400 | 4.32094100  | 0.70371900  |
| H                     | -4.85999700 | -1.08910300 | 2.33634900  | H                      | -0.67550000 | 5.34360500  | 1.29962500  |
| B                     | -3.19644000 | -0.27865300 | -1.16562900 | B                      | -0.28598100 | 4.25391300  | -1.08375100 |
| H                     | -3.13194300 | 0.56820400  | -1.99234300 | H                      | -0.22950000 | 5.22834800  | -1.76451900 |
| B                     | -2.98800400 | -2.59207900 | 1.31866300  | B                      | 0.72289700  | 2.82002400  | -1.43530600 |
| H                     | -2.70746300 | -3.37675500 | 2.15966400  | H                      | 1.46896700  | 2.66719300  | -2.64792200 |
| B                     | -3.77928800 | -1.96139500 | -1.39700300 | C                      | -0.41677500 | 1.54236600  | 0.71073400  |
| H                     | -4.22598200 | -2.32550000 | -2.43577800 | C                      | -0.22769900 | 1.49662000  | -0.85696100 |
| B                     | -3.42826100 | 0.15739400  | 0.53937100  | B                      | -0.31915200 | 0.06845600  | -0.06858000 |
| B                     | -3.53958200 | 1.29159400  | 0.85184000  | N                      | -1.40170300 | -0.96092200 | 0.04151300  |
| H                     | -2.43260100 | -0.90688200 | 1.54568800  | Si                     | -2.01783100 | -1.66416800 | -1.51340100 |
| H                     | -1.75502700 | -0.58925500 | 2.45874400  | Si                     | -2.35842500 | -1.12927300 | 1.58013500  |
| B                     | -4.63775300 | -0.85274300 | -0.28530400 | C                      | -3.85702200 | -1.29451300 | -1.70624900 |
| H                     | -5.71745100 | -0.42586000 | -0.53722600 | H                      | -4.18689600 | -1.65928100 | -2.68713000 |
| B                     | -4.36239500 | -2.55338100 | 0.19360200  | H                      | -4.47468200 | -1.78768200 | -0.94864800 |
| H                     | -5.23833600 | -3.35116200 | 0.28306000  | H                      | -4.05834600 | -0.21934300 | -1.66483900 |
| B                     | -2.75823300 | -3.03610700 | -0.40098800 | C                      | -1.74657900 | -3.53062700 | -1.58290900 |
| H                     | -2.32752600 | -4.10653500 | -0.66822800 | H                      | -2.23539400 | -3.92354000 | -2.48367300 |
| N                     | 0.50760700  | -0.68303800 | 0.18450800  | H                      | -0.68280700 | -3.78323900 | -1.64939800 |
| N                     | -0.30197100 | -2.21266900 | 0.65655100  | H                      | -2.16048200 | -4.05786200 | -0.71944600 |
| N                     | 0.24781000  | -3.14225200 | 1.07668500  | C                      | -1.08702500 | -0.90144800 | -2.96266600 |
| C                     | 1.86914700  | -0.80852500 | 0.44600000  | H                      | -1.28515400 | 0.16779100  | -3.07207800 |
| C                     | 2.67280600  | -1.61356000 | -0.40439800 | H                      | -0.00291000 | -1.03447700 | -2.88358100 |
| C                     | 2.42601900  | -0.22505900 | 1.61990000  | H                      | -1.41207800 | -1.40296300 | -3.88294000 |
| C                     | 4.02817100  | -1.77117700 | -0.09424200 | C                      | -3.01064900 | -2.89848300 | 1.69671100  |
| C                     | 3.78542200  | -0.40579500 | 1.87484200  | H                      | -3.54764900 | -3.00069600 | 2.64825300  |
| C                     | 4.58620600  | -1.16862100 | 1.02621900  | H                      | -3.72183700 | -3.14562900 | 0.90092300  |
| H                     | 4.65386600  | -2.37707900 | -0.74317500 | H                      | -2.20858300 | -3.64187300 | 1.68357900  |
| H                     | 4.22904300  | 0.04364000  | 2.75731800  | C                      | -1.23277600 | -0.78222700 | 3.05012900  |
| H                     | 5.64219600  | -1.29937800 | 1.24727300  | H                      | -0.38677600 | -1.47601400 | 3.10050900  |
| C                     | 2.12475100  | -2.29199400 | -1.65158800 | H                      | -0.84109000 | 0.23841000  | 3.00055000  |
| H                     | 1.06683200  | -2.03078500 | -1.73529700 | H                      | -1.81228100 | -0.90076900 | 3.97426000  |
| C                     | 1.55791900  | 0.53018800  | 2.61289200  | C                      | -3.86080100 | 0.00505500  | 1.66833100  |
| H                     | 0.69160400  | 0.90993100  | 2.07243400  | H                      | -4.45580200 | -0.30386700 | 2.53815500  |
| C                     | 2.25826400  | 1.74155300  | 3.24749200  | H                      | -3.59480700 | 1.05517800  | 1.80115100  |
| C                     | 3.06555500  | 1.44236200  | 3.92548100  | H                      | -4.50084400 | -0.07493700 | 0.78530200  |
| H                     | 2.68457900  | 2.40139600  | 2.48413800  | N                      | 1.07613900  | -0.77561600 | -0.18808700 |
| H                     | 1.54220800  | 2.32054000  | 3.84130400  | N                      | 0.95796100  | -1.96334300 | 0.32144300  |
| C                     | 1.03931900  | -0.43269600 | 3.69975300  | C                      | 0.07694600  | -2.59505600 | 0.73454900  |
| H                     | 0.34138400  | 0.08226700  | 4.37072200  | N                      | -0.25001100 | -0.61146600 | -1.06789800 |
| H                     | 0.52275100  | -1.29099700 | 3.25940000  | H                      | 2.17458700  | -1.34021800 | -1.88480700 |
| H                     | 1.87136500  | -0.81884300 | 4.30034800  | H                      | 2.14620700  | 0.37525800  | -1.51779800 |
| C                     | 2.21671400  | -3.82711800 | -1.55793700 | C                      | 3.58582700  | -0.75905100 | -0.36579300 |
| H                     | 1.76727800  | -4.28794700 | -2.44549400 | C                      | 3.73253800  | -0.58028700 | 1.10358900  |
| H                     | 3.26072800  | -4.15734000 | -1.50369300 | C                      | 4.71434900  | -1.05846400 | -1.13864600 |
| H                     | 1.70040500  | -4.20538000 | -0.67130000 | C                      | 4.99039700  | -0.69538600 | 1.60860600  |
| C                     | 2.84059600  | -1.79024600 | -2.92149800 | H                      | 2.86657500  | -0.34746100 | 1.62508500  |
| H                     | 2.35910800  | -2.19969200 | -3.81715000 | C                      | 5.97103800  | -1.16773200 | -0.54533200 |
| H                     | 2.82085000  | -0.69890900 | -2.99093000 | H                      | 4.60881300  | -1.20717600 | -2.21138000 |
| H                     | 3.88958000  | -2.10746100 | -2.93291300 | C                      | 6.11230000  | -0.98692300 | 0.83264500  |
|                       |             |             |             | H                      | 5.09023400  | -0.55384200 | 2.68114500  |
|                       |             |             |             | H                      | 6.83793300  | -1.40043600 | -1.15760600 |
|                       |             |             |             | H                      | 7.09019700  | -1.07628500 | 1.29735900  |
| BnN3                  |             |             |             |                        |             |             |             |
| SCF Done: -435.271127 |             |             |             |                        |             |             |             |
| N                     | -2.23576000 | -0.78546900 | -0.09930000 | Int1-Bn                |             |             |             |
| N                     | -2.38774500 | 0.38333900  | -0.46997600 | SCF Done: -1664.620048 |             |             |             |
| N                     | -2.60976900 | 1.42267400  | -0.88928100 | B                      | 1.45961000  | 1.87360600  | -0.43849900 |
| C                     | -1.17798200 | -0.98049300 | 0.93914800  | H                      | 2.30137700  | 1.12936500  | -0.75837000 |
| H                     | -1.49226900 | -0.49651800 | 1.87336700  | B                      | -1.14839100 | 3.74175100  | 0.57868100  |
| H                     | -1.16757400 | -2.05903500 | 1.10817100  | H                      | -2.08703600 | 4.37636000  | 0.94226300  |
| C                     | 0.17988200  | -0.47892800 | 0.50657800  | B                      | 1.39048700  | 2.47830300  | 1.19790300  |
| C                     | 0.63115200  | 0.78334900  | 0.90833100  | H                      | 2.22895200  | 2.15516500  | 1.97323200  |
| C                     | 0.97767800  | -1.24604000 | -0.35248900 | B                      | -1.09342200 | 3.02196600  | -1.07890700 |
| C                     | 1.86306800  | 1.27003400  | 0.46632700  | H                      | -1.95462800 | 3.08125200  | -1.89464600 |
| H                     | 0.01733900  | 1.38685900  | 1.57331300  | B                      | 1.61836600  | 3.57576500  | -0.22294500 |
| C                     | 2.20801600  | -0.76301500 | -0.79454800 | H                      | 2.66660300  | 4.09525900  | -0.43686500 |
| H                     | 0.62676900  | -2.22285800 | -0.67692000 | B                      | -0.31480300 | 2.58226700  | 1.68905300  |
| C                     | 2.65335600  | 0.49711100  | -0.38501800 | H                      | -0.63197300 | 2.33806100  | 2.80695800  |
| H                     | 2.20375600  | 2.25052100  | 0.78760000  | B                      | -1.30913800 | 4.20408400  | 0.35603200  |
| H                     | 2.82075800  | -1.36832400 | -1.45710200 | H                      | -2.25992700 | 1.37595400  | 0.51247200  |



|                        |             |             |             |                        |             |              |             |
|------------------------|-------------|-------------|-------------|------------------------|-------------|--------------|-------------|
| B                      | 0.52640600  | 4.04090900  | 1.10546900  | H                      | 1.83676300  | 4.84233200   | -0.87629800 |
| H                      | 0.79503100  | 4.93124500  | 1.84829700  | H                      | 2.80581200  | 4.61461300   | 0.58204700  |
| B                      | 0.04601900  | 4.31168600  | -0.61792100 | C                      | 2.58811300  | 2.10875700   | -2.53171900 |
| H                      | -0.03144800 | 5.39621200  | -1.10177800 | H                      | 2.62430800  | 1.05048700   | -2.79339900 |
| B                      | 0.61500800  | 2.91152700  | -1.57488100 | H                      | 1.71821800  | 2.55326200   | -3.02639600 |
| H                      | 0.91259900  | 2.89502900  | -2.72428200 | H                      | 3.48342500  | 2.58986600   | -2.94767200 |
| C                      | 0.23677800  | 1.30930400  | 0.63802000  | C                      | 1.68336700  | -0.46864100  | 2.62999800  |
| C                      | -0.20193200 | 1.55584200  | -0.87013500 | H                      | 2.27119400  | -0.65173100  | 3.53898700  |
| B                      | -0.14938800 | 0.00762500  | -0.33491200 | H                      | 2.15777600  | 0.35757200   | 2.09429300  |
| N                      | -1.40296000 | -0.94882600 | -0.02638900 | H                      | 0.68822700  | -0.14223600  | 2.94393800  |
| Si                     | -2.75271800 | -0.91023100 | -1.37057100 | C                      | 0.79282600  | -3.40174800  | 2.67361100  |
| Si                     | -1.83450900 | -1.26118400 | 1.80415900  | H                      | -0.27837100 | -3.19379600  | 2.76976900  |
| C                      | -3.95552600 | 0.52048900  | -1.19855900 | H                      | 0.90184600  | -4.39613900  | 2.23057200  |
| H                      | -4.76211200 | 0.32354100  | -1.91839400 | H                      | 1.22368100  | -3.42991200  | 3.68195000  |
| H                      | -4.41379500 | 0.58152900  | -0.20698400 | C                      | 3.43389400  | -2.548436100 | 1.26220200  |
| H                      | -3.51957100 | 1.49152700  | -1.43746700 | H                      | 4.02821900  | -2.57697700  | 2.18409000  |
| C                      | -3.75428700 | -2.49856400 | -1.28007000 | H                      | 3.48705800  | -3.58957900  | 0.83355100  |
| H                      | -4.29987800 | -2.59206000 | -2.22824800 | H                      | 3.90457600  | -1.89354100  | 0.55459500  |
| H                      | -3.13295100 | -3.38707500 | -1.15502700 | N                      | -0.78615700 | 1.35176600   | 1.28856900  |
| -4.50024500            | -2.47426700 | -0.47999900 | N           | -0.35524100            | 2.58226600  | 1.72056500   |             |
| C                      | -1.80676400 | -0.80139700 | -2.98797300 | N                      | 0.67316000  | 2.93299700   | 1.07593800  |
| H                      | -1.26662600 | 0.14541600  | -3.07684600 | C                      | -1.99846700 | 0.87681000   | 1.95674200  |
| H                      | -1.09297100 | -1.62293100 | -3.10087400 | H                      | -1.82521300 | -0.12978300  | 2.34378000  |
| H                      | -2.52215400 | -0.86285700 | -3.81722900 | H                      | -2.13131500 | 1.54023100   | 2.81713800  |
| C                      | -2.77891800 | -2.88313200 | 1.94002800  | C                      | -3.22410400 | 0.90434100   | 1.06766300  |
| H                      | -2.79382500 | -3.15425400 | 3.00400200  | C                      | -3.49056000 | 2.02536900   | 0.27245500  |
| H                      | -3.82024200 | -2.78916600 | 1.61859800  | C                      | -4.09814900 | -0.18452800  | 1.02851200  |
| H                      | -2.31226900 | -3.69832900 | 1.38495500  | C                      | -4.60601600 | 2.04630500   | -0.56288000 |
| C                      | -0.17654000 | -1.38715600 | 2.67148600  | H                      | -2.81250400 | 2.87436900   | 0.29942400  |
| H                      | 0.49025000  | -2.09012100 | 2.16205100  | C                      | -5.21760600 | -0.16429600  | 0.19457600  |
| H                      | 0.32315000  | -0.41736600 | 2.73697400  | H                      | -3.89295000 | -1.06267800  | 1.63558300  |
| H                      | -0.33778300 | -1.75982800 | 3.69043100  | C                      | -5.47040700 | 0.94892000   | -0.60737200 |
| C                      | -2.94045400 | 0.04794600  | 2.57366800  | H                      | -4.79913800 | 2.91719300   | -1.18344700 |
| H                      | -3.28200500 | -0.37317800 | 3.52932500  | H                      | -5.88157400 | -1.02363500  | 0.16167100  |
| H                      | -2.43784200 | 0.99305900  | 2.78018000  | H                      | -6.33416200 | 0.96168100   | -1.26636000 |
| H                      | -3.83306100 | 0.25262200  | 1.97444200  |                        |             |              |             |
| N                      | 0.79444600  | -1.06318200 | -0.89177700 | <b>TS3</b>             |             |              |             |
| N                      | 0.29823500  | -2.28654400 | -0.77629500 | SCF Done: -1664.621982 |             |              |             |
| N                      | -0.85784800 | -2.38260900 | -0.32400400 | Si                     | -0.18164800 | 2.01585900   | 1.66119200  |
| C                      | 2.07431100  | -1.06342400 | -1.60940500 | Si                     | 0.52843800  | 2.43766300   | -1.36491800 |
| H                      | 2.04153200  | -1.91366700 | -2.29722600 | N                      | 0.40723100  | 1.40858400   | 0.08764100  |
| H                      | 2.11432000  | -0.16212600 | -2.22484400 | C                      | 1.83662200  | -0.97460800  | 0.75140400  |
| C                      | 3.30474400  | -1.18087500 | -0.72682000 | C                      | 1.95592500  | -0.72151500  | -0.82363400 |
| C                      | 3.24760900  | -1.02605100 | 0.66062200  | C                      | 0.38307500  | 0.86949500   | 3.04524600  |
| C                      | 4.54058800  | -1.44048200 | -1.33125600 | H                      | -0.05290800 | -0.13228000  | 2.97952900  |
| C                      | 4.40669300  | -1.12907400 | 1.43232100  | H                      | 0.07677200  | 1.29859600   | 4.00746400  |
| H                      | 2.29857100  | -0.81201300 | 1.13910900  | H                      | 1.47139400  | 0.75316300   | 3.05903700  |
| C                      | 5.69920100  | -1.54220400 | -0.56276900 | H                      | 0.51985400  | 3.73718000   | 1.99191400  |
| H                      | 4.59578900  | -1.56452400 | -2.41117800 | H                      | 1.61546400  | 3.72551600   | 1.98776300  |
| C                      | 5.63514800  | -1.38746200 | 0.82448700  | H                      | 0.19344400  | 4.07732800   | 2.98253700  |
| H                      | 4.34602800  | -1.00176000 | 2.50978800  | H                      | 0.18691300  | 4.48473200   | 1.26398300  |
| H                      | 6.65134600  | -1.74465700 | -1.04595500 | C                      | -1.05652600 | 3.45965200   | -1.52538800 |
| H                      | 6.53717400  | -1.46725400 | 1.42494200  | H                      | -1.94213000 | 2.81635500   | -1.60058400 |
|                        |             |             |             | H                      | -1.01067700 | 4.06664200   | -2.43795900 |
|                        |             |             |             | H                      | -1.21294200 | 4.14406900   | -0.68500500 |
|                        |             |             |             | C                      | -2.06938000 | 2.10177600   | 1.67810500  |
| <b>2-Bn</b>            |             |             |             | H                      | -2.46152300 | 2.76381100   | 0.89865800  |
| SCF Done: -1664.729206 |             |             |             | H                      | -2.42042700 | 2.48341900   | 2.64508500  |
| B                      | -0.99690900 | -1.76479600 | -0.01721600 | H                      | -2.51221700 | 1.11125200   | 1.53167500  |
| H                      | -1.53426300 | -1.68537100 | 1.02995400  | B                      | 0.83205000  | 0.05674900   | 0.02033000  |
| B                      | 0.88316800  | -1.84014000 | -2.81816000 | C                      | 2.02031800  | 3.58534100   | -1.26214600 |
| H                      | 1.58613100  | -1.83731200 | -3.77726900 | H                      | 1.97432200  | 4.26329900   | -0.40443300 |
| B                      | -0.22352600 | -3.26085000 | -0.57459500 | H                      | 2.08586300  | 4.19713200   | -2.17081800 |
| H                      | -0.28009200 | -4.21219700 | 0.12986400  | H                      | 2.94637500  | 3.00551700   | -1.18361600 |
| B                      | 0.07195600  | -0.36120300 | -2.26726700 | C                      | 0.70570800  | 1.39515800   | -2.92811900 |
| H                      | 0.18782800  | 0.72046000  | -2.73078900 | H                      | 1.70091700  | 0.94936500   | -3.00856200 |
| B                      | -1.58484000 | -2.57720700 | -1.48302400 | H                      | 0.56093300  | 2.04867100   | -3.79787500 |
| H                      | -2.65067000 | -3.10359100 | -1.48587500 | H                      | -0.02532400 | 0.58346200   | -2.99993200 |
| B                      | 1.28062100  | -2.81415400 | -1.38966200 | B                      | 3.14481000  | 0.06011300   | 0.22611900  |
| B                      | 2.26951500  | -3.45256300 | -1.24913300 | H                      | 3.03430300  | 1.21813100   | 0.42146000  |
| B                      | 1.41554300  | -1.05082100 | -1.32084300 | B                      | 2.95354200  | -3.26823600  | -0.37157800 |
| B                      | 2.43568600  | -0.49846000 | -1.10852200 | H                      | 2.87316600  | -4.43659400  | -0.57999500 |
| H                      | -0.15575600 | -3.22377600 | -2.35082300 | B                      | 3.60445500  | -0.60676200  | -1.33664000 |
| H                      | -0.19507900 | -4.23310500 | -2.97860900 | H                      | 3.90781400  | 0.13188000   | -2.21542700 |
| B                      | -0.90231900 | -1.70623900 | -2.89241500 | B                      | 2.37508700  | -2.55232400  | 1.19018200  |
| H                      | -1.48930700 | -1.59992600 | -3.92116300 | H                      | 1.84948800  | -3.14023200  | 2.07637300  |
| B                      | -1.43889600 | -0.80885600 | -1.45365400 | B                      | 4.55958200  | -0.92760000  | 0.16574400  |
| H                      | -2.32720200 | -0.03383500 | -1.37541500 | H                      | 5.62015400  | -0.41815100  | 0.34041100  |
| C                      | 0.70929300  | -1.92538900 | -0.03168500 | B                      | 2.61793900  | -2.05714500  | -1.67536600 |
| C                      | -0.01134700 | -0.46507500 | -0.56739600 | H                      | 2.25281800  | -2.29549100  | -2.77934800 |
| B                      | 0.08457600  | 0.88699500  | 0.25491900  | B                      | 1.51789700  | -2.31447800  | -0.33093000 |
| N                      | 1.02856200  | 1.96484600  | 0.13632500  | H                      | 0.40878100  | -2.67285100  | -0.51215800 |
| Si                     | 2.57979500  | 2.47008300  | -0.68761700 | B                      | 4.26250900  | -2.23238400  | -1.00631600 |
| Si                     | 1.66271800  | -2.07996300 | 1.65357800  | H                      | 5.14208400  | -2.68764300  | -1.66585100 |
| C                      | 3.99829300  | 1.61784700  | 0.21401500  | H                      | 4.11407300  | -2.54391600  | 0.77094600  |
| H                      | 4.95832800  | 1.94023500  | -0.20783100 | B                      | 4.89122600  | -3.21667600  | 1.37024900  |
| H                      | 3.99380500  | 1.89216500  | 1.27541400  | B                      | 3.37223100  | -1.10522700  | 1.52036300  |
| C                      | 3.95473700  | 0.52685600  | 0.14499500  | H                      | 3.51323000  | -0.71581500  | 2.63277000  |
| H                      | 2.71575200  | 4.33092500  | -0.46942100 |                        |             |              |             |
| H                      | 3.59989400  | 4.69404900  | -1.00875400 |                        |             |              |             |

|   |             |             |             |
|---|-------------|-------------|-------------|
| N | -1.01461000 | -0.84134900 | 0.09521900  |
| N | -1.25977500 | -1.67363300 | 0.98281700  |
| N | -1.38041600 | -2.37059500 | 1.87199100  |
| C | -1.88980900 | -0.84529500 | -1.11530800 |
| H | -1.49441300 | -1.60278500 | -1.80256600 |
| H | -1.71990700 | 0.13855400  | -1.55348500 |
| C | -3.34641000 | -1.07173200 | -0.80843800 |
| C | -4.19431300 | 0.01373300  | -0.55492300 |
| C | -3.85586200 | -2.37389200 | -0.72858000 |
| C | -5.53225900 | -0.19943800 | -0.22523100 |
| H | -3.80234800 | 1.02552800  | -0.61483600 |
| C | -5.19399200 | -2.58823900 | -0.39619600 |
| H | -3.20419300 | -3.22079400 | -0.93212200 |
| C | -6.03292700 | -1.50112700 | -0.14352600 |
| H | -6.18338300 | 0.64878500  | -0.03382900 |
| H | -5.58078500 | -3.60162500 | -0.33854300 |
| H | -7.07537900 | -1.66751200 | 0.11307900  |

Int2

SCF Done: -1664.625835

|    |             |             |             |
|----|-------------|-------------|-------------|
| Si | -0.38978800 | 1.90407800  | 1.65939600  |
| Si | 0.20289900  | 2.32369700  | -1.34822100 |
| N  | 0.10089800  | 1.26370400  | 0.07490300  |
| C  | 1.83975500  | -0.91034600 | 0.74792200  |
| C  | 1.91062700  | -0.63999200 | -0.80727800 |
| C  | 0.12640800  | 0.73526300  | 3.04800400  |
| H  | -0.37132500 | -0.23921300 | 3.01580100  |
| H  | -0.14617900 | 1.20155300  | 4.00332200  |
| C  | 1.20551200  | 0.55781000  | 3.05742100  |
| H  | 0.45810700  | 3.56082300  | 1.98798300  |
| H  | 1.54716700  | 3.43898500  | 1.97420900  |
| H  | 0.17573600  | 3.93088800  | 2.98141100  |
| H  | 0.19892400  | 4.33817000  | 1.26185100  |
| C  | -1.27887400 | 3.50536100  | -1.37040600 |
| H  | -2.22982800 | 2.95960000  | -1.39835700 |
| H  | -1.22620900 | 4.11874000  | -2.27875100 |
| H  | -1.31221000 | 4.19041000  | -0.51691300 |
| C  | -2.26650800 | 2.11871800  | 1.77590300  |
| H  | -2.66345800 | 2.79426300  | 1.01127900  |
| H  | -2.53291100 | 2.53339800  | 2.75645400  |
| H  | -2.78268400 | 1.15713500  | 1.67469600  |
| C  | 0.59353000  | -0.11115800 | 0.00719500  |
| B  | 1.78740500  | 3.34832500  | -1.39023600 |
| H  | 1.97365100  | 3.86870600  | -0.44593700 |
| H  | 1.71503700  | 4.10384700  | -2.18325200 |
| H  | 2.65899500  | 2.72185000  | -1.60313300 |
| C  | 0.12521600  | 1.35211700  | -2.97308600 |
| H  | 0.76125300  | 0.46241700  | -2.97768900 |
| H  | 0.48313200  | 2.01144500  | -3.77386400 |
| H  | -0.89573000 | 1.05650000  | -3.24447900 |
| B  | 2.93895500  | 0.33764800  | 0.24941700  |
| H  | 2.63000700  | 1.45202100  | 0.46592900  |
| B  | 3.37058400  | -2.96185700 | -0.37782500 |
| H  | 3.50578400  | -4.12398900 | -0.59479500 |
| B  | 3.50887700  | -0.21676400 | -1.31886200 |
| H  | 3.67206200  | 0.56480700  | -2.19754200 |
| B  | 2.66311100  | -2.37533500 | 1.18428400  |
| H  | 2.25160300  | -3.05715600 | 2.06482700  |
| B  | 4.51009000  | -0.36920100 | 0.18124200  |
| H  | 5.46098900  | 0.32298000  | 0.36043700  |
| B  | 2.81300700  | -1.82355900 | -1.67160400 |
| H  | 2.50002300  | -2.11639500 | -2.77935200 |
| H  | 1.78647300  | -2.29216400 | -0.33428300 |
| B  | 0.76473300  | -2.85960400 | -0.51442900 |
| B  | 4.46297100  | -1.69648700 | -1.00105300 |
| H  | 5.41238400  | -1.97237800 | -1.66346600 |
| H  | 4.37166500  | -2.04522600 | 0.77190800  |
| B  | 5.25880500  | -2.56347200 | 1.37259600  |
| B  | 3.37104300  | -0.77407400 | 1.52850700  |
| H  | 3.43699700  | -0.37620700 | 2.64524200  |
| N  | -0.76035500 | -1.09747100 | -0.03137900 |
| N  | -0.97357600 | -1.87632500 | 0.92327200  |
| N  | -1.12827700 | -2.53273700 | 1.83141300  |
| C  | -1.65800700 | -1.25129800 | -1.22345600 |
| H  | -1.31985300 | -2.13833500 | -1.76968100 |
| H  | -1.42909200 | -0.36918800 | -1.81652700 |
| C  | -3.11212500 | -1.32206600 | -0.84855000 |
| C  | -3.82700700 | -0.14286600 | -0.60098500 |
| C  | -3.74747900 | -2.55950900 | -0.69496100 |
| C  | -5.16080100 | -0.20206500 | -0.20208300 |
| H  | -3.33103200 | 0.81689500  | -0.71466500 |
| C  | -5.08446700 | -2.61902600 | -0.29728600 |
| H  | -3.19807000 | -3.47723500 | -0.89326500 |
| C  | -5.79039300 | -1.44086400 | -0.04884200 |
| H  | -5.70860000 | 0.71629400  | -0.01154600 |
| H  | -5.57214200 | -3.58282300 | -0.18346300 |
| H  | -6.83053700 | -1.48632500 | 0.26123400  |

TS4

SCF Done: -1664.615522

|    |             |             |             |
|----|-------------|-------------|-------------|
| Si | -0.30174500 | 2.18870100  | 1.49798800  |
| Si | 1.15694200  | 2.50045700  | -1.24514800 |
| N  | 0.40899500  | 1.47085400  | 0.01749700  |
| C  | 1.45019600  | -1.51814900 | 0.96136800  |
| C  | 1.69658300  | -0.86374000 | -0.48139900 |
| C  | -0.41020200 | 0.90460400  | 2.87589500  |
| H  | -1.30749200 | 0.28032200  | 2.80470800  |
| H  | -0.46471700 | 1.43101400  | 3.83676700  |
| H  | 0.46108700  | 0.24277000  | 2.89923900  |
| C  | 0.82776800  | 3.57530900  | 2.10021200  |
| H  | 1.84185200  | 3.19748800  | 2.27172000  |
| H  | 0.44769100  | 3.95906200  | 3.05506000  |
| H  | 0.89506700  | 4.42162400  | 1.40982100  |
| C  | 0.03582500  | 3.99675500  | -1.54462600 |
| H  | -0.96224100 | 3.69051600  | -1.87977900 |
| H  | 0.47723100  | 4.60447400  | -2.34481600 |
| H  | -0.08669800 | 4.64788700  | -0.67330400 |
| C  | -2.03987100 | 2.85619600  | 1.17654400  |
| H  | -2.08955500 | 3.49922800  | 0.29236800  |
| H  | -2.38337900 | 3.44338000  | 2.03751400  |
| H  | -2.74897500 | 2.03188700  | 1.04351400  |
| B  | 0.47118100  | 0.05764900  | -0.10591600 |
| C  | 2.87452800  | 3.10906100  | -0.77315800 |
| H  | 2.83011400  | 3.85775600  | 0.02450700  |
| H  | 3.35806200  | 3.57335300  | -1.64180100 |
| H  | 3.51157500  | 2.28914100  | -0.43299400 |
| C  | 1.17600100  | 1.54004700  | -2.86945300 |
| H  | 1.81600900  | 0.65574700  | -2.85136400 |
| H  | 1.54206400  | 2.19689000  | -3.66838700 |
| H  | 0.16347600  | 1.22294200  | -3.15093000 |
| B  | 2.77340500  | -0.42682500 | 0.81350200  |
| H  | 2.66565200  | 0.64995100  | 1.29419600  |
| B  | 2.63254100  | -3.44836000 | -0.69721600 |
| H  | 2.54716400  | -4.51001200 | -1.22920400 |
| B  | 3.37345600  | -0.66015700 | -0.84263800 |
| H  | 3.73748600  | 0.27628200  | -1.47219200 |
| B  | 1.97494300  | -3.17045000 | 0.95483200  |
| H  | 1.38562200  | -3.97435200 | 1.60352000  |
| B  | 4.21415000  | -1.38176400 | 0.56696500  |
| H  | 5.26935800  | -0.96695200 | 0.92946700  |
| B  | 2.40488000  | -1.93360200 | -1.63089500 |
| H  | 2.10330900  | -1.84067700 | -2.77700100 |
| B  | 1.20206900  | -2.48532700 | -0.45787000 |
| H  | 0.09890100  | -2.75827400 | -0.80582000 |
| B  | 3.99878300  | -2.32061200 | -0.93768800 |
| H  | 4.92044900  | -2.58708100 | -1.64320100 |
| B  | 3.73506900  | -3.10024200 | 0.66305200  |
| H  | 4.47081600  | -3.92646000 | 1.10370500  |
| B  | 2.94007300  | -1.90287800 | 1.72928400  |
| H  | 3.01833800  | -1.84141200 | 2.91369900  |
| N  | -0.96394500 | -0.59932300 | -0.01964600 |
| N  | -1.18419400 | -1.50571100 | 0.84594100  |
| N  | -1.64273800 | -2.24966500 | 1.56035800  |
| C  | -1.89151200 | -0.58179200 | -1.21681600 |
| H  | -1.48640300 | -1.31035000 | -1.92703600 |
| H  | -1.74302600 | 0.42423400  | -1.61411800 |
| C  | -3.32813200 | -0.85766400 | -0.88111000 |
| C  | -4.21094500 | 0.19452000  | -0.60397500 |
| C  | -3.79253000 | -2.17919800 | -0.81918600 |
| H  | -5.53508700 | -0.07089800 | -0.25846700 |
| H  | -3.86143700 | 1.22084900  | -0.66935300 |
| C  | -5.11680500 | -2.44457400 | -0.46997000 |
| H  | -3.11714500 | -3.00002600 | -1.04954300 |
| C  | -5.98781000 | -1.39085300 | -0.18669900 |
| H  | -6.21354300 | 0.75103900  | -0.04913600 |
| H  | -5.46742200 | -3.47137400 | -0.42391100 |
| H  | -7.01966000 | -1.59706600 | 0.08306700  |

Int3

SCF Done: -1664.692454

|    |             |             |             |
|----|-------------|-------------|-------------|
| Si | -1.41670500 | 1.80421500  | 1.30680100  |
| Si | 0.40240200  | 2.99493400  | -0.90516700 |
| N  | -0.19835600 | 1.59944800  | 0.02169800  |
| C  | 1.78843100  | -1.79543700 | -0.39982400 |
| C  | 1.77243300  | -0.28113600 | 0.13373800  |
| C  | -1.33517000 | 0.34123200  | 2.48927900  |
| H  | -1.61283200 | -0.59871000 | 2.00392500  |
| H  | -2.04367600 | 0.50568600  | 3.31069500  |
| H  | -0.33783500 | 0.22716900  | 2.92742100  |
| C  | -1.03766900 | 3.36750200  | 2.29899400  |
| H  | -0.02537600 | 3.33994000  | 2.71700500  |
| C  | -1.74335700 | 3.43368900  | 3.13671400  |
| H  | -1.13849600 | 4.28927700  | 1.71650600  |
| C  | -1.05752000 | 4.07199900  | -1.43706600 |
| H  | -1.77306800 | 3.50047500  | -2.03950200 |
| H  | -0.68981000 | 4.90187200  | -2.05366200 |

|   |             |             |             |                        |             |             |             |
|---|-------------|-------------|-------------|------------------------|-------------|-------------|-------------|
| H | -1.60281700 | 4.50898800  | -0.59413000 | B                      | 3.57544200  | -0.40799400 | 2.91407600  |
| C | -3.16347000 | 1.93736900  | 0.60636600  | H                      | 4.55450500  | 0.23544000  | 2.74607600  |
| H | -3.25401400 | 2.74858400  | -0.12341300 | B                      | 0.68894800  | -2.20964700 | 3.01425800  |
| H | -3.87561400 | 2.13802100  | 1.41714800  | H                      | -0.37184400 | -2.71803000 | 2.88648200  |
| H | -3.47322500 | 1.00517200  | 0.12394100  | B                      | 2.44695800  | -0.29108600 | 4.30402800  |
| B | 0.31787000  | 0.29113300  | -0.26918600 | H                      | 2.66053700  | 0.43841100  | 5.21640800  |
| C | 1.62192900  | 4.04403400  | 0.08057400  | B                      | 3.48038400  | -2.05409200 | 2.25109300  |
| H | 1.13402800  | 4.58991000  | 0.89388700  | H                      | 4.39178100  | -2.48413800 | 1.63255400  |
| H | 2.10058800  | 4.78171900  | -0.57629900 | B                      | 1.83822500  | -2.34458800 | 1.65348500  |
| H | 2.41236800  | 3.42603700  | 0.51884000  | H                      | 1.54706900  | -2.84296300 | 0.62204900  |
| C | 1.25013300  | 2.37595900  | -2.47567500 | B                      | 3.36977300  | -1.79752800 | 4.00738400  |
| H | 2.25933100  | 1.99921000  | -2.28710400 | H                      | 4.25037800  | -2.13805900 | 4.72783400  |
| H | 1.34033100  | 3.20971600  | -3.18291100 | B                      | 1.64629200  | -1.89067700 | 4.48041100  |
| H | 0.67911900  | 1.58313400  | -2.97295700 | H                      | 1.28943800  | -2.29626100 | 5.53793700  |
| B | 1.58998200  | -1.57388600 | 1.28982400  | B                      | 0.78630700  | -0.55139400 | 3.69010600  |
| H | 0.51026900  | -1.75206400 | 1.72872500  | H                      | -0.21049600 | -0.00138600 | 4.00916900  |
| B | 4.37384800  | -0.95294000 | -0.56368900 | N                      | 1.05420100  | -0.01681700 | -0.16907800 |
| H | 5.33482100  | -0.72615300 | -1.22409300 | N                      | 0.18361200  | -0.38204700 | 0.93488800  |
| B | 2.62403200  | -0.17281900 | 1.61118300  | N                      | -1.01528000 | -0.41564000 | 0.97054400  |
| B | 2.25902700  | 0.62544900  | 2.40837000  | Si                     | -3.78228800 | 2.20275500  | -0.70734200 |
| B | 3.31044000  | -2.35025500 | -0.91493800 | Si                     | -3.73805600 | 0.90692500  | 2.13858900  |
| H | 3.35312000  | -3.09542300 | -1.83335300 | N                      | -3.34082000 | 0.86157400  | 0.39217300  |
| B | 3.19133300  | -1.84462200 | 1.93914200  | C                      | -2.80408900 | -1.09278800 | -1.53717400 |
| H | 3.31363600  | -2.25135700 | 3.04854800  | C                      | -3.08107000 | -1.91919900 | -0.19309000 |
| B | 3.34808000  | 0.36957200  | 0.07924200  | C                      | -2.78870900 | 2.17746800  | -2.30973000 |
| H | 3.47943000  | 1.52483400  | -0.14112700 | H                      | -1.72978900 | 2.40060200  | -2.15357000 |
| B | 2.77907100  | -0.67740700 | -1.23247100 | H                      | -3.19218600 | 2.96711700  | -2.95695200 |
| H | 2.40094700  | -0.32748500 | -2.29428200 | H                      | -2.87564000 | 1.23342700  | -2.85362600 |
| B | 4.29270500  | -0.64298800 | 1.19938300  | C                      | -5.60857600 | 2.11518100  | -1.17851900 |
| H | 5.21865500  | -0.19622700 | 1.79485600  | H                      | -5.80601500 | 1.26473500  | -1.83916100 |
| B | 4.26509800  | -2.32575300 | 0.58537900  | H                      | -5.89221600 | 3.02808200  | -1.71787100 |
| H | 5.16736400  | -3.08279000 | 0.74156200  | B                      | -6.26577900 | 2.03253300  | -0.30851000 |
| B | 2.58087400  | -2.89799900 | 0.62438300  | C                      | -2.47176500 | 1.98834400  | 3.03400400  |
| H | 2.14932600  | -3.99781900 | 0.70274000  | H                      | -1.46048300 | 1.59041500  | 2.89834600  |
| N | -0.34518300 | -0.76297700 | -0.93035100 | H                      | -2.67302200 | 2.00903800  | 4.11235100  |
| N | 0.51494400  | -2.06683500 | -1.12042400 | H                      | -2.48335000 | 3.02123300  | 2.67124200  |
| N | 0.19613600  | -3.02470100 | -1.72677500 | C                      | -3.44688900 | 3.86317200  | 0.13230800  |
| C | -1.61298800 | -0.84731000 | -1.61071200 | H                      | -4.02374200 | 4.01815200  | 1.04958300  |
| H | -1.44894700 | -1.41976200 | -2.53583700 | H                      | -3.71920500 | 4.66630700  | -0.56415900 |
| H | -1.89423900 | 0.17187800  | -1.89597700 | H                      | -2.38460800 | 3.98099800  | 0.36852200  |
| C | -2.73623600 | -1.50376300 | -0.82471200 | B                      | -2.77876100 | -0.33223300 | -0.11778800 |
| C | -4.06216600 | -1.23935300 | -1.18936100 | C                      | -5.46914900 | 1.61970400  | 2.39780800  |
| C | -2.49077100 | -2.39387200 | 0.22489300  | H                      | -5.59041000 | 2.63958800  | 2.01965800  |
| C | -5.12226600 | -1.84307600 | -0.51292500 | H                      | -5.69100900 | 1.63823000  | 3.47234800  |
| C | -4.26624200 | -0.54787100 | -2.00456100 | H                      | -6.22493400 | 0.98890400  | 1.91604400  |
| H | -3.55000800 | -2.99673700 | 0.90641100  | C                      | -3.72340400 | -0.83050500 | 2.86181800  |
| H | -1.47076100 | -2.61755500 | 0.51766300  | H                      | -4.44660600 | -1.48197700 | 2.35955900  |
| C | -4.86853200 | -2.72335100 | 0.54109800  | H                      | -3.99740500 | -0.77926600 | 3.92318000  |
| H | -6.14510100 | -1.62063900 | -0.80483400 | H                      | -2.73842200 | -1.29785400 | 2.78464600  |
| H | -3.34081300 | -3.68261500 | 1.72285600  | B                      | -4.46926300 | -1.53926500 | -1.17433700 |
| H | -5.69213000 | -3.19145300 | 1.07299700  | H                      | -5.19661700 | -0.70022200 | -0.77946300 |
|   |             |             |             | B                      | -2.01675800 | -3.70246500 | -2.04919100 |
|   |             |             |             | H                      | -1.14158400 | -4.45185500 | -2.34740100 |
|   |             |             |             | B                      | -4.31856700 | -3.10083800 | -0.38324800 |
|   |             |             |             | H                      | -5.03832700 | -3.35961400 | 0.52426100  |
|   |             |             |             | B                      | -2.12325600 | -2.05120200 | -2.78378000 |
|   |             |             |             | H                      | -1.34444800 | -1.56979000 | -3.54060800 |
|   |             |             |             | B                      | -4.80478200 | -2.94688600 | -2.12041500 |
|   |             |             |             | H                      | -5.92343600 | -3.15342600 | -2.46790800 |
|   |             |             |             | B                      | -2.59564800 | -3.56676100 | -0.33535500 |
|   |             |             |             | H                      | -2.14461900 | -4.13991900 | 0.60078100  |
|   |             |             |             | B                      | -1.65413100 | -2.30511200 | -1.11050400 |
|   |             |             |             | H                      | -0.60195800 | -1.96654000 | -0.71118800 |
|   |             |             |             | B                      | -3.66515700 | -4.22075600 | -1.61042300 |
|   |             |             |             | H                      | -3.97492700 | -5.36963100 | -1.62172400 |
|   |             |             |             | B                      | -3.37401300 | -3.27718600 | -3.12882300 |
|   |             |             |             | H                      | -3.47394700 | -3.75986400 | -4.21197500 |
|   |             |             |             | B                      | -3.84814200 | -1.58317300 | -2.82334000 |
|   |             |             |             | H                      | -4.23647700 | -0.78742700 | -3.61434600 |
|   |             |             |             | C                      | 0.43164400  | 0.73442700  | -1.25510400 |
|   |             |             |             | H                      | -0.62671000 | 4.07047900  | -1.28758200 |
|   |             |             |             | H                      | 0.87654300  | 0.38867500  | -2.18702700 |
|   |             |             |             | C                      | 0.63228600  | 2.22483800  | -1.07974600 |
|   |             |             |             | H                      | 1.25575700  | 2.97870000  | -2.97741700 |
|   |             |             |             | C                      | 0.21671700  | 2.86332800  | 0.09705900  |
|   |             |             |             | B                      | 1.47685500  | 4.34701100  | -1.90119300 |
|   |             |             |             | H                      | 1.57501700  | 2.49089700  | -2.95802100 |
|   |             |             |             | C                      | 0.44228900  | 4.22697700  | 0.27812100  |
|   |             |             |             | H                      | -0.29299300 | 2.29726600  | 0.87016700  |
|   |             |             |             | C                      | 1.07640600  | 4.97242000  | -0.72022800 |
|   |             |             |             | H                      | 1.96869900  | 4.91877900  | -2.68306900 |
|   |             |             |             | H                      | 0.11851600  | 4.70773300  | 1.19705700  |
|   |             |             |             | H                      | 1.25398500  | 6.03446800  | -0.57739600 |
|   |             |             |             | Int4                   |             |             |             |
|   |             |             |             | SCF Done: -2894.060093 |             |             |             |
|   |             |             |             | Si                     | 4.67354100  | 0.99919600  | -0.70382900 |
|   |             |             |             | Si                     | 3.63694500  | -1.76959100 | -1.78693200 |

|    |             |             |             |                        |             |             |             |
|----|-------------|-------------|-------------|------------------------|-------------|-------------|-------------|
| N  | 3.39141200  | -0.25345000 | -0.84388400 | H                      | -1.07805300 | -2.04989500 | -3.23147200 |
| C  | 0.84002900  | -0.54409900 | 2.08598200  | B                      | -4.71526000 | -2.97221500 | -1.89990400 |
| C  | 2.39066000  | -0.49478400 | 1.69567500  | H                      | -5.82961700 | -3.10281500 | -2.29060400 |
| C  | 4.01092300  | 2.46230400  | 0.28167100  | B                      | -2.66647100 | -3.64897300 | 0.04009900  |
| H  | 3.09917700  | 2.86881800  | -0.16553200 | H                      | -2.31689900 | -4.18279100 | 1.04156500  |
| H  | 4.76868200  | 3.25554800  | 0.25206200  | B                      | -1.57719700 | -2.54982600 | -0.77178100 |
| C  | 3.81547900  | 2.24665700  | 1.33269200  | H                      | -0.51546200 | -2.28547300 | -0.33065000 |
| H  | 6.19772400  | 0.26540500  | 0.12963800  | B                      | -3.73238900 | -4.30325700 | -1.23422900 |
| H  | 5.95313400  | -0.13048100 | 1.12169300  | H                      | -4.15510700 | -5.41456500 | -1.17314300 |
| H  | 6.97637600  | 1.02785500  | 0.25474300  | B                      | -3.27878100 | -3.51890600 | -2.80032400 |
| H  | 6.62858700  | -0.55303600 | -0.45911700 | H                      | -3.37774100 | -4.07365300 | -3.84919900 |
| C  | 4.81900500  | -1.48790400 | -3.22595500 | B                      | -3.59730600 | -1.76824600 | -2.64943000 |
| H  | 4.47645600  | -0.70792200 | -3.91272200 | H                      | -3.86914400 | -1.01345700 | -3.52469000 |
| H  | 4.87391800  | -2.42706600 | -3.79091000 | C                      | 0.41617100  | 0.49197200  | -1.45061300 |
| H  | 5.83664600  | -1.24304300 | -2.90509400 | H                      | -0.64916500 | 0.28204700  | -1.52648200 |
| C  | 5.12373000  | 1.68828400  | -2.40352400 | H                      | 0.89633100  | -0.00531800 | -2.29108200 |
| H  | 5.82558900  | 1.06630800  | -2.96346100 | C                      | 0.70613400  | 1.97680200  | -1.45796900 |
| H  | 5.59373100  | 2.66887700  | -2.25659400 | C                      | 1.44560800  | 2.54703900  | -2.49701200 |
| H  | 4.23220800  | 1.84340900  | -3.01930300 | C                      | 0.23991400  | 2.79662000  | -0.42109700 |
| B  | 2.34623700  | -0.25885900 | 0.10975700  | C                      | 1.72695400  | 3.91539800  | -2.49968300 |
| C  | 4.38227200  | -3.08467900 | -0.66007600 | H                      | 1.80522300  | 1.91603900  | -3.30554600 |
| H  | 5.28493600  | -2.72262400 | -0.15610800 | C                      | 0.52624100  | 4.16061600  | -0.41744700 |
| H  | 4.65581500  | -3.96933100 | -1.24866400 | H                      | -0.37061700 | 2.37534800  | 0.37205100  |
| H  | 3.67799600  | -3.40906200 | 0.11281900  | C                      | 1.27326700  | 4.72342800  | -1.45643400 |
| C  | 2.00990900  | -2.41923700 | -2.47433100 | H                      | 2.30689100  | 4.34504100  | -3.31151200 |
| H  | 1.21003300  | -2.48517300 | -1.73209200 | H                      | 0.15830700  | 4.78441200  | 0.39215600  |
| H  | 2.17842800  | -3.43559600 | -2.85175900 | H                      | 1.49655200  | 5.78638500  | -1.45266300 |
| H  | 1.63868300  | -1.82545500 | -3.31685300 |                        |             |             |             |
| B  | 1.72125600  | 0.81548900  | 2.63581400  | TS6                    |             |             |             |
| H  | 1.53170600  | 1.82981700  | 2.06099500  | SCF Done: -2894.058679 |             |             |             |
| B  | 2.03789300  | -2.42526100 | 3.66508800  | Si                     | 4.63887300  | 1.09267500  | -0.72460700 |
| B  | 2.14438100  | -3.55766600 | 4.00394400  | Si                     | 3.68914500  | -1.70410400 | -1.81330500 |
| H  | 3.30140100  | 0.09910400  | 3.01835900  | N                      | 3.40619700  | -0.20726900 | -0.85268300 |
| H  | 4.28065400  | 0.72680800  | 2.80646200  | C                      | 0.85208700  | -0.52982700 | 2.07832800  |
| B  | 0.44013700  | -1.72981300 | 3.24334200  | C                      | 2.40269800  | -0.49519100 | 1.68415300  |
| H  | -0.60209800 | -2.27816300 | 3.13460600  | C                      | 3.94193400  | 2.52338700  | 0.28634500  |
| B  | 2.08915200  | 0.41679300  | 4.29996400  | H                      | 2.97721600  | 2.86704500  | -0.09946300 |
| H  | 2.23589100  | 1.29122400  | 5.08926000  | H                      | 4.64248200  | 3.36365200  | 0.20034400  |
| C  | 3.26992400  | -1.63356500 | 2.62924600  | H                      | 3.83332200  | 2.30436400  | 1.34940700  |
| H  | 4.22065800  | -2.13646800 | 2.13715200  | C                      | 6.20415900  | 0.41617500  | 0.08032600  |
| B  | 1.67353800  | -2.06262700 | 1.99666700  | H                      | 5.99633600  | 0.03718200  | 1.08718400  |
| H  | 1.45401500  | -2.72992900 | 1.04735800  | H                      | 6.96713200  | 1.19958000  | 0.16717200  |
| B  | 3.04967700  | -1.09699000 | 4.31067500  | H                      | 6.63824900  | -0.40512400 | -0.50190200 |
| H  | 3.88933600  | -1.29360800 | 5.12673100  | C                      | 4.94203100  | -1.40169200 | -3.18727800 |
| H  | 1.30023200  | -1.15112200 | 4.68848200  | H                      | 4.61470300  | -0.64002600 | -3.90130100 |
| B  | 0.88234000  | -1.38591700 | 5.77457200  | H                      | 5.05123200  | -2.34509900 | -3.73720100 |
| B  | 0.47222400  | 0.02016800  | 3.64246600  | H                      | 5.93488900  | -1.12540200 | -2.81811700 |
| H  | -0.55013700 | 0.58476200  | 3.81062500  | H                      | 5.03404500  | 1.80127800  | -2.43177000 |
| N  | 0.93639200  | -0.14062900 | -0.23037000 | C                      | 5.78829000  | 1.23065800  | -2.97889000 |
| N  | 0.05471600  | -0.28442700 | 0.86124100  | H                      | 5.41887300  | 2.82011400  | -2.29988900 |
| N  | -1.16319100 | -0.33043100 | 0.91372300  | H                      | 4.13662200  | 1.86898500  | -3.05461400 |
| Si | -3.61387400 | 2.07336100  | -0.99716900 | B                      | 2.35840500  | -0.24662500 | 0.10042300  |
| Si | -3.65131300 | 1.21438900  | 1.96313600  | C                      | 4.37022700  | -3.04537100 | -0.67760900 |
| N  | -3.14246900 | 0.92269900  | 0.27830200  | H                      | 5.25821300  | -2.70154500 | -0.13567500 |
| C  | -2.57482400 | -1.27012100 | -1.34475600 | H                      | 4.65345000  | -3.92722700 | -1.26565300 |
| C  | -2.99500600 | -1.94445100 | 0.02429300  | H                      | 3.63261500  | -3.36835800 | 0.06422000  |
| C  | -2.60891500 | 1.90389600  | -2.58705200 | C                      | 2.09518400  | -2.32553200 | -2.59803500 |
| H  | -1.59656600 | 2.30463900  | -2.49780400 | H                      | 1.26914600  | -2.43125000 | -1.88989000 |
| H  | -3.12524900 | 2.50074100  | -3.35021900 | H                      | 2.28305500  | -3.32121000 | -3.01902200 |
| H  | -2.55695300 | 0.87989500  | -2.96411400 | H                      | 1.75445900  | -1.68992700 | -3.42323200 |
| C  | -5.42864900 | 1.90992600  | -1.51164500 | B                      | 1.74679500  | 0.82847600  | 2.61664400  |
| H  | -5.56823000 | 1.07800100  | -2.20917100 | H                      | 1.55919300  | 1.83847800  | 2.03384200  |
| H  | -5.73866300 | 2.83054700  | -2.02352500 | B                      | 2.03944300  | -2.40522300 | 3.67113200  |
| H  | -6.10438600 | 1.75299100  | -0.66664700 | H                      | 2.13838600  | -3.53526200 | 4.02010300  |
| C  | -2.50475900 | 2.49143500  | 2.77018600  | B                      | 3.32172500  | 0.10298200  | 2.99907400  |
| H  | -1.45129700 | 2.24970500  | 2.59174400  | H                      | 4.30535100  | 0.72067500  | 2.77697700  |
| H  | -2.65422600 | 2.52271400  | 3.85677500  | B                      | 0.44598400  | -1.70118500 | 3.24715400  |
| H  | -2.68534600 | 3.49885900  | 2.38048800  | H                      | -0.60134000 | -2.24104200 | 3.14651600  |
| C  | -3.35417200 | 3.84789300  | -0.38502400 | B                      | 2.11672300  | 0.44089700  | 4.28191900  |
| H  | -4.01207700 | 4.12414100  | 0.44492200  | H                      | 2.27223300  | 1.32105900  | 5.06331600  |
| H  | -3.56958700 | 4.53445600  | -1.21365600 | B                      | 3.27512000  | -1.63312600 | 2.62500500  |
| H  | -2.31988200 | 4.02281200  | -0.07373300 | H                      | 4.22067800  | -2.14913400 | 2.13645900  |
| B  | -2.43054800 | -0.34204400 | 0.00563400  | H                      | 1.67393900  | -2.05532700 | 2.00014600  |
| C  | -5.42218400 | 1.87559700  | 2.05144400  | B                      | 1.44523100  | -2.72863200 | 1.05767200  |
| H  | -5.58208400 | 2.81406400  | 1.51176300  | B                      | 3.06437000  | -1.08021000 | 4.30267300  |
| H  | -5.67372600 | 2.05612300  | 3.10456700  | H                      | 3.90444800  | -1.27712500 | 5.11832600  |
| H  | -6.13400700 | 1.13719200  | 1.66537400  | B                      | 1.31480200  | -1.11655100 | 4.68551400  |
| C  | -3.64503600 | -0.39036000 | 2.95318600  | H                      | 0.89822200  | -1.33868000 | 5.77485100  |
| H  | -4.29706800 | -1.13741700 | 2.48797600  | B                      | 0.49506700  | 0.05207900  | 3.63188100  |
| H  | -4.03181600 | -0.18617200 | 3.95971200  | H                      | -0.52076700 | 0.63046300  | 3.79809600  |
| H  | -2.65121100 | -0.83304800 | 3.05369400  | N                      | 0.95095200  | -0.13151800 | -0.23781000 |
| B  | -4.28231600 | -1.53110500 | -1.04400400 | N                      | 0.07246600  | -0.26601100 | 0.86048600  |
| H  | -4.95309500 | -0.61023100 | -0.75287400 | N                      | -1.15507400 | -0.25516200 | 0.92713500  |
| B  | -2.02273400 | -3.98139300 | -1.61969000 | Si                     | -3.75853300 | 1.93330900  | -1.09112300 |
| H  | -1.21059000 | -4.83081400 | -1.81097700 | Si                     | -3.64391700 | 1.25576300  | 1.93788000  |
| H  | -4.32719800 | -3.02708200 | -0.13515200 | N                      | -3.17165300 | 0.90673500  | 0.24766500  |
| B  | -5.10987400 | -3.14206200 | 0.75022000  | C                      | -2.56439200 | -1.32343300 | -1.19165100 |
| B  | -1.93354600 | -2.39290700 | -2.48067900 | C                      | -2.76922800 | -2.14595900 | 0.15451500  |

|   |             |             |             |    |             |             |             |
|---|-------------|-------------|-------------|----|-------------|-------------|-------------|
| C | -2.69803200 | 1.76281900  | -2.64584200 | C  | 2.26083800  | -1.47804200 | -3.22376800 |
| H | -1.73231200 | 2.26381700  | -2.53369700 | H  | 1.26130800  | -1.61418100 | -2.80410500 |
| H | -3.23187700 | 2.26659400  | -3.46190900 | H  | 2.45066400  | -2.33035400 | -3.88844700 |
| H | -2.53016200 | 0.73212300  | -2.96550300 | H  | 2.25760700  | -0.57419500 | -3.84514100 |
| C | -5.54726900 | 1.55699100  | -1.55833300 | B  | 1.46506800  | 0.62616200  | 2.63326000  |
| H | -5.63763800 | 0.56750000  | -2.01597900 | H  | 1.40260400  | 1.69607700  | 2.13916300  |
| H | -5.89645800 | 2.29909000  | -2.28793000 | B  | 1.46608900  | -2.66620000 | 3.46121600  |
| H | -6.22007600 | 1.59179400  | -0.69653800 | H  | 1.45136800  | -3.82379400 | 3.72738300  |
| C | -2.52052400 | 2.60274900  | 2.65123700  | B  | 2.95623400  | -0.22722500 | 3.05606700  |
| H | -1.46565800 | 2.31238500  | 2.59507700  | H  | 3.98770900  | 0.34000400  | 2.94502100  |
| H | -2.75225200 | 2.79047000  | 3.70705100  | B  | -0.03525800 | -1.80624200 | 2.98645500  |
| H | -2.63805300 | 3.54769800  | 2.10949700  | H  | -1.10432100 | -2.28273000 | 2.82079100  |
| C | -3.62268800 | 3.75490800  | -0.59171100 | B  | 1.70707300  | 0.10535600  | 4.28892000  |
| H | -4.22015300 | 4.02777200  | 0.28295600  | H  | 1.87512600  | 0.91852700  | 5.13910500  |
| H | -3.96935800 | 4.37231900  | -1.43019900 | B  | 2.82380800  | -1.92590400 | 2.55963600  |
| H | -2.58047900 | 4.02739300  | -0.39400300 | H  | 3.75926300  | -2.48326300 | 2.09318200  |
| B | -2.35112300 | -0.25993000 | -0.01320700 | B  | 1.24846100  | -2.15558900 | 1.80571100  |
| C | -5.43814600 | 1.85050700  | 2.01657800  | H  | 1.05665100  | -2.76356400 | 0.81831700  |
| H | -5.64653600 | 2.76038800  | 1.44625700  | B  | 2.53879400  | -1.47682600 | 4.25543700  |
| H | -5.68911900 | 2.05592900  | 3.06513600  | B  | 3.30642500  | -1.79227000 | 5.10596100  |
| H | -6.11847600 | 1.06688200  | 1.66430500  | B  | 0.76883600  | -1.40085400 | 4.52399200  |
| C | -3.57419900 | -0.30737600 | 2.98595500  | H  | 0.26034500  | -1.67320300 | 5.56324200  |
| H | -4.16401000 | -1.10654500 | 2.52472500  | B  | 0.11531000  | -0.10092400 | 3.51413300  |
| H | -4.00564800 | -0.09379100 | 3.97218400  | H  | -0.85229400 | 0.56602800  | 3.68513800  |
| H | -2.56057800 | -0.68702300 | 3.12898900  | N  | 0.84668500  | 0.03689000  | -0.30116900 |
| B | -4.19245100 | -1.76897100 | -0.72465800 | N  | -0.17455500 | -0.11908300 | 0.72243700  |
| H | -4.90809400 | -0.93724400 | -0.29217800 | N  | -1.30585000 | -0.79851400 | 0.31522000  |
| B | -1.80554200 | -3.91967000 | -1.77523900 | Si | -3.92366500 | 1.83150800  | -1.37616900 |
| H | -0.94212800 | -4.65975400 | -2.12899300 | Si | -3.62308600 | 1.51304800  | 1.71695200  |
| B | -4.00846500 | -3.34131100 | 0.01400600  | C  | -3.22515300 | 0.98094400  | 0.04376200  |
| H | -4.67955900 | -3.61211800 | 0.95570200  | C  | -2.90554600 | -1.64515900 | -0.94640900 |
| B | -1.95313500 | -2.27110400 | -2.48444300 | C  | -1.48680000 | -2.14612000 | -0.32484300 |
| H | -1.21733300 | -1.77231800 | -3.27486800 | C  | -2.91479100 | 1.47778300  | -2.92946100 |
| B | -4.59335200 | -3.16468600 | -1.68280500 | H  | -1.91064200 | 1.91127400  | -2.87084100 |
| H | -5.72886600 | -3.36403900 | -1.97790700 | H  | -3.42364900 | 1.96024200  | -3.77395500 |
| B | -2.29709600 | -3.80502100 | -0.03953300 | H  | -2.82655300 | 0.41642100  | -3.17393200 |
| H | -1.79051400 | -4.39111600 | 0.86105900  | C  | -5.69479400 | 1.26272500  | -1.67515000 |
| B | -1.40893200 | -2.52816300 | -0.82638400 | H  | -5.72733000 | 0.17309400  | -1.79764900 |
| H | -0.33686600 | -2.20175500 | -0.46585500 | H  | -6.09210300 | 1.71148100  | -2.59394200 |
| B | -3.42878400 | -4.45156200 | -1.26333500 | H  | -6.36692900 | 1.52780100  | -0.85365900 |
| H | -3.74000100 | -5.60085100 | -1.26971600 | C  | -2.48542700 | 2.88873800  | 2.32067200  |
| B | -3.22038800 | -3.48788100 | -2.77661200 | H  | -1.46847600 | 2.52878500  | 2.50441200  |
| H | -3.38571000 | -3.95429000 | -3.85975500 | H  | -2.86922300 | 3.28521800  | 3.26903600  |
| B | -3.67649700 | -1.80253700 | -2.42029900 | H  | -2.43567100 | 3.71761200  | 1.60677300  |
| C | -4.10815900 | -1.00371900 | -3.18410500 | C  | -3.78187400 | 3.69052500  | -1.08636100 |
| H | 0.42801500  | 0.50754600  | -1.45252800 | C  | -4.34049900 | 4.06436500  | -0.22405400 |
| H | -0.61352100 | 0.22035900  | -1.58589100 | H  | -4.15074800 | 4.22011400  | -1.97355400 |
| H | 0.97890300  | 0.07289200  | -2.28406600 | H  | -2.72810700 | 3.96311300  | -0.95333400 |
| C | 0.61048100  | 2.00964600  | -1.41427500 | B  | -2.56980100 | -0.24157700 | -0.16732900 |
| C | 1.34488200  | 2.64860200  | -2.41694600 | C  | -5.41015400 | 2.12912500  | 1.77288400  |
| C | 0.06435000  | 2.77617900  | -0.37508200 | C  | -5.62625300 | 2.99851600  | 1.14591700  |
| C | 1.54880500  | 4.02983100  | -2.37869200 | H  | -5.63300800 | 2.41129500  | 2.81000100  |
| H | 1.76378500  | 2.06032700  | -3.22905000 | H  | -6.10538700 | 1.32857700  | 1.49695500  |
| C | 0.27636200  | 4.15325200  | -0.32912000 | C  | -3.57957600 | 0.04252600  | 2.88853000  |
| H | -0.55069200 | 2.30711700  | 0.38540800  | H  | -4.42197600 | -0.62904800 | 2.68858800  |
| C | 1.02264400  | 4.78363400  | -1.32912900 | H  | -3.68325600 | 0.40905600  | 3.91733900  |
| H | 2.12629000  | 4.51149000  | -3.16257600 | H  | -2.66154300 | -0.54284000 | 2.84181400  |
| H | -0.14980500 | 4.73334800  | 0.48453700  | B  | -2.95836400 | -2.75067900 | 0.40069500  |
| H | 1.18741600  | 5.85657000  | -1.29130000 | H  | -3.24435900 | -2.30363600 | 1.45195000  |

3  
SCF Done: -2894.132709

|    |            |             |             |   |             |             |             |
|----|------------|-------------|-------------|---|-------------|-------------|-------------|
| Si | 4.58681800 | 1.13174800  | -0.35947000 | H | -0.93188900 | -4.14508900 | 1.11497100  |
| Si | 3.61486900 | -1.41274200 | -1.90829500 | B | -3.23762000 | -2.39698700 | -2.44776400 |
| N  | 3.34436400 | -0.09280900 | -0.73767300 | H | -3.81137600 | -1.77971000 | -3.28238000 |
| C  | 0.48660900 | -0.59719600 | 1.91965600  | B | -3.20891700 | -4.32345500 | -0.28986800 |
| C  | 2.09483000 | -0.66365700 | 1.64624600  | H | -3.77488100 | -5.15919700 | 0.33700300  |
| C  | 3.87448400 | 2.49513700  | 0.73422700  | B | -0.69695100 | -3.27233800 | -1.32484600 |
| H  | 2.92015200 | 2.87859000  | 0.36407300  | H | 0.48304500  | -3.29927300 | -1.38546000 |
| H  | 4.58656700 | 3.33035200  | 0.72337300  | B | -1.58661400 | -1.92273000 | -2.04091200 |
| H  | 3.74547100 | 2.19535400  | 1.77580600  | H | -1.04519900 | -0.98129600 | -2.49141900 |
| C  | 6.05269400 | 0.33939900  | 0.52881100  | B | -1.81340400 | -4.66585900 | -1.35322400 |
| H  | 5.72523700 | -0.15737900 | 1.44858400  | H | -1.39222200 | -5.76832600 | -1.49473500 |
| H  | 6.79470000 | 1.09944900  | 0.80474300  | B | -3.37804200 | -4.12954200 | -2.05508800 |
| H  | 6.55918400 | -0.40930400 | -0.09015200 | H | -4.07272300 | -4.85197300 | -2.69354800 |
| C  | 5.24238100 | -1.21579600 | -2.84617800 | B | -4.06977400 | -2.89503900 | -0.96074600 |
| H  | 5.21727000 | -0.38442000 | -3.55679600 | H | -5.20944700 | -2.61342400 | -0.78868900 |
| H  | 5.38848000 | -2.13712000 | -3.42452600 | C | 0.45042900  | 0.91173600  | -1.40787600 |
| C  | 6.11972800 | -1.09359200 | -2.20421600 | H | -0.60696800 | 0.73897200  | -1.60142700 |
| H  | 5.17717900 | 1.97224100  | -1.95196000 | H | 0.99000700  | 0.57495500  | -2.29107600 |
| H  | 6.00841300 | 1.44625600  | -2.42928500 | C | 0.69165000  | 2.38558400  | -1.17860400 |
| H  | 5.51989300 | 2.98621600  | -1.71223900 | C | 1.52349900  | 3.11138700  | -2.03618400 |
| H  | 4.36721300 | 2.06534300  | -2.68338500 | C | 0.06991400  | 3.04544600  | -0.11186000 |
| B  | 2.18854400 | -0.22059500 | 0.10680300  | C | 1.74777500  | 4.47346900  | -1.82159200 |
| C  | 3.67640900 | -3.06222400 | -0.99750600 | H | 2.00671600  | 2.60589100  | -2.86840500 |
| H  | 4.47843500 | -3.06674400 | -0.25060800 | C | 0.29675000  | 4.40290200  | 0.10964900  |
| H  | 3.86829000 | -3.87812400 | -1.70542700 | H | -0.58221700 | 2.48083900  | 0.54075800  |
| H  | 2.74173700 | -3.29296400 | -0.47821800 | C | 1.13926500  | 5.12054800  | -0.74505500 |

|   |             |            |             |   |            |            |            |
|---|-------------|------------|-------------|---|------------|------------|------------|
| H | 2.40408100  | 5.02424400 | -2.48976300 | H | 3.60375900 | 2.01138600 | 0.94770300 |
| H | -0.18313400 | 4.89823100 | 0.94953100  | H | 3.00174300 | 3.53182000 | 1.63727400 |
| H | 1.31901200  | 6.17801500 | -0.57218000 | H | 2.15747700 | 2.00838700 | 1.95651400 |

TMSN3

SCF Done: -573.611528

|    |             |             |             |
|----|-------------|-------------|-------------|
| Si | -0.66336300 | 0.00017200  | 0.02017100  |
| C  | -0.72155100 | -1.54686600 | 1.09237300  |
| H  | -0.67358700 | -2.45485700 | 0.48088100  |
| H  | -1.64859700 | -1.58277700 | 1.67801400  |
| H  | 0.11710200  | -1.57247600 | 1.79856100  |
| C  | -0.71809700 | 1.54917700  | 1.08970800  |
| H  | 0.12003100  | 1.57357800  | 1.79656300  |
| H  | -1.64552800 | 1.58870500  | 1.67449400  |
| H  | -0.66703200 | 2.45600700  | 0.47674400  |
| C  | -1.99793800 | 0.00013400  | -1.29635100 |
| H  | -1.91755500 | 0.88609100  | -1.93584300 |
| H  | -2.99607100 | -0.00057000 | -0.84230300 |
| H  | -1.91654200 | -0.88546600 | -1.93622600 |
| N  | 0.86428100  | -0.00229600 | -0.90269900 |
| N  | 1.97173500  | -0.00111300 | -0.37825500 |
| N  | 3.04118100  | -0.00020700 | 0.02557300  |

Int1-TMS

SCF Done: -1802.94608

|    |             |             |             |
|----|-------------|-------------|-------------|
| B  | 2.49652500  | -0.51512300 | -0.30319300 |
| H  | 2.72155100  | 0.58491600  | -0.63470400 |
| B  | 1.43034300  | -3.57489800 | 0.58476100  |
| H  | 1.02581400  | -4.64905400 | 0.89839000  |
| B  | 2.41130200  | -1.79632000 | -1.48630300 |
| H  | 2.64920900  | -1.55666400 | -2.62444900 |
| B  | 1.44703200  | -2.20226800 | 1.76174200  |
| H  | 1.04395000  | -2.23656500 | 2.87829300  |
| B  | 3.60986000  | -1.82072400 | -0.13115500 |
| H  | 4.76860800  | -1.63735700 | -0.32902600 |
| B  | 1.07027200  | -2.87709500 | -1.04155500 |
| H  | 0.39836400  | -3.37896700 | -1.88264900 |
| B  | 0.32522100  | -2.26055300 | 0.41898400  |
| H  | -0.83467700 | -2.25713600 | 0.58138900  |
| B  | 2.74071600  | -3.30817400 | -0.59416200 |
| H  | 3.30202200  | -4.21804300 | -1.11716200 |
| B  | 2.97617800  | -2.88504100 | 1.14843400  |
| H  | 3.70161900  | -3.49634800 | 1.86711600  |
| B  | 2.78970000  | -1.11739000 | 1.31976500  |
| H  | 3.29411700  | -0.41982100 | 2.13545100  |
| C  | 0.97681200  | -1.16732700 | -0.75590100 |
| C  | 1.16807000  | -0.80621700 | 0.78170000  |
| B  | 0.15673900  | 0.12897500  | -0.12286600 |
| N  | -1.44171200 | 0.15600900  | -0.06877200 |
| Si | -2.13844000 | 0.27909300  | 1.68611000  |
| Si | -2.38184800 | -0.73923200 | -1.46537700 |
| C  | -2.15569300 | -2.60951200 | 2.60951200  |
| H  | -2.70048600 | -1.16674400 | 3.54523800  |
| H  | -2.68552400 | -2.14876600 | 2.07663700  |
| H  | -1.15911000 | -1.71661300 | 2.86459000  |
| C  | -3.90748400 | 0.90840000  | 1.59007300  |
| H  | -4.18624500 | 1.27546800  | 2.58626300  |
| H  | -4.02535300 | 1.72789900  | 0.87813900  |
| H  | -4.61157300 | 0.11130100  | 1.33050900  |
| C  | -1.02442000 | 1.50894400  | 2.56576300  |
| H  | -0.00100500 | 1.13095000  | 2.64550300  |
| H  | -1.00106300 | 2.47893200  | 2.06048300  |
| H  | -1.40648200 | 1.66703700  | 3.58168600  |
| C  | -4.06254900 | 0.07241800  | -1.70989600 |
| H  | -4.49449500 | -0.36790300 | -2.61867300 |
| H  | -4.75913600 | -0.12979300 | -0.89174200 |
| H  | -3.99504800 | 1.15261300  | -1.85003100 |
| C  | -1.32387300 | -0.50000700 | -2.96609000 |
| H  | -0.93540200 | 0.52173600  | -3.05994000 |
| H  | -0.47678400 | -1.18886200 | -3.02354700 |
| H  | -1.94257100 | -0.67719400 | -3.88492000 |
| C  | -2.73033600 | -2.54981500 | -1.09946600 |
| H  | -3.47461400 | -2.87236600 | -1.84014700 |
| H  | -1.85812200 | -3.19781400 | -1.19115300 |
| H  | -3.17393100 | -2.70220900 | -0.11018000 |
| N  | 0.42580500  | 1.61585500  | -0.40909800 |
| N  | -0.71950600 | 2.24684000  | -0.68161200 |
| N  | -1.78060300 | 1.61394000  | -0.55206500 |
| Si | 1.77228700  | 2.85643100  | -0.27964700 |
| C  | 2.72473600  | 2.95118000  | -1.90039300 |
| H  | 2.03305500  | 3.15992300  | -2.72527900 |
| H  | 3.44470500  | 3.77829800  | -1.85599100 |
| C  | 3.27379900  | 2.03705100  | -2.14110100 |
| C  | 0.91494600  | 4.51064600  | 0.00483500  |
| H  | 0.28670100  | 4.48758800  | 0.90277500  |
| H  | 1.67790600  | 5.28590600  | 0.15160400  |
| H  | 0.28259400  | 4.80449700  | -0.83723100 |
| C  | 2.83440800  | 2.51958700  | 1.23810800  |
| H  | 3.64144000  | 1.80456800  | 1.06963800  |
| H  | 3.27831100  | 3.46930000  | 1.56214000  |
| H  | 2.22484100  | 2.14354000  | 2.06721400  |

TS1-TMS

SCF Done: -1802.938318

|    |             |             |             |
|----|-------------|-------------|-------------|
| B  | 2.50360200  | -0.44213100 | -0.44294300 |
| H  | 2.64431600  | 0.63906300  | -0.88283600 |
| B  | 1.69316500  | -3.46675000 | 0.79084400  |
| H  | 1.38257000  | -4.52917200 | 1.22756300  |
| B  | 2.41489300  | -1.83415200 | -1.49772400 |
| H  | 2.55934200  | -1.69585000 | -2.66799600 |
| B  | 1.69439100  | -1.98845200 | 1.83554000  |
| H  | 1.36395600  | -1.93483200 | 2.97520700  |
| B  | 3.70183900  | -1.66440900 | -0.23513500 |
| H  | 4.83157200  | -1.43558800 | -0.53094800 |
| B  | 1.17262900  | -2.94180100 | -0.85752200 |
| H  | 0.48946300  | -3.55851700 | -1.60663300 |
| B  | 0.48774400  | -2.25060600 | 0.60373600  |
| H  | -0.65240500 | -2.29956400 | 0.87943000  |
| B  | 2.89679400  | -3.23501900 | -0.50082900 |
| H  | 3.47866100  | -4.15592500 | -0.98033700 |
| B  | 3.22198900  | -2.63932700 | 1.17549400  |
| H  | 4.03263300  | -3.13310300 | 1.89369000  |
| B  | 2.93421900  | -0.88111500 | 1.20169000  |
| B  | 3.45298300  | -0.09957900 | 1.92420400  |
| C  | 0.99982700  | -1.22211800 | -0.72745100 |
| C  | 1.26345100  | -0.70948200 | 0.74394000  |
| B  | 0.08689900  | 0.03145700  | -0.15387000 |
| N  | -1.41553400 | -0.06290000 | -0.03166400 |
| Si | -2.12824400 | 0.38563600  | 1.58115900  |
| Si | -2.39071900 | -1.03621400 | -1.23271000 |
| C  | -3.03433900 | -1.09155300 | 2.32498000  |
| H  | -3.39755500 | -0.81264600 | 3.32218700  |
| H  | -3.90224100 | -1.40618200 | 1.73628300  |
| H  | -2.36969900 | -1.95353000 | 2.44101300  |
| C  | -3.32163100 | 1.83785700  | 1.41700900  |
| H  | -3.79530800 | 2.01677200  | 2.39079400  |
| H  | -2.79835700 | 2.75603900  | 1.12876800  |
| H  | -4.11349900 | 1.66302100  | 0.68427400  |
| C  | -0.75447600 | 0.91641300  | 2.75418000  |
| H  | -0.07620800 | 0.09615700  | 3.00259100  |
| H  | -0.15787300 | 1.73575600  | 2.34010700  |
| H  | -1.21175000 | 1.27658300  | 3.68430100  |
| C  | -4.14431200 | -0.33595300 | -1.29981700 |
| H  | -4.70207800 | -0.89990200 | -2.05824200 |
| H  | -4.68360900 | -0.45663500 | -0.35395400 |
| H  | -4.17140900 | 0.72035000  | -1.57957500 |
| C  | -1.58475200 | -0.90436700 | -2.92909400 |
| H  | -1.57599400 | 0.12224200  | -3.30856700 |
| H  | -0.55730200 | -1.27887900 | -2.92286900 |
| H  | -2.15817300 | -1.51631000 | -3.63658800 |
| C  | -2.58495100 | -2.86136700 | -0.79813400 |
| H  | -3.35492900 | -3.26732400 | -1.46820200 |
| H  | -1.67119200 | -3.43772200 | -0.95338200 |
| H  | -2.92222000 | -3.02723700 | 0.22878200  |
| N  | 0.40317800  | 1.58292800  | -0.57817600 |
| N  | -0.66544500 | 2.08667600  | -1.12178100 |
| N  | -1.77856600 | 1.75854600  | -1.21366900 |
| Si | 1.64038800  | 2.93516200  | -0.30314400 |
| C  | 2.59825700  | 3.21490300  | -1.89367100 |
| H  | 1.91236800  | 3.38397700  | -2.73194500 |
| H  | 3.22644600  | 4.10909400  | -1.79384900 |
| H  | 3.24640900  | 2.37194100  | -2.14890600 |
| C  | 0.57164400  | 4.44423700  | 0.06951200  |
| H  | -0.07804200 | 4.26845500  | 0.93559300  |
| H  | 1.21816000  | 5.29696000  | 0.31112800  |
| H  | -0.06130200 | 4.73733500  | -0.77465600 |
| C  | 2.70179700  | 2.57372300  | 1.19495200  |

2-TMS

SCF Done: -1803.051555

|   |             |             |             |
|---|-------------|-------------|-------------|
| B | -1.79229300 | 1.13441100  | -0.60895300 |
| H | -1.46550900 | 2.11433500  | -0.04086700 |
| B | -2.49001700 | -1.89192200 | -1.91805000 |
| H | -2.70150100 | -2.98266100 | -2.34185300 |
| B | -3.35503600 | 0.34661000  | -0.33180800 |
| H | -4.10691400 | 0.85320900  | -0.43127700 |
| B | -0.94715500 | -1.07215800 | -2.21992700 |
| H | -0.00938300 | -1.51868900 | -2.78487000 |
| B | -2.95440300 | 0.97193400  | -1.94292600 |
| H | -3.49800800 | 1.93314800  | -2.38389300 |
| B | -3.07305800 | -1.39860900 | -0.31729800 |
| H | -3.62979800 | -2.10456800 | 0.45483300  |
| B | -1.34024600 | -1.65772500 | -0.58419300 |

|    |             |             |             |                        |             |             |             |
|----|-------------|-------------|-------------|------------------------|-------------|-------------|-------------|
| H  | -0.72226700 | -2.47495700 | -0.00092400 | B                      | -4.00528500 | 1.07688000  | -0.07363200 |
| B  | -3.74946500 | -0.62505800 | -1.76688200 | H                      | -4.69438900 | 2.04660900  | -0.08195200 |
| H  | -4.88194700 | -0.81170500 | -2.07807000 | B                      | -2.74627400 | -1.09359700 | -1.53566900 |
| B  | -2.43440000 | -0.42240000 | -2.94296700 | H                      | -2.47483400 | -1.63325900 | -2.55829100 |
| H  | -2.60075100 | -0.45985100 | -4.11982800 | B                      | -3.13917200 | 0.55340700  | 1.42980000  |
| B  | -1.23065000 | 0.67579600  | -2.23583800 | H                      | -3.14385800 | 1.12287600  | 2.47035000  |
| C  | -0.47919900 | 1.38694800  | -2.80876500 | B                      | -3.72133600 | -1.79312800 | -0.18321300 |
| H  | -1.89803300 | -0.30809900 | 0.30380400  | H                      | -4.20007800 | -2.87871800 | -0.26931100 |
| C  | -0.63562300 | -0.11267100 | -0.84403300 | B                      | -2.92966200 | 0.68261100  | -1.47526900 |
| B  | 0.87419400  | 0.13740100  | -0.42254100 | H                      | -2.78020700 | 1.33995700  | -2.45278500 |
| N  | 1.90141800  | -0.83984300 | -0.18915100 | B                      | -2.29768000 | 1.25763100  | 0.05862200  |
| Si | 2.26295600  | -2.62976100 | -0.16961700 | H                      | -1.69345900 | 2.26525900  | 0.13468400  |
| Si | -1.60895200 | -0.24211100 | 2.22644400  | B                      | -4.31268300 | -0.37052300 | -1.07152000 |
| C  | 1.67607800  | -3.32808600 | 1.47962500  | H                      | -5.25936300 | -0.43465500 | -1.78963900 |
| H  | 1.91855400  | -4.39656200 | 1.53755200  | B                      | -4.44702400 | -0.44816500 | 0.73118200  |
| H  | 2.18678500  | -2.82765600 | 2.31057200  | H                      | -5.48872900 | -0.57121400 | 1.29309700  |
| H  | 0.59770800  | -3.22386100 | 1.63150700  | B                      | -2.96741100 | -1.22099200 | 1.36018400  |
| C  | 4.13003100  | -2.79629400 | -0.29605300 | H                      | -2.85162500 | -1.85314100 | 2.35799300  |
| H  | 4.39408500  | -3.85949300 | -0.36108100 | Si                     | 1.32231500  | 2.83881400  | -0.59905900 |
| H  | 4.51056900  | -2.29669700 | -1.19348000 | C                      | 1.45407300  | 4.43746000  | 0.37934500  |
| H  | 4.64065600  | -2.35994200 | 0.56596300  | H                      | 0.47362700  | 4.78793400  | 0.72154900  |
| C  | 1.51549900  | -3.54327200 | -1.63258300 | H                      | 1.87919500  | 5.22179200  | -0.25866100 |
| H  | 0.42825600  | -3.63019800 | -1.61675600 | H                      | 2.10560600  | 4.33692800  | 1.25505000  |
| H  | 1.80635800  | -3.07713800 | -2.57981900 | C                      | 3.01205000  | 2.17361900  | -1.05571100 |
| H  | 1.93457200  | -4.55830600 | -1.62445000 | H                      | 3.60642000  | 1.95940900  | -0.16138600 |
| C  | 0.19409500  | 0.04812300  | 2.67956000  | H                      | 3.55326700  | 2.91506700  | -1.65655400 |
| H  | 0.25332200  | 0.07546500  | 3.77549600  | H                      | 2.94208700  | 1.25444800  | -1.64112900 |
| H  | 0.85278100  | -0.75112300 | 2.33298900  | C                      | 0.14907300  | 2.98241800  | -2.05035600 |
| H  | 0.58424000  | 0.99591700  | 2.30315500  | H                      | -0.22530800 | 2.00431100  | -2.36330300 |
| C  | -2.66031200 | 1.16672500  | 2.90123300  | H                      | 0.65320800  | 3.44551400  | -2.90729400 |
| H  | -2.46645000 | 2.10668200  | 2.37352100  | H                      | -0.71894200 | 3.59613700  | -1.79002600 |
| H  | -3.72999700 | 0.95178400  | 2.81796200  | N                      | 0.56303500  | 1.62430200  | 0.55440700  |
| H  | -2.42687000 | 1.32234400  | 3.96156800  | N                      | 0.26378600  | 2.01282700  | 1.69167900  |
| C  | -2.16621100 | -1.89455300 | 2.93631500  | N                      | -0.04953700 | 2.29462700  | 2.74644600  |
| H  | -1.91475500 | -1.93750000 | 4.00310200  |                        |             |             |             |
| H  | -3.24632000 | -2.03831500 | 2.83736900  | Int2-TMS               |             |             |             |
| H  | -1.66987400 | -2.73582800 | 2.44072500  | SCF Done: -1802.962109 |             |             |             |
| N  | 1.53276600  | 1.39494400  | -0.19749600 | Si                     | 1.79724100  | -1.38213800 | 1.55346300  |
| N  | 2.83838700  | 1.10204100  | 0.19574700  | Si                     | 1.54238100  | -1.53893600 | -1.51393700 |
| N  | 3.04322700  | -0.14026000 | 0.20048200  | N                      | 0.99688700  | -0.88926600 | 0.04638900  |
| Si | 1.29732300  | 3.20652400  | -0.19185000 | C                      | -1.65812300 | -0.22877700 | 0.85985000  |
| C  | 3.01196700  | 3.96816300  | -0.28847400 | C                      | -1.54760600 | -0.10033800 | -0.71276800 |
| H  | 3.54748300  | 3.62640900  | -1.18068300 | C                      | 0.62797700  | -1.25522500 | 3.02834800  |
| H  | 2.91778100  | 5.06009200  | -0.34570400 | H                      | 0.33805700  | -0.23672000 | 3.29899700  |
| C  | 3.62334100  | 3.71415400  | 0.58098800  | H                      | 1.13040700  | -1.69135200 | 3.90119400  |
| H  | 0.48909700  | 3.69258400  | 1.44012100  | H                      | -0.29124400 | -1.82267500 | 2.85265700  |
| H  | -0.50125400 | 3.25030200  | 1.57995200  | C                      | 2.33755900  | -3.19330800 | 1.49726800  |
| H  | 1.11952800  | 3.39033300  | 2.28436500  | H                      | 1.46141100  | -3.84915500 | 1.43833700  |
| H  | 0.37620700  | 4.78298900  | 1.48600400  | H                      | 2.86440200  | -3.43174000 | 2.42984300  |
| C  | 0.32202500  | 3.81762900  | -1.67837800 | H                      | 3.00422900  | -3.44911200 | 0.66920700  |
| H  | 0.76393100  | 3.45996400  | -2.61438300 | C                      | 3.43869900  | -1.53496300 | -1.59456700 |
| H  | -0.73589400 | 3.55124300  | -1.67936800 | H                      | 3.86318400  | -0.53479400 | -1.45618100 |
| H  | 0.39235000  | 4.91354900  | -1.68076900 | H                      | 3.74761000  | -1.88898600 | -2.58631300 |
|    |             |             |             | H                      | 3.90761500  | -2.19375000 | -0.85707900 |
|    |             |             |             | C                      | 3.30228700  | -0.27500000 | 1.86607500  |
|    |             |             |             | H                      | 4.01870200  | -0.32687100 | 1.03885800  |
|    |             |             |             | H                      | 3.82530300  | -0.56775900 | 2.78472300  |
|    |             |             |             | H                      | 3.00010400  | 0.77383700  | 1.97989900  |
|    |             |             |             | B                      | -0.16639100 | -0.01693100 | 0.15131200  |
|    |             |             |             | C                      | 0.94898900  | -3.30399300 | -1.82613200 |
|    |             |             |             | C                      | 1.14932900  | -3.97277300 | -0.98361200 |
|    |             |             |             | H                      | 1.46122100  | -3.71141800 | -2.70732000 |
|    |             |             |             | H                      | -0.12732700 | -3.32804700 | -2.02399700 |
|    |             |             |             | C                      | 0.93338000  | -0.50561000 | -2.97453500 |
|    |             |             |             | H                      | -0.15754700 | -0.44401100 | -3.01404100 |
|    |             |             |             | H                      | 1.26592500  | -1.00521800 | -3.89348900 |
|    |             |             |             | H                      | 1.33855900  | 0.51058500  | -2.99842800 |
|    |             |             |             | B                      | -1.86375200 | -1.70410000 | -0.03545200 |
|    |             |             |             | B                      | -0.99061300 | -2.49066700 | 0.00328200  |
|    |             |             |             | H                      | -4.06698300 | 0.86514100  | -0.05158700 |
|    |             |             |             | H                      | -4.82836600 | 1.77972100  | -0.05217800 |
|    |             |             |             | B                      | -2.62758600 | -1.18018000 | -1.52906600 |
|    |             |             |             | H                      | -2.30920900 | -1.68052500 | -2.55837100 |
|    |             |             |             | B                      | -3.17294200 | 0.38695900  | 1.45073400  |
|    |             |             |             | H                      | -3.22968700 | 0.93861500  | 2.50025600  |
|    |             |             |             | B                      | -3.56033900 | -1.97173200 | -0.19782100 |
|    |             |             |             | H                      | -3.95784600 | -3.08800300 | -0.30499800 |
|    |             |             |             | B                      | -2.95056900 | 0.57551900  | -1.44668400 |
|    |             |             |             | H                      | -2.84442700 | 1.25557400  | -2.41478900 |
|    |             |             |             | B                      | -2.38033900 | 1.17256700  | 0.09843000  |
|    |             |             |             | H                      | -1.85954300 | 2.22700600  | 0.19841900  |
|    |             |             |             | B                      | -4.25094200 | -0.58643700 | -1.07201700 |
|    |             |             |             | H                      | -5.18253500 | -0.71414200 | -1.80178800 |
|    |             |             |             | C                      | -4.39526100 | -0.69974900 | 0.72734000  |
|    |             |             |             | H                      | -5.42815600 | -0.91303500 | 1.27882100  |
|    |             |             |             | B                      | -2.86292500 | -1.36552500 | 1.35750300  |
|    |             |             |             | H                      | -2.70943200 | -2.00000200 | 2.34915900  |
|    |             |             |             | Si                     | 1.13176400  | 2.85190800  | -0.60304800 |

  

|                       |             |             |             |  |  |  |  |
|-----------------------|-------------|-------------|-------------|--|--|--|--|
| TS3-TMS               |             |             |             |  |  |  |  |
| SCF Done: -1802.96029 |             |             |             |  |  |  |  |
| Si                    | 1.70592500  | -1.47086800 | 1.58210400  |  |  |  |  |
| Si                    | 1.47734100  | -1.65589500 | -1.51099700 |  |  |  |  |
| N                     | 0.92947700  | -0.98889100 | 0.04974400  |  |  |  |  |
| C                     | -1.68658100 | -0.17990100 | 0.84069500  |  |  |  |  |
| C                     | -1.57918600 | -0.09021700 | -0.74917000 |  |  |  |  |
| C                     | 0.52874700  | -1.25203200 | 3.03660000  |  |  |  |  |
| H                     | 0.25526100  | -0.21543700 | 3.24846800  |  |  |  |  |
| H                     | 1.01554200  | -1.65183700 | 3.93528400  |  |  |  |  |
| H                     | -0.39912700 | -1.81197200 | 2.88191800  |  |  |  |  |
| C                     | 2.16518400  | -3.30401900 | 1.55637000  |  |  |  |  |
| H                     | 1.26303700  | -3.92296000 | 1.49102600  |  |  |  |  |
| H                     | 2.66894500  | -3.55531800 | 2.49823600  |  |  |  |  |
| H                     | 2.83235900  | -3.59497500 | 0.74011800  |  |  |  |  |
| C                     | 3.37070500  | -1.71878700 | -1.56296400 |  |  |  |  |
| H                     | 3.82587400  | -0.73339200 | -1.41851200 |  |  |  |  |
| H                     | 3.68023600  | -2.08286500 | -2.55080800 |  |  |  |  |
| H                     | 3.80496700  | -2.39471600 | -0.81974200 |  |  |  |  |
| C                     | 3.25302300  | -0.41959600 | 1.85931200  |  |  |  |  |
| H                     | 3.97035300  | -0.53252700 | 1.03955400  |  |  |  |  |
| H                     | 3.75767000  | -0.70302700 | 2.79098900  |  |  |  |  |
| H                     | 2.99197200  | 0.64280800  | 1.93147600  |  |  |  |  |
| B                     | -0.22178300 | -0.14629700 | 0.11793900  |  |  |  |  |
| C                     | 0.81285900  | -3.39789400 | -1.79896500 |  |  |  |  |
| H                     | 1.00905700  | -4.06608600 | -0.95477800 |  |  |  |  |
| H                     | 1.28885700  | -3.83149300 | -2.68779200 |  |  |  |  |
| H                     | -0.26817300 | -3.38473100 | -1.97156400 |  |  |  |  |
| C                     | 0.91253900  | -0.59593000 | -2.96756400 |  |  |  |  |
| H                     | -0.17621200 | -0.51126200 | -3.02350000 |  |  |  |  |
| H                     | 1.25198100  | -1.08568900 | -3.88923800 |  |  |  |  |
| H                     | 1.33593300  | 0.41293100  | -2.96395600 |  |  |  |  |
| B                     | -2.00792200 | -1.65422200 | -0.04003500 |  |  |  |  |
| H                     | -1.19038200 | -2.50021900 | -0.00167800 |  |  |  |  |

|   |             |            |             |    |             |             |             |
|---|-------------|------------|-------------|----|-------------|-------------|-------------|
| C | 1.13507500  | 4.41808100 | 0.43271300  | Si | 1.64813400  | -1.94505600 | -1.24648700 |
| H | 0.12731800  | 4.69559200 | 0.76176200  | N  | 1.28470200  | -0.76023900 | 0.03781600  |
| H | 1.51997900  | 5.24568500 | -0.17550800 | C  | -2.34918500 | 0.70694100  | 0.21175000  |
| H | 1.77747400  | 4.33693000 | 1.31692400  | C  | -1.42605600 | -0.58603800 | -0.00265300 |
| C | 2.86993400  | 2.30346000 | -1.02062000 | C  | 1.38863000  | 0.24875900  | 2.83886000  |
| H | 3.44726700  | 2.09876500 | -0.11327500 | H  | 0.95194800  | 1.20175900  | 2.57156800  |
| H | 3.38026500  | 3.09828000 | -1.57905700 | H  | 2.10321600  | 0.45845100  | 3.68983900  |
| H | 2.87715200  | 1.40151600 | -1.63487000 | H  | 0.58948000  | -0.36830100 | 3.30681400  |
| C | -0.03269300 | 2.95423500 | -2.06051400 | C  | 2.67064300  | -2.39787400 | 2.12744900  |
| H | -0.34855100 | 1.96451100 | -2.39809900 | H  | 1.74326700  | -2.95685100 | 2.29612500  |
| H | 0.45693700  | 3.46180300 | -2.90052900 | H  | 3.19874900  | -2.32921900 | 3.08689100  |
| H | -0.93520600 | 3.51399000 | -1.79705000 | H  | 3.29994900  | -2.98509300 | 1.45074100  |
| N | 0.41079900  | 1.56303100 | 0.53092200  | C  | 3.51526200  | -2.01976800 | -1.53070600 |
| N | 0.14261500  | 1.94088200 | 1.68893700  | H  | 3.91297000  | -1.04468900 | -1.83290700 |
| N | -0.12242700 | 2.23644400 | 2.74876600  | H  | 3.71667600  | -2.72565500 | -2.34639900 |

**TS4-TMS**

SCF Done: -1802.954018

|    |             |             |             |    |             |             |             |
|----|-------------|-------------|-------------|----|-------------|-------------|-------------|
| Si | 2.08976200  | -0.90894700 | 1.58110000  | H  | 4.55566700  | 0.14325900  | 2.11967400  |
| Si | 1.42926900  | -1.93199900 | -1.28663400 | H  | 3.79664900  | 1.31527000  | 1.03771800  |
| N  | 1.12261900  | -0.78238200 | 0.06416000  | B  | 0.07922200  | 0.01680900  | -0.03688100 |
| C  | -1.98405100 | 0.14000500  | 1.18406700  | C  | 1.03620600  | -3.67761400 | -0.82133600 |
| C  | -1.50144100 | -0.21857800 | -0.32841700 | H  | 1.58973500  | -4.09595900 | 0.02581800  |
| C  | 1.17901800  | -0.09649200 | 3.01973000  | H  | 1.17878700  | -4.34957400 | -1.67720000 |
| H  | 1.43547000  | 0.96274600  | 3.13447400  | H  | -0.02593800 | -3.68676900 | -0.56214200 |
| H  | 1.47863800  | -0.59770400 | 3.94787900  | C  | 0.88377000  | -1.33477900 | -2.86084100 |
| H  | 0.09040300  | -0.18012500 | 2.92792100  | H  | -0.19231900 | -1.15621400 | -2.80122500 |
| C  | 2.29049400  | -2.73702600 | 2.00286400  | H  | 1.04520400  | -2.08329500 | -3.64633800 |
| H  | 1.31277000  | -3.22800500 | 2.05790200  | H  | 1.36404600  | -0.40531600 | -3.18548700 |
| H  | 2.76217500  | -2.81904200 | 2.98999700  | B  | -2.11623500 | -0.31416600 | 1.57106400  |
| H  | 2.91125500  | -3.29540600 | 1.29575700  | H  | -1.39292700 | 0.08423300  | 2.41266100  |
| C  | 3.30172000  | -2.08721900 | -1.52394100 | B  | -3.86800900 | -1.00623800 | -1.25940500 |
| H  | 3.77353100  | -1.12747500 | -1.76333800 | H  | -4.46143600 | -1.24429400 | -2.26071500 |
| H  | 3.47904600  | -2.75800800 | -2.37450100 | B  | -2.08876700 | -1.92136100 | 0.83763800  |
| H  | 3.82400000  | -2.51437100 | -0.66241000 | H  | -1.34191700 | -2.72736800 | 1.28257400  |
| C  | 3.78651300  | -0.09492400 | 1.42033300  | B  | -3.87157000 | 0.63162500  | -0.53971000 |
| H  | 4.33374500  | -0.40669600 | 0.52626200  | H  | -4.33077000 | 1.62941200  | -0.98169800 |
| H  | 4.39604700  | -0.35670300 | 2.29463100  | B  | -3.57249900 | -1.28429500 | 1.62001400  |
| H  | 3.69780900  | 0.99664800  | 1.40212000  | B  | -3.96006000 | -1.71155300 | 2.65859000  |
| B  | 0.00158500  | 0.07723400  | 0.04597200  | B  | -2.27702200 | -1.75404800 | -0.92215300 |
| C  | 0.73792300  | -3.65829700 | -0.99102500 | H  | -1.67677500 | -2.46002300 | -1.65677200 |
| H  | 1.37930600  | -4.23125400 | -0.31364900 | B  | -2.41237600 | -0.03236600 | -1.32574800 |
| H  | 0.69238000  | -4.19932200 | -1.94451300 | H  | -1.85232800 | 0.51684500  | -2.21017600 |
| H  | -0.26952300 | -3.63787300 | -0.57114800 | B  | -3.68006900 | -2.18515500 | 0.07912600  |
| C  | 0.77840800  | -1.15818800 | -2.87934200 | H  | -4.15812200 | -3.27139400 | 0.02141500  |
| H  | -0.28397800 | -0.90700700 | -2.84807800 | B  | -4.66503100 | -0.70894000 | 0.31977200  |
| H  | 0.92231500  | -1.86367300 | -3.70692400 | H  | -5.84685200 | -0.73746300 | 0.43959700  |
| H  | 1.34586100  | -0.25219400 | -3.12535600 | B  | -3.68658400 | 0.46066100  | 1.23220700  |
| B  | -1.89129200 | -1.51817600 | 0.73655800  | H  | -4.02128600 | 1.34980400  | 1.93777200  |
| H  | -1.00870600 | -2.17358300 | 1.18172500  | Si | 1.05523200  | 2.78416200  | -0.56050600 |
| H  | -4.10762700 | 0.64945300  | -0.59255400 | C  | 1.68836300  | 3.68766100  | 0.96172000  |
| B  | -4.85970500 | 1.44730800  | -1.05793400 | H  | 0.84153900  | 4.05737500  | 1.54995900  |
| B  | -2.32747600 | -1.58270100 | -0.98978300 | H  | 2.30144600  | 4.55056400  | 0.67355100  |
| H  | -1.75443000 | -2.32256900 | -1.71751000 | H  | 2.29659700  | 3.04428400  | 1.60656500  |
| B  | -3.62266400 | 0.70771100  | 1.13571900  | C  | 2.43920400  | 2.01607800  | -1.58111800 |
| H  | -3.96664400 | 1.54347500  | 1.90923800  | H  | 2.89142300  | 1.14205300  | -1.11356100 |
| B  | -3.50102500 | -2.04270500 | 0.27298700  | H  | 3.22467000  | 2.76388700  | -1.74883200 |
| H  | -3.82415900 | -3.17945900 | 0.42013600  | C  | 2.05421600  | 1.71599500  | -2.56209000 |
| B  | -2.69738700 | 0.07364700  | -1.53029300 | C  | 0.09594000  | 3.93696700  | -1.69970900 |
| H  | -2.35993700 | 0.44842300  | -2.60765700 | H  | -0.49722400 | 3.36584100  | -2.42398200 |
| B  | -2.49492000 | 1.14065200  | -0.12446900 | H  | 0.80765900  | 4.54905200  | -2.26839400 |
| H  | -2.04088000 | 2.23047900  | -0.24855300 | H  | -0.57799600 | 4.60378200  | -1.15779900 |
| B  | -4.01389700 | -1.05413000 | -1.12704700 | N  | -0.03520100 | 1.43624400  | -0.05249800 |
| H  | -4.72190200 | -1.49179700 | -1.97950800 | N  | -1.47891100 | 1.91973500  | 0.26508800  |
| B  | -4.59815400 | -0.65569400 | 0.52320400  | N  | -1.80966700 | 3.02044700  | 0.53928900  |
| H  | -5.73174700 | -0.80853600 | 0.85586800  |    |             |             |             |
| B  | -3.24626300 | -0.93232200 | 1.66388300  |    |             |             |             |
| H  | -3.33644400 | -1.24183500 | 2.80835000  |    |             |             |             |

**TS5-TMS**

SCF Done: -3032.367874

|    |             |            |             |    |             |             |             |
|----|-------------|------------|-------------|----|-------------|-------------|-------------|
| Si | 1.13601000  | 2.72350100 | -0.90468400 | Si | -5.28798200 | 0.66274900  | 0.98755700  |
| C  | 1.13132400  | 4.41103000 | -0.08969100 | Si | -4.38607000 | -2.04555900 | -0.31641900 |
| H  | 0.11741100  | 4.76235100 | 0.13071500  | N  | -4.02410000 | -0.43343200 | 0.36698200  |
| H  | 1.58650100  | 5.13582700 | -0.77576500 | C  | -0.76805900 | 1.15802800  | -1.10877400 |
| C  | 1.71398300  | 4.42703900 | 0.83824700  | C  | -2.37282800 | 1.12497400  | -1.12339300 |
| H  | 2.85368800  | 2.07115800 | -1.24814500 | C  | -4.43703800 | 2.17481100  | 1.73782900  |
| H  | 3.55293300  | 2.30336400 | -0.44016200 | H  | -3.68547100 | 1.88498600  | 2.48236400  |
| H  | 3.23318700  | 2.52824000 | -2.17041200 | H  | -5.19058800 | 2.77940700  | 2.25741500  |
| H  | 2.84149500  | 0.98726600 | -1.38398900 | H  | -3.95246600 | 2.82273900  | 1.00498900  |
| C  | 0.01730900  | 2.61447800 | -2.39586200 | C  | -6.47413900 | 1.15522000  | -0.39270700 |
| H  | -0.15453600 | 1.57902000 | -2.70289300 | H  | -5.94122200 | 1.59156500  | -1.24368800 |
| H  | 0.47946300  | 3.14287600 | -3.23925200 | H  | -7.20809400 | 1.88942900  | -0.03823800 |
| H  | -0.96012100 | 3.06318200 | -2.19855500 | H  | -7.03107800 | 0.28411700  | -0.75921900 |
| N  | 0.38013200  | 1.58763900 | 0.39111000  | C  | -5.80941400 | -2.86892200 | 0.60767100  |
| N  | -0.17571200 | 2.15740500 | 1.37683600  | H  | -5.65612900 | -2.89525800 | 1.69116500  |
| N  | -0.51381200 | 2.78706400 | 2.24784100  | H  | -5.88129400 | -3.90540800 | 0.25458600  |
|    |             |            |             | H  | -6.77570900 | -2.39288000 | 0.41079000  |
|    |             |            |             | C  | -6.27541700 | -0.12851100 | 2.39111800  |
|    |             |            |             | H  | -7.04976700 | -0.81549100 | 2.04076300  |
|    |             |            |             | H  | -6.77617100 | 0.67270900  | 2.94943100  |

**Int3-TMS**

SCF Done: -1803.016852

|    |            |             |            |
|----|------------|-------------|------------|
| Si | 2.30017500 | -0.65377900 | 1.50055600 |
|----|------------|-------------|------------|



|    |             |             |             |                        |             |             |             |
|----|-------------|-------------|-------------|------------------------|-------------|-------------|-------------|
| H  | -5.63412400 | -0.67059900 | 3.09298600  | C                      | -0.13643200 | -2.50731500 | 2.21658000  |
| B  | -2.73572100 | 0.11949000  | 0.08129000  | H                      | -0.76269400 | -3.29288500 | 1.78435600  |
| C  | -4.86746300 | -1.92437400 | -2.13591000 | H                      | 0.75370500  | -2.40307800 | 1.59466200  |
| H  | -5.64838600 | -1.17551600 | -2.30657900 | H                      | 0.18294900  | -2.84642800 | 3.20987300  |
| H  | -5.24837600 | -2.89389400 | -2.48160500 | C                      | -0.19552200 | 0.48854100  | 3.27812600  |
| H  | -4.01206800 | -1.66166500 | -2.76629600 | H                      | 0.68117600  | 0.84743100  | 2.73368400  |
| C  | -2.87758500 | -3.16695400 | -0.17545600 | H                      | -0.87951500 | 1.33365900  | 3.42262600  |
| H  | -1.94953500 | -2.70929500 | -0.53187600 | H                      | 0.13945400  | 0.15850800  | 4.26852000  |
| H  | -3.05065000 | -4.06767200 | -0.77705900 |                        |             |             |             |
| H  | -2.71958000 | -3.48966100 | 0.85843400  |                        |             |             |             |
| B  | -1.57794700 | 2.57373200  | -0.57994300 | Int4-TMS               |             |             |             |
| H  | -1.57968500 | 2.78012600  | 0.58365800  | SCF Done: -3032.377219 |             |             |             |
| B  | -1.47558200 | 1.30839800  | -3.74319400 | Si                     | -5.17144800 | 0.65509400  | 0.99425200  |
| H  | -1.43887600 | 0.84853200  | -4.83687300 | Si                     | -4.27775900 | -1.98462100 | -0.46845000 |
| B  | -2.98758300 | 2.62903200  | -1.65638300 | N                      | -3.90908400 | -0.42103000 | 0.32681900  |
| H  | -4.01862800 | 3.01278300  | -1.22255400 | C                      | -0.61475200 | 1.18565500  | -1.03511100 |
| B  | -0.06043300 | 1.22098100  | -2.64775600 | C                      | -2.22774200 | 1.20602000  | -1.03834900 |
| H  | 0.95871900  | 0.65627700  | -2.81624700 | C                      | -4.30327000 | 2.07790400  | 1.88724600  |
| B  | -1.53804100 | 3.62555000  | -1.97999300 | H                      | -3.62874400 | 1.70333200  | 2.66674200  |
| H  | -1.54496800 | 4.80319200  | -1.82623500 | H                      | -5.06187100 | 2.69344900  | 2.38609800  |
| B  | -2.95306100 | 1.21780700  | -2.73134000 | H                      | -3.72998300 | 2.73965400  | 1.23557500  |
| H  | -3.96470000 | 0.66573900  | -2.99386800 | C                      | -6.31259400 | 1.27853200  | -0.37054700 |
| B  | -1.52340000 | 0.23957400  | -2.35718000 | H                      | -5.75488100 | 1.73894900  | -1.19198600 |
| H  | -1.49376600 | -0.93683100 | -2.24382100 | H                      | -7.01605600 | 2.02308400  | 0.02201900  |
| B  | -2.38390100 | 2.79502800  | -3.32268000 | H                      | -6.90519600 | 0.45583800  | -0.78913000 |
| H  | -3.00295000 | 3.39949000  | -4.13629800 | C                      | -5.69052800 | -2.87119200 | 0.41070800  |
| B  | -0.59724200 | 2.79904500  | -3.26747000 | H                      | -5.53575300 | -2.95007300 | 1.49138500  |
| H  | 0.07400100  | 3.40375800  | -4.03819600 | H                      | -5.74896900 | -3.88948200 | 0.00604100  |
| B  | -0.10265400 | 2.64899700  | -1.57088900 | H                      | -6.66297100 | -2.39848400 | 0.23821700  |
| H  | 0.88492100  | 3.01306300  | -1.04913800 | C                      | -6.21230400 | -0.21529700 | 2.30778400  |
| N  | -1.50129100 | -0.18965000 | 0.74536500  | H                      | -6.97578200 | 0.87481300  | 1.88833200  |
| N  | -0.31331000 | 0.28955800  | 0.02483100  | H                      | -6.72947600 | 0.55521700  | 2.89388000  |
| N  | 0.80093400  | -0.07264400 | 0.28569900  | H                      | -5.60029700 | -0.80207200 | 2.99961800  |
| Si | 3.94070000  | 0.32341500  | 2.43723400  | B                      | -2.61963900 | 0.13470100  | 0.08318100  |
| Si | 3.64789500  | 2.47907000  | 0.22302600  | C                      | -4.77472100 | -1.72581000 | -2.26836900 |
| N  | 3.33280700  | 0.82920300  | 0.82840900  | H                      | -5.55411700 | -0.96396600 | -2.37576900 |
| C  | 3.17235600  | -1.72402000 | -0.24109800 | H                      | -5.16299000 | -2.66584600 | -2.68059700 |
| C  | 3.06655700  | -0.77638000 | -1.52577400 | H                      | -3.92428000 | -1.42138700 | -2.88640700 |
| C  | 3.09013300  | -1.23532300 | 3.06395800  | C                      | -2.76812000 | -3.11073700 | -0.41637800 |
| H  | 2.01256500  | -1.11117600 | 3.17722500  | H                      | -1.83604100 | -2.63474300 | -0.73592800 |
| H  | 3.50548200  | -1.47092200 | 4.05230700  | H                      | -2.94328900 | -3.96272800 | -1.08466200 |
| H  | 3.26871000  | -2.09652900 | 2.41498200  | H                      | -2.61299400 | -3.51328500 | 0.58926600  |
| C  | 5.78951000  | -0.05199700 | 2.38641900  | B                      | -1.38995700 | 2.58603900  | -0.39085400 |
| H  | 5.98859200  | -0.93375100 | 1.76839200  | H                      | -1.37312300 | 2.69732800  | 0.78531000  |
| H  | 6.14348500  | -0.27180900 | 3.40197700  | B                      | -1.36452900 | 1.57231500  | -3.64355600 |
| H  | 6.38880200  | 0.77490100  | 1.99501400  | H                      | -1.35185600 | 1.19869100  | -4.76966100 |
| C  | 2.42383900  | 3.67737300  | 1.03245300  | B                      | -2.81227500 | 2.76068200  | -1.43927400 |
| H  | 1.42358800  | 3.24190700  | 1.12616400  | H                      | -3.82567100 | 3.12793800  | -0.95396200 |
| H  | 2.33084100  | 4.60334000  | 0.45209900  | H                      | 0.06496500  | 1.36634900  | -2.58686000 |
| H  | 2.76069700  | 3.94781600  | 2.03904600  | B                      | 1.06600600  | 0.81029600  | -2.83946700 |
| C  | 3.60941500  | 1.69928400  | 3.69416700  | B                      | -1.34417500 | 3.74222200  | -1.70170500 |
| H  | 4.18396100  | 2.61103900  | 3.50237000  | H                      | -1.31605300 | 4.90252800  | -1.45174900 |
| H  | 3.89182300  | 1.34014700  | 4.69181000  | B                      | -2.82723800 | 1.43771200  | -2.62096900 |
| B  | 2.54895000  | 1.97211500  | 3.72834100  | H                      | -3.85477700 | 0.92882800  | -2.90778500 |
| H  | 2.82458200  | -0.17189700 | -0.03827700 | B                      | -1.41617600 | 0.39496700  | -2.34692200 |
| C  | 5.39690000  | 3.04026900  | 0.66987400  | H                      | -1.42001700 | -0.78606500 | -2.32676000 |
| H  | 5.59342900  | 3.07795900  | 1.74576800  | B                      | -2.22871700 | 3.04265400  | -3.09382700 |
| H  | 5.55229700  | 4.05213200  | 0.27359200  | H                      | -2.84299700 | 3.72396800  | -3.84772800 |
| H  | 6.14701700  | 2.38774500  | 0.20939200  | B                      | -0.44470200 | 2.99991100  | -3.06524800 |
| C  | 3.57378100  | 2.49350100  | -1.65867100 | H                      | 0.23623700  | 3.64485700  | -3.79285200 |
| H  | 4.42741100  | 1.93859200  | -2.06373200 | B                      | 0.07047800  | 2.70182300  | -1.39513400 |
| H  | 3.64238700  | 3.52691800  | -2.02046000 | H                      | 1.06934500  | 3.01180500  | -0.86910000 |
| H  | 2.67082200  | 2.05010100  | -2.07850600 | N                      | -1.38375100 | -0.23780400 | 0.73271600  |
| B  | 4.67651100  | -1.20875600 | -1.00599600 | N                      | -0.21622000 | 0.23572300  | 0.05960700  |
| H  | 5.31972000  | -0.37514100 | -0.47510000 | N                      | 0.87685400  | -0.20395700 | 0.37046400  |
| B  | 2.43952600  | -3.36864800 | -2.34513300 | Si                     | 3.79113600  | 0.14662300  | 2.40533800  |
| H  | 1.64127000  | -4.11648600 | -2.81330100 | Si                     | 3.54597300  | 2.40973400  | 0.37631100  |
| B  | 4.27197400  | -1.14408300 | -2.71201800 | N                      | 3.09739200  | 0.76441700  | 0.87781000  |
| H  | 4.72837100  | -0.27917200 | -3.38391500 | C                      | -2.95772300 | -1.70091300 | -0.35025100 |
| B  | 2.78761200  | -3.35895000 | -0.57124700 | C                      | 2.78512300  | -0.71053500 | -1.56966700 |
| H  | 2.24723800  | -4.01863000 | 0.25501100  | C                      | 2.98765300  | -1.45196800 | 3.00060500  |
| B  | 5.18321400  | -2.53301200 | -1.99180800 | H                      | 1.93503900  | -1.33914400 | 3.25975800  |
| H  | 6.34469100  | -2.68237300 | -2.20082500 | H                      | 3.51946700  | -1.75943300 | 3.91039900  |
| B  | 2.57894500  | -1.66154900 | -2.93095300 | C                      | 3.08142900  | -2.26284300 | 2.27438100  |
| H  | 1.89601300  | -1.16025900 | -3.75928700 | H                      | 5.63410700  | -0.25919300 | 2.29008200  |
| B  | 1.90281400  | -2.05800100 | -1.35845700 | H                      | 5.80719000  | -1.08850800 | 1.59776800  |
| H  | 0.79530600  | -1.78780700 | -1.04979600 | H                      | 5.97744900  | -0.57962400 | 3.28276200  |
| B  | 3.90635500  | -2.82215100 | -3.19948200 | H                      | 6.26133700  | 0.57848800  | 1.97692400  |
| H  | 4.16230500  | -3.21147800 | -4.29450200 | C                      | 2.39909900  | 3.66071300  | 1.23247000  |
| B  | 4.03976500  | -3.87471900 | -1.73267400 | H                      | 1.37367500  | 3.29047500  | 1.33455100  |
| H  | 4.38958700  | -5.01074200 | -1.79020200 | H                      | 2.35974200  | 4.61362000  | 0.69056500  |
| B  | 4.48420000  | -2.83438600 | -0.35230100 | H                      | 2.77191500  | 3.86854200  | 2.24203700  |
| H  | 5.08504400  | -3.14447800 | 0.62391200  | C                      | 3.53861000  | 1.43112500  | 3.77846500  |
| Si | -1.09417200 | -0.90222300 | 2.37887100  | H                      | 4.12955700  | 2.34151200  | 3.63809100  |
| C  | -2.72112600 | -1.22401600 | 3.26202700  | H                      | 3.84707100  | 0.98914000  | 4.73452800  |
| H  | -3.29175000 | -0.30442400 | 3.41758800  | B                      | 2.48857900  | 1.72814000  | 3.87450100  |
| H  | -3.35908500 | -1.93199900 | 2.72889600  | B                      | 2.40396300  | -0.18291800 | -0.02574500 |
| H  | -2.49296800 | -1.64660200 | 4.24926800  | C                      | 5.30950200  | 2.87775000  | 0.88371100  |
|    |             |             |             | H                      | 5.50606500  | 2.86738100  | 1.95923300  |



|    |             |             |             |                        |             |             |             |
|----|-------------|-------------|-------------|------------------------|-------------|-------------|-------------|
| H  | 3.53976500  | -3.45492300 | 3.34428400  | Si                     | 0.55665700  | -2.25530000 | -0.66181400 |
| H  | 4.22492400  | -3.74338700 | 1.74174900  | C                      | -0.49527400 | -2.17665900 | -2.21515200 |
| C  | 5.90085000  | -2.50316200 | -0.06732600 | H                      | -1.47944700 | -1.74939200 | -2.03137200 |
| H  | 6.21425800  | -2.57676500 | 0.97697900  | H                      | 0.01029800  | -1.57171500 | -2.97576500 |
| H  | 6.80919900  | -2.54592800 | -0.68284100 | H                      | -0.62533400 | -3.18879300 | -2.61715800 |
| H  | 5.30444400  | -3.38891900 | -0.31201500 | C                      | -0.30386600 | -3.09976900 | 0.78076800  |
| B  | 2.32363400  | -0.06787500 | -0.13692500 | H                      | -0.45418700 | -4.16695500 | 0.57843000  |
| C  | 5.04491000  | -0.67814100 | -2.95315700 | H                      | 0.28903800  | -3.01246900 | 1.69731500  |
| H  | 5.98857500  | -1.07754300 | 2.57185800  | H                      | -1.27996200 | -2.65799400 | 0.98148400  |
| H  | 4.98557400  | -0.93616800 | 4.01816900  | C                      | 2.08079600  | -3.25548800 | -1.12668200 |
| H  | 5.08698000  | 0.41470100  | 2.88056200  | H                      | 2.54655900  | -2.86129500 | -2.03392900 |
| C  | 2.04407700  | -0.61801300 | 3.03374600  | H                      | 2.84097100  | -3.31865500 | -0.34990700 |
| H  | 2.15509700  | 0.46459100  | 3.13766600  | H                      | 1.73655300  | -4.27426700 | -1.34967100 |
| H  | 2.01252600  | -1.04432100 | 4.04380400  |                        |             |             |             |
| H  | 1.08368700  | -0.81040900 | 2.55471400  | TS7                    |             |             |             |
| B  | 1.78046300  | 1.26688600  | -2.48702000 | SCF Done: -3032.369864 |             |             |             |
| H  | 1.70718000  | 0.18937000  | -2.96785700 | Si                     | 5.23152700  | -0.17811500 | -1.27747100 |
| B  | 1.81400600  | 4.08374600  | -0.60589800 | Si                     | 3.54800600  | -2.49576900 | -0.02227100 |
| H  | 1.80069600  | 5.05601200  | 0.07638300  | N                      | 3.67694700  | -0.75440900 | -0.52928000 |
| B  | 3.29985500  | 2.07895000  | -2.04845700 | C                      | 1.26869300  | 1.98254700  | 0.74101000  |
| H  | 4.31941600  | 1.56111200  | -2.33992300 | C                      | 2.83302500  | 1.55179300  | 0.61499400  |
| B  | 0.29145500  | 3.23313100  | -1.04858600 | C                      | 4.85954800  | 1.25623700  | -2.44037400 |
| H  | -0.80216700 | 3.50408300  | -0.70257300 | H                      | 4.29516600  | 0.90051700  | -3.30874800 |
| B  | 2.17714800  | 2.82925000  | -3.19711000 | H                      | 5.81061500  | 1.66212600  | -2.80755200 |
| H  | 2.42972800  | 2.89788500  | -4.35647400 | H                      | 4.30975600  | 2.08520100  | -1.99238800 |
| B  | 3.10226600  | 2.85201300  | -0.46522900 | C                      | 6.49872300  | 0.28527200  | 0.03315200  |
| C  | 3.97169400  | 2.82583600  | 0.34020700  | H                      | 6.14962800  | 1.08967500  | 0.68479300  |
| B  | 1.46958800  | 2.52437800  | 0.09712000  | H                      | 7.41955400  | 0.62771400  | -0.45565600 |
| H  | 1.22015000  | 2.20655400  | 1.19832800  | H                      | 6.75535100  | -0.57155900 | 0.66384800  |
| B  | 2.97532300  | 3.82416500  | -1.94233800 | C                      | 3.31668300  | -3.69074000 | -1.45758100 |
| H  | 3.81029700  | 4.62246300  | -2.22162100 | H                      | 2.36997600  | -3.53784100 | -1.98065500 |
| B  | 1.24334900  | 4.06474900  | -2.30159500 | H                      | 3.30016000  | -4.70790500 | -1.04484200 |
| H  | 0.81604500  | 5.04287800  | -2.82483300 | H                      | 4.12424000  | -3.64843100 | -2.19301000 |
| B  | 0.52516900  | 2.49017700  | -2.65186900 | C                      | 5.92180800  | -1.54147100 | -2.38208800 |
| H  | -0.38798000 | 2.27762300  | -3.35965900 | H                      | 6.21547100  | -2.45483200 | -1.85856700 |
| N  | 0.95941800  | -0.54775500 | -0.18725600 | H                      | 6.81941800  | -1.14198400 | -2.87130300 |
| N  | -0.02122500 | 0.42879300  | -0.69954300 | H                      | 5.21102200  | -1.80736400 | -3.17172200 |
| N  | -1.14896600 | 0.63233200  | 0.09804600  | B                      | 2.70621400  | 0.18267600  | -0.19197500 |
| Si | -4.16346100 | -2.25695800 | -0.18166600 | C                      | 5.12292200  | -2.93167100 | 0.92046000  |
| Si | -3.89633500 | -0.00652800 | -2.24883300 | H                      | 6.03103800  | -2.94845900 | 0.31125900  |
| N  | -3.29579400 | -0.78289100 | -0.73812300 | H                      | 4.99411400  | -3.93604900 | 1.34387000  |
| C  | -2.81223300 | 0.67558600  | 1.56022700  | H                      | 5.28307400  | -2.24178800 | 1.75643000  |
| C  | -1.36268100 | 1.37134900  | 1.41954400  | C                      | 2.12988900  | -2.62862100 | 1.18995000  |
| C  | -3.95952000 | -2.60282200 | 1.65857500  | H                      | 2.39227300  | -2.16702400 | 2.14738200  |
| H  | -4.15892700 | -3.67096100 | 1.81335800  | H                      | 1.90150700  | -3.68219700 | 1.38817100  |
| H  | -4.69747800 | -2.04247300 | 2.23798000  | H                      | 1.20129800  | -2.16834500 | 0.85026600  |
| H  | -2.97725700 | -2.39129800 | 2.08538500  | B                      | 2.28166100  | 2.97647600  | -0.22921700 |
| C  | -6.02825600 | -2.11633200 | -0.44739100 | H                      | 2.14832800  | 2.87864800  | -1.40025800 |
| H  | -6.43755100 | -1.27078900 | 0.11670900  | B                      | 2.41777800  | 2.59630400  | 3.15185800  |
| H  | -6.49581700 | -3.02926000 | -0.05665200 | H                      | 2.45541900  | 2.44534300  | 4.32823800  |
| C  | -6.33697400 | -2.01103800 | -1.49090000 | H                      | 3.82948500  | 2.94039500  | 0.65119100  |
| H  | -2.56573000 | 1.11496800  | -2.91203900 | B                      | 4.82856600  | 2.94384600  | 0.01975300  |
| H  | -2.33912300 | 1.93892300  | -2.23123800 | B                      | 0.85234400  | 2.61199000  | 2.27182900  |
| H  | -2.87454300 | 1.55056000  | -3.86973300 | H                      | -0.21648000 | 2.37499100  | 2.71003400  |
| H  | -1.64382000 | 0.55354700  | -3.07671800 | B                      | 2.69236400  | 4.31569500  | 0.81702400  |
| C  | -3.49570000 | -3.74376100 | -1.13347400 | H                      | 2.93539100  | 5.37602300  | 0.34146800  |
| H  | -3.57273500 | -3.62915300 | -2.21785500 | B                      | 3.66393400  | 1.88782900  | 2.07161300  |
| H  | -4.06384700 | -4.63813000 | -0.84787800 | H                      | 4.54424100  | 1.16220800  | 2.39074600  |
| H  | -2.44452300 | -3.92625300 | -0.89184200 | B                      | 2.01298400  | 1.24926300  | 2.12208400  |
| B  | -2.48468300 | -0.01022100 | 0.12374600  | H                      | 1.69963000  | 0.13250900  | 2.33563300  |
| H  | -4.26382200 | -1.29925300 | -3.57462900 | B                      | 3.54822500  | 3.65779500  | 2.25265100  |
| C  | -3.35222700 | -1.84030400 | -3.85207400 | H                      | 4.40577300  | 4.26933300  | 2.80071900  |
| H  | -4.61904800 | -0.77308100 | -4.46983400 | B                      | 1.82104300  | 4.10203000  | 2.36936600  |
| H  | -5.02721000 | -2.03364000 | -3.30375700 | H                      | 1.44119400  | 5.02639500  | 3.00997800  |
| C  | -5.42807400 | 1.02093600  | -1.85416200 | B                      | 1.02346500  | 3.66544000  | 0.83963100  |
| H  | -6.30330100 | 0.41781400  | -1.59776500 | H                      | 0.05825600  | 4.11761300  | 0.32555400  |
| H  | -5.69010100 | 1.64010400  | -2.72148000 | N                      | 1.16434200  | 0.11735500  | -0.50362600 |
| H  | -5.22870100 | 1.69642200  | -1.01376900 | N                      | 0.48016200  | 1.09804800  | -0.07388400 |
| B  | -2.78240400 | 2.35599700  | 1.11201300  | N                      | -1.52260600 | -0.71235400 | -0.04112600 |
| H  | -2.99993300 | 2.61018900  | -0.02154400 | Si                     | -4.72369900 | -0.22245100 | -2.05242200 |
| B  | -1.89334700 | 1.08803600  | 4.12792900  | Si                     | -3.87962000 | 2.33533800  | -0.54115400 |
| H  | -1.57167900 | 0.63962300  | 5.18066200  | N                      | -3.66001800 | 0.61369700  | -0.90346900 |
| H  | -1.39784000 | 3.00038300  | 1.99765400  | C                      | -3.26084800 | -0.96890600 | 1.41657500  |
| B  | -0.71256200 | 3.83364300  | 1.52460800  | C                      | -1.72336200 | -1.46785800 | 1.19614300  |
| B  | -3.25982500 | 0.41970800  | 3.19533100  | C                      | -3.85804500 | -1.71339600 | -2.82385900 |
| H  | -3.89473100 | -0.52819100 | 3.49750400  | H                      | -4.50113700 | -2.12666600 | -3.61138300 |
| B  | -3.08932400 | 3.23381400  | 2.57737800  | H                      | -3.66985400 | -2.51171000 | -2.10204200 |
| H  | -3.60758900 | 4.30206200  | 2.52815700  | H                      | -2.90473300 | -1.43687700 | -3.28432500 |
| B  | -0.66250300 | 1.67380000  | 2.95182200  | C                      | -6.29254300 | -0.80976600 | -1.18472600 |
| H  | 0.50152500  | 1.64683400  | 3.10941200  | H                      | -6.05002000 | -1.50022300 | -0.36884400 |
| B  | -1.58371100 | 0.18948100  | 2.67038500  | H                      | -6.96167300 | -1.33161600 | -1.88045000 |
| H  | -1.08810300 | -0.86389100 | 2.48095600  | C                      | -6.84525900 | 0.03090400  | -0.75094700 |
| H  | -1.77768600 | 2.82793500  | 3.72341200  | H                      | -3.16520700 | 3.39859800  | -1.93265900 |
| B  | -1.36110100 | 3.62208500  | 4.50370000  | H                      | -2.09389300 | 3.19768700  | -2.07687000 |
| B  | -3.38259300 | 2.05154300  | 3.88063700  | H                      | -3.28148800 | 4.46272700  | -1.69050000 |
| H  | -4.12485800 | 2.28475700  | 4.77909400  | H                      | -3.64528500 | 3.22104500  | -2.89956200 |
| B  | -3.98784600 | 1.72154600  | 2.23167800  | C                      | -5.16992000 | 0.91936200  | -3.49379900 |
| H  | -5.10903300 | 1.62905000  | 1.85291700  | H                      | -5.68087700 | 1.84048000  | -3.19807600 |

|    |             |             |             |                        |             |             |             |
|----|-------------|-------------|-------------|------------------------|-------------|-------------|-------------|
| H  | -5.84072000 | 0.37681300  | -4.17198800 | H                      | 1.56278400  | 2.58825800  | -0.28985900 |
| H  | -4.27597200 | 1.19563600  | -4.06480600 | B                      | 2.21573700  | 0.36490100  | -1.39971800 |
| B  | -2.85963100 | -0.19872400 | -0.01683300 | H                      | 1.62393700  | 0.42092800  | -2.42289100 |
| C  | -5.70573500 | 2.75237100  | -0.27448000 | B                      | 3.59413400  | 1.34713400  | 0.91512600  |
| H  | -6.33701700 | 2.54055400  | -1.14360300 | H                      | 4.10661500  | 2.27116900  | 1.45859000  |
| H  | -5.81351800 | 3.81906200  | -0.04033000 | B                      | 4.52963400  | -0.02368600 | 0.25661900  |
| H  | -6.10449700 | 2.18339500  | 0.57376400  | H                      | 5.71391400  | -0.08000300 | 0.33408700  |
| C  | -2.95379400 | 2.80107100  | 1.02971200  | B                      | 3.53211100  | -1.49110500 | 0.38862700  |
| H  | -3.35041100 | 2.29933100  | 1.91751600  | H                      | 3.86054500  | -2.62539500 | 0.48095400  |
| H  | -3.03985200 | 3.88367600  | 1.18656400  | N                      | 0.04709300  | -1.80958900 | -0.97638900 |
| H  | -1.89034800 | 2.55978200  | 0.95027400  | N                      | 1.24291900  | -2.11394800 | -1.15444700 |
| B  | -2.05762900 | -0.35992600 | 2.49528000  |                        |             |             |             |
| H  | -1.67417700 | 0.74024200  | 2.33529200  |                        |             |             |             |
| B  | -3.12835900 | -3.56181700 | 2.39674500  | 4                      |             |             |             |
| H  | -3.50089000 | -4.69094000 | 2.34638500  | SCF Done: -1693.542194 |             |             |             |
| B  | -0.93042700 | -1.69156900 | 2.70209800  | Si                     | -2.40162100 | -1.09327600 | -1.37037800 |
| H  | 0.22248800  | -1.45705900 | 2.81738600  | Si                     | -2.34384800 | -0.03064000 | 1.56372900  |
| B  | -4.24595900 | -2.17787900 | 2.12584600  | N                      | -1.57904900 | -0.24528000 | -0.03465400 |
| H  | -5.38715300 | -2.26237700 | 1.80920700  | C                      | 1.10597100  | -1.16834300 | -0.02621800 |
| B  | -2.17969200 | -1.30606200 | 3.94498500  | C                      | 1.92864900  | 0.22211100  | 0.05705300  |
| H  | -1.87156500 | -0.83436400 | 4.99339600  | C                      | -1.17008100 | -1.38404700 | -2.76667200 |
| B  | -1.51003900 | -3.08079900 | 1.74154200  | H                      | -0.71944900 | -0.44904300 | -3.11844600 |
| H  | -0.74854000 | -3.80141200 | 1.18544100  | H                      | -1.70075600 | -1.83097200 | -3.61658600 |
| B  | -3.01332200 | -2.61502900 | 0.94742400  | H                      | -0.36043700 | -2.06467600 | -2.48834400 |
| H  | -3.24038600 | -2.90962300 | -0.17296800 | C                      | -3.08595800 | -2.75529700 | -0.79325600 |
| B  | -1.83465800 | -3.00308100 | 3.49499200  | H                      | -2.28204800 | -3.38137100 | -0.38869300 |
| H  | -1.29080300 | -3.74831100 | 4.24794800  | H                      | -3.54075200 | -3.29430600 | -1.63359400 |
| B  | -3.52764800 | -2.45309400 | 3.73780000  | H                      | -3.85128700 | -2.65031500 | -0.01617000 |
| H  | -4.18694200 | -2.81118200 | 4.66111200  | C                      | -4.19671400 | 0.27147200  | 1.37665900  |
| B  | -3.66464600 | -0.79752900 | 3.06969500  | H                      | -4.40321400 | 1.15907400  | 0.76892500  |
| H  | -4.40510900 | 0.07026200  | 3.40130200  | H                      | -4.62394600 | 0.44300900  | 2.37264800  |
| Si | 0.18523500  | -0.79876800 | -1.91220900 | H                      | -4.73038500 | -0.57641400 | 0.93516700  |
| C  | -0.89424600 | 0.47525900  | -2.76216800 | C                      | -3.78353200 | -0.00454300 | -2.05620900 |
| H  | -1.84089700 | 0.67773700  | -2.26938900 | H                      | -4.64537000 | 0.07274000  | -1.38743000 |
| H  | -0.32851600 | 1.41196000  | -2.83988900 | H                      | -4.13799900 | -0.41725200 | -3.00916800 |
| H  | -1.08213700 | 0.13266100  | -3.78801600 | H                      | -3.41474300 | 1.00997100  | -2.24788600 |
| C  | -0.23363400 | -2.62653200 | -1.79456000 | B                      | -0.16891300 | -0.10885700 | -0.09806300 |
| H  | 0.14011500  | -3.15904400 | -2.67741600 | C                      | -2.05542500 | -1.58668900 | 2.59131400  |
| H  | 0.19229400  | -3.09634200 | -0.90492600 | H                      | -2.51795800 | -2.46398600 | 2.12549300  |
| H  | -1.31643800 | -2.74048900 | -1.72422500 | H                      | -2.47569600 | -1.47925600 | 3.59908600  |
| C  | 1.68752800  | -0.75596900 | -3.11566500 | H                      | -0.98459700 | -1.79565400 | 2.69612000  |
| H  | 2.08165300  | 0.25852800  | -3.24863300 | C                      | -1.60581200 | 1.44909600  | 2.47001800  |
| H  | 2.51968700  | -1.40761200 | -2.84364800 | H                      | -0.51590100 | 1.39875700  | 2.53697100  |
| H  | 1.31147400  | -1.08205100 | -4.09505700 | H                      | -2.00204400 | 1.47353700  | 3.49282300  |
|    |             |             |             | H                      | -1.87283000 | 2.39612700  | 1.98964500  |
|    |             |             |             | B                      | 1.74406400  | -0.70554400 | 1.52400400  |
|    |             |             |             | H                      | 0.97520800  | -0.27758900 | 2.31338900  |
|    |             |             |             | B                      | 3.59466100  | -1.60361900 | -1.16652100 |
|    |             |             |             | H                      | 4.24261600  | -1.91665900 | -2.11265900 |
|    |             |             |             | B                      | 3.24157400  | 0.14752500  | 1.13651700  |
|    |             |             |             | H                      | 3.54240100  | 1.10969400  | 1.76238000  |
|    |             |             |             | B                      | 2.02307400  | -2.39261500 | -0.78906700 |
|    |             |             |             | H                      | 1.47210400  | -3.20460600 | -1.45607400 |
|    |             |             |             | B                      | 3.23064700  | -1.57247800 | 1.71496500  |
|    |             |             |             | B                      | 3.61900300  | -1.86047100 | 2.80093900  |
|    |             |             |             | H                      | 3.47650200  | 0.12247800  | -0.64397800 |
|    |             |             |             | H                      | 3.94474900  | 1.05953400  | -1.19598200 |
|    |             |             |             | B                      | 2.11111200  | -0.72946700 | -1.37817500 |
|    |             |             |             | H                      | 1.56310600  | -0.31680300 | -2.34009000 |
|    |             |             |             | B                      | 4.31593000  | -1.06498400 | 0.38562200  |
|    |             |             |             | H                      | 5.49431200  | -1.01018500 | 0.53531100  |
|    |             |             |             | B                      | 3.43045300  | -2.62724500 | 0.28842200  |
|    |             |             |             | H                      | 3.98063700  | -3.67786500 | 0.36925300  |
|    |             |             |             | B                      | 1.79889700  | -2.37495400 | 0.97297200  |
|    |             |             |             | H                      | 1.08570300  | -3.16504200 | 1.49794900  |
|    |             |             |             | Si                     | 0.62039900  | -2.77776800 | -0.42650300 |
|    |             |             |             | C                      | 1.83795400  | 3.18678600  | -1.80350100 |
|    |             |             |             | H                      | 2.87713700  | 3.12133500  | -1.46638300 |
|    |             |             |             | H                      | 1.66803500  | 4.20989900  | -2.16165000 |
|    |             |             |             | H                      | 1.72013200  | 2.50726900  | -2.65500800 |
|    |             |             |             | C                      | -1.14172100 | 3.08713600  | -1.01119200 |
|    |             |             |             | H                      | -1.32899000 | 2.55375100  | -1.95029900 |
|    |             |             |             | H                      | -1.30200300 | 4.15642300  | -1.19431700 |
|    |             |             |             | H                      | -1.88660800 | 2.74747200  | -0.28706900 |
|    |             |             |             | H                      | 1.06527800  | 3.75054300  | 1.12176700  |
|    |             |             |             | H                      | 0.33158100  | 3.60490200  | 1.92065900  |
|    |             |             |             | H                      | 1.12544900  | 4.82431700  | 0.90550200  |
|    |             |             |             | H                      | 2.04359300  | 3.43370300  | 1.50337800  |
|    |             |             |             | N                      | 0.71913100  | 1.03620600  | -0.08359400 |

#### Int5

|                        |             |             |             |                        |             |             |             |
|------------------------|-------------|-------------|-------------|------------------------|-------------|-------------|-------------|
| SCF Done: -1338.891533 |             |             |             |                        |             |             |             |
| Si                     | -2.73695100 | -1.29079100 | 0.21394400  | H                      | 4.24261600  | -1.91665900 | -2.11265900 |
| Si                     | -1.84014300 | 1.77318000  | -0.11704900 | B                      | 3.24157400  | 0.14752500  | 1.13651700  |
| N                      | -1.47751000 | 0.00471500  | -0.02364700 | H                      | 3.54240100  | 1.10969400  | 1.76238000  |
| C                      | 2.16909600  | -1.12449300 | -0.55452800 | B                      | 2.02307400  | -2.39261500 | -0.78906700 |
| C                      | 1.27512900  | 0.12139200  | 0.03415200  | H                      | 1.47210400  | -3.20460600 | -1.45607400 |
| C                      | -1.94952000 | -2.75478400 | 1.10323900  | B                      | 3.23064700  | -1.57247800 | 1.71496500  |
| H                      | -1.23875800 | -3.29792800 | 0.47601900  | B                      | 3.61900300  | -1.86047100 | 2.80093900  |
| H                      | -2.73875800 | -3.45403300 | 1.40716600  | B                      | 3.47650200  | 0.12247800  | -0.64397800 |
| H                      | -1.43183400 | -2.43085800 | 2.01454300  | H                      | 3.94474900  | 1.05953400  | -1.19598200 |
| C                      | -4.08621600 | -0.65447500 | 1.37615200  | B                      | 2.11111200  | -0.72946700 | -1.37817500 |
| H                      | -3.68741800 | -0.00714500 | 2.16575300  | H                      | 1.56310600  | -0.31680300 | -2.34009000 |
| H                      | -4.53898900 | -1.52378100 | 1.86884300  | B                      | 4.31593000  | -1.06498400 | 0.38562200  |
| H                      | -4.88461800 | -0.11486700 | 0.86161900  | H                      | 5.49431200  | -1.01018500 | 0.53531100  |
| C                      | -3.69230400 | 2.09014600  | -0.29226500 | B                      | 3.43045300  | -2.62724500 | 0.28842200  |
| H                      | -4.17997200 | 1.41696500  | -1.00567000 | H                      | 3.98063700  | -3.67786500 | 0.36925300  |
| H                      | -3.80278900 | 3.10942400  | -0.68438700 | B                      | 1.79889700  | -2.37495400 | 0.97297200  |
| -4.23445200            | 2.04284600  | 0.65536200  |             | H                      | 1.08570300  | -3.16504200 | 1.49794900  |
| C                      | -3.44477000 | -1.77567800 | -1.45809300 | Si                     | 0.62039900  | -2.77776800 | -0.42650300 |
| H                      | -3.89512500 | -0.91742100 | -1.97077300 | C                      | 1.83795400  | 3.18678600  | -1.80350100 |
| H                      | -4.21884800 | -2.54543500 | -1.35103300 | H                      | 2.87713700  | 3.12133500  | -1.46638300 |
| H                      | -2.64798500 | -2.17589500 | -2.09363500 | H                      | 1.66803500  | 4.20989900  | -2.16165000 |
| B                      | -0.18700600 | -0.45343000 | -0.27328600 | H                      | 1.72013200  | 2.50726900  | -2.65500800 |
| -1.22462700            | 2.67044800  | 1.41594500  |             | C                      | -1.14172100 | 3.08713600  | -1.01119200 |
| H                      | -1.60302100 | 2.18799500  | 2.32494000  | H                      | -1.32899000 | 2.55375100  | -1.95029900 |
| H                      | -1.59279500 | 3.70406200  | 1.40889100  | H                      | -1.30200300 | 4.15642300  | -1.19431700 |
| H                      | -0.13485100 | 2.70319700  | 1.48144500  | H                      | -1.88660800 | 2.74747200  | -0.28706900 |
| C                      | -1.07142600 | 2.41051100  | -1.71601000 | H                      | 1.06527800  | 3.75054300  | 1.12176700  |
| H                      | -0.01284000 | 2.17063400  | -1.83258800 | H                      | 0.33158100  | 3.60490200  | 1.92065900  |
| H                      | -1.17034100 | 3.50183500  | -1.77016300 | H                      | 1.12544900  | 4.82431700  | 0.90550200  |
| H                      | -1.60798500 | 1.98680800  | -2.57376900 | H                      | 2.04359300  | 3.43370300  | 1.50337800  |
| B                      | 1.98886000  | -1.00600700 | 1.15159700  | N                      | 0.71913100  | 1.03620600  | -0.08359400 |
| H                      | 1.25663600  | -1.78456700 | 1.66087800  |                        |             |             |             |
| B                      | 3.70562200  | 1.11675100  | -0.85970700 | TS8                    |             |             |             |
| H                      | 4.29119500  | 1.86185700  | -1.57625000 | SCF Done: -1338.850684 |             |             |             |
| B                      | 2.00818200  | 0.73837200  | 1.45673100  | Si                     | -2.44062900 | -1.38015500 | 0.51883900  |
| H                      | 1.30926800  | 1.16064100  | 2.31487100  | Si                     | -2.10812300 | -1.73536200 | -0.25397200 |
| B                      | 3.67192300  | -0.64722900 | -1.17492600 | N                      | -1.42525400 | 0.04109100  | -0.05999600 |
| H                      | 4.09828400  | -1.21901500 | -2.12059700 | C                      | 2.52045700  | -0.75470400 | -1.05911500 |
| B                      | 3.47545700  | -0.26143600 | 1.69307000  | C                      | 1.35631700  | -0.06339000 | -0.08706100 |
| H                      | 3.89701000  | -0.49526200 | 2.77898600  | C                      | -1.26852300 | -2.72116000 | 1.10965600  |
| B                      | 2.15351000  | 1.58071400  | -0.09973800 | H                      | -0.69726800 | -3.17465400 | 0.29462400  |



|   |             |            |             |
|---|-------------|------------|-------------|
| H | 4.24638100  | 1.62955700 | -2.06883600 |
| C | 1.50050200  | 2.90023000 | -0.73508800 |
| H | 1.35584100  | 2.70641500 | -1.80101400 |
| H | 1.85343300  | 3.93375100 | -0.62343600 |
| H | 0.53089800  | 2.83173800 | -0.23662500 |
| C | 3.18636900  | 2.27434500 | 1.77582400  |
| H | 2.34287200  | 2.08759000 | 2.44704700  |
| H | 3.41076000  | 3.34761700 | 1.81297900  |
| H | 4.05288200  | 1.73600000 | 2.17158800  |
| N | -0.42284100 | 0.77624100 | -1.92377700 |
| N | -1.26657800 | 1.57939900 | -2.32231700 |
| N | -1.96281100 | 2.35170200 | -2.78368900 |

TS10

SCF Done: -1802.94464

|    |             |             |             |
|----|-------------|-------------|-------------|
| Si | -2.61840000 | -1.04168000 | -1.23143600 |
| Si | -2.40040100 | 0.40980400  | 1.57068900  |
| N  | -1.72752100 | -0.06458200 | -0.02209000 |
| C  | 0.80064400  | -1.07561600 | -0.02045000 |
| C  | 2.18955800  | -0.16948300 | -0.01402600 |
| C  | -1.60603200 | -1.05554500 | -2.82323900 |
| H  | -1.46818400 | -0.03629900 | -3.20559800 |
| H  | -2.16212000 | -1.61311700 | -3.58719300 |
| H  | -0.62288800 | -1.51931600 | -2.73289900 |
| C  | -2.94459300 | -2.77200500 | -0.56614600 |
| H  | -2.01401800 | -3.25643700 | -0.25320700 |
| H  | -3.41998700 | -3.40479900 | -1.32555400 |
| H  | -3.61332200 | -2.73795200 | 0.30266000  |
| C  | -4.24524100 | 0.77772100  | 1.45523800  |
| H  | -4.48739000 | 1.50711300  | 0.67611400  |
| H  | -4.56209000 | 1.19791000  | 2.41816700  |
| H  | -4.84497800 | -0.12153800 | 1.28160200  |
| C  | -4.24634700 | -0.20012800 | -1.69263900 |
| H  | -5.04392700 | -0.33795000 | -0.95884600 |
| H  | -4.59186200 | -0.63041700 | -2.64120000 |
| H  | -4.11157100 | 0.87612700  | -1.85117000 |
| B  | -0.30265800 | 0.02573400  | -0.15898100 |
| C  | -2.14107100 | -0.96925000 | 2.82671700  |
| H  | -2.53531200 | -1.92501100 | 2.46430500  |
| H  | -2.65381900 | -0.72625800 | 3.76609300  |
| H  | -1.07974400 | -1.11565200 | 3.05000800  |
| C  | -1.52374900 | 1.96307600  | 2.18793200  |
| H  | -0.44690800 | 1.81163900  | 2.30296400  |
| H  | -1.92586200 | 2.22631900  | 3.17394900  |
| H  | -1.67787600 | 2.82511700  | 1.52928400  |
| B  | 1.60528900  | -0.82766600 | 1.45781600  |
| H  | 1.11553100  | -0.09525800 | 2.25212300  |
| B  | 2.75836300  | -2.65212000 | -1.13774000 |
| H  | 3.14654100  | -3.26508100 | -2.08042400 |
| B  | 3.32721700  | -0.87262100 | 1.05805900  |
| H  | 4.08178600  | -0.18001000 | 1.65587700  |
| B  | 1.03149100  | -2.61379600 | -0.71740600 |
| H  | 0.15086400  | -3.10134300 | -1.34314000 |
| B  | 2.51525100  | -2.31800200 | 1.73554800  |
| H  | 2.73395500  | -2.68519700 | 2.84568700  |
| B  | 3.47765800  | -1.07842000 | -0.69002600 |
| H  | 4.32820600  | -0.52613700 | -1.30281200 |
| B  | 1.85261200  | -1.15187500 | -1.36772800 |
| H  | 1.51753800  | -0.63049400 | -2.37769900 |
| B  | 3.68718200  | -2.48409400 | 0.38751800  |
| H  | 4.75667800  | -2.98342800 | 0.53854600  |
| B  | 2.17132500  | -3.42872900 | 0.37060300  |
| H  | 2.15566600  | -4.61085100 | 0.50666800  |
| B  | 0.88070900  | -2.41157000 | 1.03766000  |
| H  | -0.11025300 | -2.74944300 | 1.59364000  |
| Si | 1.91977200  | 2.33282600  | -0.20994000 |
| C  | 3.22093200  | 2.20231800  | -1.56453400 |
| H  | 4.13678400  | 1.73243300  | -1.19791000 |
| H  | 3.46589300  | 3.19965700  | -1.94706900 |
| C  | 2.85912600  | 1.59375100  | -2.40007300 |
| C  | 1.18564800  | 4.08424900  | -0.49199800 |
| H  | 0.86607200  | 4.29064900  | -1.52007200 |
| H  | 2.00426500  | 4.78328000  | -0.27617300 |
| H  | 0.36211000  | 4.34685200  | 0.18363900  |
| C  | 2.51123200  | 2.48506700  | 1.57298300  |
| H  | 1.66439100  | 2.46389500  | 2.26717500  |
| H  | 2.99065600  | 3.46584300  | 1.68112500  |
| H  | 3.21972800  | 1.71711900  | 1.88093900  |
| N  | 0.37645800  | 1.29889700  | -0.45237100 |
| N  | -0.87325100 | 2.17969100  | -0.97703000 |
| N  | -1.35073900 | 2.84947400  | -1.73072900 |

|    |             |             |             |
|----|-------------|-------------|-------------|
| C  | -2.17409800 | -0.61447500 | 0.90704300  |
| C  | -0.92798200 | 2.68380700  | -2.37494800 |
| H  | -1.91773100 | 2.21864400  | -2.42251600 |
| H  | -0.64610500 | 2.97942000  | -3.39377100 |
| H  | -1.01468700 | 3.59411100  | -1.77272000 |
| C  | 2.04764900  | 2.31260400  | -1.74431300 |
| H  | 2.07176800  | 3.26101900  | -1.19599100 |
| H  | 2.30418200  | 2.53407400  | -2.78778000 |
| H  | 2.83807600  | 1.67302100  | -1.33469400 |
| C  | 2.17276000  | 2.08694700  | 1.78725800  |
| H  | 2.56567500  | 1.08538500  | 1.99531700  |
| H  | 2.34403700  | 2.70043100  | 2.68111200  |
| H  | 2.76261500  | 2.52028400  | 0.97370200  |
| C  | 0.36984100  | -0.04755500 | -2.78970100 |
| H  | 0.87186600  | -0.90871600 | -2.33724200 |
| H  | 0.88848400  | 0.18620400  | -3.72793800 |
| B  | -0.64843700 | -0.36103400 | -3.03898900 |
| B  | -0.77191900 | -0.22549900 | -0.15077800 |
| C  | -0.27728500 | 3.79487400  | 1.06732700  |
| H  | 0.26447000  | 4.27356000  | 0.24337900  |
| H  | -0.13531100 | 4.41739200  | 1.95931300  |
| H  | -1.34410100 | 3.80193600  | 0.81776400  |
| C  | -0.54476300 | 1.35484500  | 2.93082600  |
| H  | -1.63379700 | 1.40455700  | 2.84719400  |
| H  | -0.24306400 | 1.94883900  | 3.80266900  |
| H  | -0.27857700 | 0.31105200  | 3.13180000  |
| B  | -2.99444100 | 0.59332400  | -0.05045300 |
| H  | -2.51405400 | 1.66744900  | -0.10855800 |
| B  | -3.92661500 | -2.65352600 | 0.17682800  |
| H  | -4.24406800 | -3.79717900 | 0.26101300  |
| B  | -3.72495900 | -0.03419700 | 1.41185400  |
| H  | -3.82560400 | 0.67002100  | 2.36213200  |
| B  | -3.07013800 | -2.02086600 | -1.28705600 |
| H  | -2.71711200 | -2.65544200 | -2.22636300 |
| B  | -4.65218500 | 0.12582300  | -0.13331200 |
| H  | -5.48192900 | 0.96743000  | -0.27087100 |
| B  | -3.27375700 | -1.75085600 | 1.60693500  |
| H  | -3.06763100 | -2.20138100 | 2.68552700  |
| H  | -2.25826300 | -2.23119100 | 0.25719500  |
| H  | -1.32254700 | -2.93840300 | 0.38920200  |
| B  | -4.85483200 | -1.31440200 | 0.89583500  |
| H  | -5.86733700 | -1.51190400 | 1.48978000  |
| B  | -4.72674400 | -1.47895500 | -0.90116300 |
| H  | -5.64860700 | -1.79545400 | -1.58442100 |
| B  | -3.51339400 | -0.29887300 | -1.47391100 |
| H  | -3.45913300 | -2.18926000 | -2.54172600 |
| N  | 0.39973600  | -1.47167300 | 0.41473400  |
| N  | 1.52467600  | -1.43035000 | 0.66772500  |
| N  | 2.66694600  | -1.41715800 | 1.01829500  |
| Si | 4.20584700  | -1.46532800 | 0.03956700  |
| C  | 5.13619200  | 0.08215900  | 0.52977600  |
| H  | 4.91248000  | 0.98583700  | 0.24017200  |
| H  | 5.29802700  | 0.12019900  | 1.61233800  |
| H  | 6.11729700  | 0.10265900  | 0.03956200  |
| C  | 5.05764200  | -3.03528800 | 0.60250300  |
| H  | 6.03730800  | -3.13155200 | 0.11859500  |
| H  | 5.21621400  | -3.03061400 | 1.68634400  |
| H  | 4.46816400  | -3.92316200 | 0.34881400  |
| C  | 3.72803800  | -1.50041700 | -1.77304500 |
| H  | 3.06480300  | -2.34150800 | -2.00521700 |
| H  | 3.22743600  | -0.57742200 | -2.08100800 |
| H  | 4.62858000  | -1.61216900 | -2.38969500 |

TS11

SCF Done: -1802.934687

|    |             |             |             |
|----|-------------|-------------|-------------|
| Si | -0.82799600 | 2.56204500  | -1.16474000 |
| Si | 0.79957400  | 1.85624200  | 1.41096500  |
| N  | -0.15582600 | 1.33718900  | -0.02478100 |
| C  | -1.91088600 | -0.73243000 | -0.36011500 |
| C  | -1.74495100 | -1.67804900 | 0.94222900  |
| C  | -2.31721900 | 3.45404800  | -0.43164600 |
| H  | -2.93427100 | 2.77633400  | 0.16394100  |
| H  | -2.94727900 | 3.85970100  | -1.23256300 |
| H  | -2.01119100 | 4.28855000  | 0.20808600  |
| C  | 0.53348200  | 3.82166200  | -1.53796700 |
| H  | 0.84022300  | 4.41262000  | -0.66921200 |
| H  | 0.15705100  | 4.52482700  | -2.29187800 |
| H  | 1.42513300  | 3.33911700  | -1.95457900 |
| C  | 2.58508900  | 2.22137000  | 0.90604800  |
| H  | 3.03572400  | 1.35072200  | 0.41758400  |
| H  | 3.18881300  | 2.44845400  | 1.79390200  |
| H  | 2.66385100  | 3.06845600  | 0.21826100  |
| C  | -1.22083300 | 1.70668600  | -2.79356700 |
| H  | -0.34210100 | 1.17306100  | -3.17659200 |
| H  | -1.49423200 | 2.46478200  | -3.53827500 |
| H  | -2.04610300 | 0.99618400  | -2.72595600 |
| B  | -0.51329100 | -0.01589800 | -0.17672400 |
| C  | 0.00362700  | 3.39439300  | 2.15198900  |

Int8

SCF Done: -1802.952416

|    |             |             |             |
|----|-------------|-------------|-------------|
| Si | 0.34540200  | 1.48220000  | -1.67598800 |
| Si | 0.31844300  | 2.03413000  | 1.40125000  |
| N  | -0.02237900 | 1.00567900  | -0.00482100 |
| C  | -2.06678600 | -0.77249100 | -0.66157500 |

|    |             |             |             |                        |             |             |             |
|----|-------------|-------------|-------------|------------------------|-------------|-------------|-------------|
| H  | 0.02819000  | 4.26562600  | 1.49108400  | B                      | 0.22000800  | -2.27840700 | -1.32452200 |
| H  | 0.53780400  | 3.66205100  | 3.07213700  | H                      | 0.27716000  | -1.54585800 | -2.25322200 |
| H  | -1.04120500 | 3.19887700  | 2.41672500  | B                      | 1.16895900  | -4.29119100 | 0.45907800  |
| C  | 0.79372600  | 0.49648500  | 2.72024300  | H                      | 1.91906900  | -5.19529300 | 0.64245500  |
| H  | -0.12751200 | -0.09521300 | 2.70553800  | B                      | -0.59132100 | -4.54452300 | 0.20312400  |
| H  | 0.87856300  | 0.96475500  | 3.70837300  | H                      | -1.08921000 | -5.62406500 | 0.20388100  |
| B  | 1.63675800  | -0.19559300 | 2.61965000  | H                      | -1.45689800 | -3.12612900 | 0.86423400  |
| H  | -2.75671200 | -0.29987000 | 1.07426600  | B                      | -2.56149900 | -3.07172500 | 1.29592300  |
| H  | -2.37495500 | 0.64450000  | 1.68542400  | N                      | 0.60259600  | -0.17090200 | 0.08682800  |
| B  | -3.40307700 | -2.99261800 | -0.86361000 | N                      | 1.59275000  | 0.72570400  | -0.11624500 |
| H  | -3.59361900 | -3.94458600 | -1.55300000 | N                      | 2.74398700  | 0.23411800  | -0.07075300 |
| B  | -3.22840900 | -1.83178200 | 1.77952000  | Si                     | 4.10577600  | 1.37765900  | -0.33858100 |
| B  | -3.22619700 | -1.94591000 | 2.96267500  | C                      | 5.16644300  | 1.25104300  | 1.21139200  |
| H  | -2.89684100 | -1.43702900 | -1.57797200 | H                      | 4.62293500  | 1.60868400  | 2.09359600  |
| H  | -2.64829000 | -1.23125600 | -2.72172500 | H                      | 5.46021700  | 0.21199700  | 1.39710600  |
| B  | -4.40554500 | -0.85960600 | 0.82843000  | H                      | 6.07987700  | 1.85016400  | 1.11319100  |
| H  | -5.31739600 | -0.29132000 | 1.34145500  | C                      | 5.01702300  | 0.71639300  | -1.84682700 |
| B  | -2.62521200 | -3.13692800 | 0.74420000  | H                      | 5.93399900  | 1.28739500  | -2.03668700 |
| H  | -2.20638800 | -4.14394700 | 1.21688900  | H                      | 5.29463700  | -0.33361000 | -1.70201600 |
| H  | -1.76288200 | -2.40966800 | -0.60271200 | H                      | 4.39087000  | 0.77679400  | -2.74450100 |
| B  | -0.75691700 | -2.83344800 | -1.07079000 | C                      | 3.48735500  | 3.13661400  | -0.61298300 |
| B  | -4.33462200 | -2.63700300 | 0.62298600  | H                      | 2.86692700  | 3.20382700  | -1.51338400 |
| H  | -5.21501600 | -3.34261300 | 1.00498400  | H                      | 2.88046900  | 3.47973800  | 0.23231100  |
| B  | -4.49524900 | -1.57473300 | -0.81129900 | H                      | 4.32829800  | 3.83095200  | -0.73044400 |
| H  | -5.49204200 | -1.51669300 | -1.46098200 |                        |             |             |             |
| B  | -3.50927000 | -0.12922100 | -0.53323500 |                        |             |             |             |
| H  | -3.68303400 | 0.95308200  | -0.98403600 | <b>TS12</b>            |             |             |             |
| N  | 0.54463400  | -1.07631100 | 0.07061200  | SCF Done: -1802.973712 |             |             |             |
| N  | 1.69829100  | -1.23115400 | 0.19003100  | Si                     | 0.35812100  | -2.45092900 | 1.24399300  |
| N  | 2.77363600  | -1.61187300 | 0.58058600  | Si                     | 1.63363900  | -1.49007300 | -1.47605400 |
| Si | 4.30628500  | -1.52388100 | -0.42133700 | N                      | 0.56970600  | -1.21222500 | -0.05136700 |
| C  | 5.53474500  | -0.63864100 | 0.68053700  | C                      | -2.02959300 | -0.18268600 | 0.15586000  |
| H  | 5.22347200  | 0.39152700  | 0.88303100  | C                      | -1.90709300 | 1.30422900  | -0.46748400 |
| H  | 5.64011900  | -1.15684800 | 1.64002300  | C                      | -1.04144500 | -3.63573800 | 0.82169300  |
| H  | 6.52237800  | -0.60710000 | 0.20476400  | H                      | -2.01552900 | -3.13978500 | 0.85437200  |
| C  | 4.76319100  | -3.31283200 | -0.73481100 | H                      | -1.06324900 | -4.46140800 | 1.54395400  |
| H  | 5.71335000  | -3.37865200 | -1.27880100 | H                      | -0.91725300 | -4.06679000 | -0.17787500 |
| H  | 4.87577700  | -3.85878000 | 0.20816700  | C                      | 1.96010800  | -3.42083300 | 1.46414200  |
| H  | 3.99731500  | -3.82120800 | -1.33077600 | H                      | 2.20799600  | -4.05815700 | 0.60912500  |
| C  | 3.88458000  | -0.58099000 | -1.99032200 | H                      | 1.83830000  | -4.07760800 | 2.33466700  |
| H  | 3.09249700  | -1.08433800 | -2.55713800 | H                      | 2.81309200  | -2.76375200 | 1.66287000  |
| H  | 3.55066000  | 0.43979800  | -1.77205100 | C                      | 3.45752100  | -1.66793400 | -1.01492400 |
| H  | 4.76308000  | -0.51059300 | -2.64287900 | H                      | 3.79178300  | -0.93957000 | -0.27199900 |
|    |             |             |             | H                      | 4.06104000  | -1.51547100 | -1.91879100 |
|    |             |             |             | H                      | 3.68821700  | -2.66664100 | -0.63381200 |
|    |             |             |             | C                      | 0.01045100  | -1.53832900 | 2.85357500  |
|    |             |             |             | H                      | 0.84526900  | -0.87824700 | 3.11394200  |
|    |             |             |             | H                      | -0.11531100 | -2.25884200 | 3.67116900  |
|    |             |             |             | H                      | -0.89985700 | -0.93341700 | 2.80933900  |
|    |             |             |             | B                      | -0.40185600 | -0.21167100 | -0.09690400 |
|    |             |             |             | C                      | 1.06108400  | -3.10009400 | -2.28018400 |
|    |             |             |             | H                      | 1.17012100  | -3.96483900 | -1.61622800 |
|    |             |             |             | C                      | 1.65433200  | -3.30009600 | -3.18120200 |
|    |             |             |             | H                      | 0.00841100  | -3.03733100 | -2.57937100 |
|    |             |             |             | C                      | 1.42730100  | -0.10103800 | -2.72728800 |
|    |             |             |             | H                      | 0.39682800  | -0.02388700 | -3.08702300 |
|    |             |             |             | H                      | 2.06726800  | -0.32095400 | -3.59136500 |
|    |             |             |             | H                      | 1.71806800  | 0.87704900  | -2.33652300 |
|    |             |             |             | B                      | -2.57891200 | 0.06739100  | -1.48425300 |
|    |             |             |             | H                      | -1.87373800 | -0.34291100 | -2.34215900 |
|    |             |             |             | B                      | -4.01088700 | 1.38403200  | 1.29889500  |
|    |             |             |             | H                      | -4.51002000 | 1.84627600  | 2.27322200  |
|    |             |             |             | B                      | -3.19761800 | 1.72849300  | -1.48299000 |
|    |             |             |             | H                      | -2.99989300 | 2.41682300  | -2.42673500 |
|    |             |             |             | B                      | -3.31836000 | -0.27382300 | 1.28775400  |
|    |             |             |             | H                      | -3.21442200 | -1.00203800 | 2.21812200  |
|    |             |             |             | B                      | -4.29695600 | 0.29465900  | -1.38082300 |
|    |             |             |             | H                      | -4.99404800 | -0.01539700 | -2.29202300 |
|    |             |             |             | B                      | -3.01704000 | 2.40542500  | 0.17902100  |
|    |             |             |             | H                      | -2.71184800 | 3.53908000  | 0.33009200  |
|    |             |             |             | B                      | -2.29330700 | 1.16359600  | 1.22053200  |
|    |             |             |             | H                      | -1.40987200 | 1.41365600  | 1.96870000  |
|    |             |             |             | B                      | -4.58436400 | 1.74301200  | -0.36426800 |
|    |             |             |             | H                      | -5.51474200 | 2.45761700  | -0.55620300 |
|    |             |             |             | B                      | -4.77321800 | 0.09209300  | 0.32727300  |
|    |             |             |             | H                      | -5.83224700 | -0.36115400 | 0.62044900  |
|    |             |             |             | B                      | -3.48119800 | -0.93817800 | -0.35488800 |
|    |             |             |             | H                      | -3.49944000 | -2.10928300 | -0.53565000 |
|    |             |             |             | N                      | -0.46308100 | 1.19927500  | -0.58513500 |
|    |             |             |             | N                      | 0.24298500  | 2.42401400  | -0.56450000 |
|    |             |             |             | N                      | 1.42758300  | 2.38177200  | -0.26106900 |
|    |             |             |             | Si                     | 2.96705300  | 2.25160900  | 0.50614500  |
|    |             |             |             | C                      | 4.21399100  | 1.96083800  | -0.87507600 |
|    |             |             |             | H                      | 4.23842600  | 2.82505400  | -1.54802600 |
|    |             |             |             | H                      | 5.21772400  | 1.84002800  | -0.44936100 |
|    |             |             |             | C                      | 3.99274900  | 1.07329400  | -1.47274900 |
|    |             |             |             | H                      | 2.94700000  | 0.88422100  | 1.81144400  |
|    |             |             |             | H                      | 2.60960600  | -0.06803200 | 1.39619300  |
|    |             |             |             | H                      | 3.93921800  | 0.74473100  | 2.25939700  |

**Int9**

SCF Done: -1803.005957

|    |             |             |             |
|----|-------------|-------------|-------------|
| Si | -3.47188000 | 0.67092900  | -0.63503500 |
| Si | -1.27581000 | 2.47559800  | 0.68266300  |
| N  | -1.79962200 | 0.87941100  | -0.00407500 |
| C  | -0.86238200 | -1.80414200 | -0.03759700 |
| C  | 0.74242300  | -1.62373200 | 0.18782400  |
| C  | -4.71842800 | 0.63352500  | 0.77823200  |
| H  | -4.85698500 | 1.60019400  | 1.26905600  |
| H  | -4.40703700 | -0.09256600 | 1.53876300  |
| H  | -5.69453300 | 0.31049700  | 0.39499700  |
| C  | -3.81382400 | 2.07299200  | -1.85356200 |
| H  | -3.75319600 | 3.07429500  | -1.41784700 |
| H  | -4.82084000 | 1.95537100  | -2.27290700 |
| H  | -3.10214700 | 2.02794700  | -2.68666900 |
| C  | -0.46173000 | 3.48298900  | -0.67976000 |
| H  | 0.40602700  | 2.94546200  | -1.07276200 |
| H  | -0.11629500 | 4.45189400  | -0.29858600 |
| H  | -1.15919100 | 3.67301300  | -1.50356000 |
| C  | -3.63457200 | -0.93935900 | -1.58577100 |
| H  | -2.83329000 | -1.08996000 | -2.31598300 |
| H  | -4.58408500 | -0.91571100 | -2.13549300 |
| H  | -3.65816100 | -1.81026200 | -0.92594500 |
| B  | -0.87007800 | -0.15721400 | -0.04584300 |
| C  | -2.75880900 | 3.41298100  | 1.38667400  |
| H  | -3.56520800 | 3.62579600  | 0.68032900  |
| H  | -2.38184500 | 4.37821500  | 1.74923700  |
| H  | -3.18594400 | 2.88880300  | 2.24839200  |
| C  | -0.14290100 | 2.19612300  | 2.16422400  |
| H  | -0.55612900 | 1.42948600  | 2.83032900  |
| H  | -0.07869600 | 3.12964100  | 2.73753400  |
| H  | 0.87002800  | 1.89802900  | 1.88885700  |
| B  | -0.22561700 | -2.07533200 | 1.56564700  |
| H  | -0.42955200 | -1.22120200 | 2.35967000  |
| B  | 0.43886800  | -3.99493600 | -1.15130900 |
| H  | 0.66640300  | -4.66600300 | -2.10570800 |
| B  | 1.40036900  | -2.73220900 | 1.28954000  |
| B  | 2.28103600  | -2.40180300 | 2.00831700  |
| H  | -1.17744900 | -3.26849200 | -0.88884800 |
| H  | -2.08360800 | -3.33258600 | -1.64519800 |
| B  | -0.01022500 | -3.78955400 | 1.71196100  |
| H  | -0.09206400 | -4.31076800 | 2.77699900  |
| B  | 1.67800000  | -2.86556100 | -0.48767000 |
| H  | 2.74371700  | -2.63851400 | -0.94500600 |

|                        |             |             |             |                        |             |             |             |
|------------------------|-------------|-------------|-------------|------------------------|-------------|-------------|-------------|
| H                      | 2.25628900  | 1.15610700  | 2.61917900  | H                      | 0.94906600  | 3.67082300  | -1.21321500 |
| C                      | 3.34762400  | 3.87903200  | 1.37589300  | H                      | -0.19423300 | 4.71904100  | -2.07567800 |
| H                      | 3.40025400  | 4.70446700  | 0.65772400  |                        |             |             |             |
| H                      | 2.57295400  | 4.12401500  | 2.11179900  |                        |             |             |             |
| H                      | 4.30667700  | 3.82391700  | 1.90732900  |                        |             |             |             |
| <b>Int10</b>           |             |             |             | <b>TS13</b>            |             |             |             |
| SCF Done: -1802.981466 |             |             |             | SCF Done: -1802.970254 |             |             |             |
| Si                     | -1.30214100 | -2.30418700 | -1.28848400 | Si                     | -1.93565500 | -1.93685300 | -1.25698800 |
| Si                     | -2.20124100 | -1.06182900 | 1.43809300  | Si                     | -2.49820600 | -0.39991900 | 1.39006300  |
| N                      | -1.03804400 | -1.15199900 | 0.06841500  | N                      | -1.39922800 | -0.85688800 | 0.06261700  |
| C                      | 1.74066300  | -0.77260000 | -0.19622700 | C                      | 1.39292700  | -1.27758700 | -0.05034200 |
| C                      | 1.94584700  | 0.68819900  | 0.45524800  | C                      | 1.92729100  | 0.22619000  | 0.31561600  |
| C                      | -0.76494700 | -4.03825600 | -0.78989400 | C                      | -2.04735800 | -3.72710500 | -0.67828800 |
| H                      | 0.27693000  | -4.02455100 | -0.44739000 | H                      | -1.09296900 | -4.03481200 | -0.23395500 |
| H                      | -0.82490300 | -4.72117000 | -1.64632300 | H                      | -2.24905000 | -4.39221100 | -1.52724000 |
| H                      | -1.37829700 | -4.45423700 | 0.01518000  | H                      | -2.83290400 | -3.88652500 | 0.06635400  |
| C                      | -3.11961700 | -2.22676500 | -1.80185200 | C                      | -3.59090400 | -1.29626600 | -1.91829200 |
| H                      | -3.83516700 | -2.48006500 | -1.01539500 | H                      | -4.38356400 | -1.21316800 | -1.16957000 |
| H                      | -3.28316300 | -2.92356700 | -2.63348900 | H                      | -3.95279100 | -1.96518300 | -2.70917700 |
| H                      | -3.36245900 | -1.22150200 | -2.16656500 | H                      | -3.45149400 | -0.30493900 | -2.36724400 |
| C                      | -3.58998000 | 0.15174300  | 1.04214300  | C                      | -3.39198500 | 1.22699600  | 1.01482400  |
| H                      | -3.22917400 | 1.18518300  | 1.06291500  | H                      | -2.70622200 | 2.08032200  | 0.97667400  |
| H                      | -4.38763000 | 0.07032400  | 1.79074900  | H                      | -4.13229700 | 1.43982500  | 1.79596700  |
| H                      | -4.03341400 | -0.03785200 | 0.05867400  | H                      | -3.92404000 | 1.17921400  | 0.05753700  |
| C                      | -0.32235100 | -1.75504700 | -2.79902200 | C                      | 0.22641500  | -2.29773700 | -2.50780400 |
| H                      | -0.55917500 | -0.72422600 | -3.08226800 | B                      | -0.03787300 | -0.43516800 | 0.07633100  |
| H                      | -0.59945400 | -2.39907600 | -3.64334500 | C                      | -3.80200700 | -1.74110300 | 1.67403300  |
| B                      | 0.75852400  | -1.83472500 | -2.66880500 | H                      | -4.42646400 | -1.98230200 | 0.81027800  |
| H                      | 0.14802600  | -0.40717200 | 0.04933900  | H                      | -4.46904700 | -1.39732200 | 2.47509200  |
| C                      | -2.91763000 | -2.77856000 | 1.77499900  | H                      | -3.32974500 | -2.66706800 | 2.02033100  |
| H                      | -3.47271100 | -3.23210300 | 0.94994600  | C                      | -1.58343200 | -0.27977700 | 3.03115500  |
| H                      | -3.60659300 | -2.69156500 | 2.62498700  | H                      | -1.17793000 | -1.25947500 | 3.30844200  |
| H                      | -2.12295100 | -3.47225200 | 2.07155500  | H                      | -2.29428500 | 0.01772000  | 3.81295900  |
| C                      | -1.33605200 | -0.57706900 | 3.03584200  | H                      | -0.75760500 | 0.43207200  | 3.03504100  |
| H                      | -0.63636800 | -1.36008100 | 3.34869500  | B                      | 1.93280500  | -0.99348200 | 1.56878700  |
| H                      | -2.09884000 | -0.48685600 | 3.82036800  | H                      | 1.10582600  | -0.88347600 | 2.40501400  |
| H                      | -0.79200700 | 0.36921400  | 2.99174400  | B                      | 3.91780600  | -1.01785400 | -1.16387800 |
| B                      | 2.23987800  | -0.69434500 | 1.47228300  | H                      | 4.60778700  | -1.02030800 | -2.13291300 |
| H                      | 1.40174900  | -0.91744900 | 2.27491600  | B                      | 3.24773100  | 0.17669100  | 1.40152200  |
| B                      | 4.11627700  | 0.27591600  | -1.17936600 | H                      | 3.36824900  | 1.03972600  | 2.20796600  |
| B                      | 4.76953300  | 0.61170300  | -2.11391000 | B                      | 2.53206000  | -2.14669300 | -0.98788700 |
| B                      | 3.23079200  | 0.77386400  | 1.55472700  | H                      | 2.16363300  | -2.91328100 | -1.81484000 |
| H                      | 3.15202600  | 1.47537500  | 2.50512200  | B                      | 3.55979800  | -1.58991300 | 1.65761800  |
| B                      | 3.03030300  | -1.15522900 | -1.25575200 | H                      | 3.99276400  | -1.99457500 | 2.68892500  |
| B                      | 2.83525200  | -1.82067300 | -2.21667700 | B                      | 3.48231400  | 0.52150900  | -0.33467800 |
| B                      | 3.95760700  | -0.88871900 | 1.47759700  | H                      | 3.79389900  | 1.60670200  | -0.69119000 |
| H                      | 4.50377600  | -1.36608600 | 2.41892200  | B                      | 2.28723000  | -0.41364800 | -1.25080800 |
| B                      | 3.33590200  | 1.49105000  | -0.09499900 | B                      | 1.67590400  | 0.04756900  | -2.15087000 |
| H                      | 3.32073200  | 2.66995600  | -0.22602100 | B                      | 4.53092800  | -0.65745000 | 0.48300400  |
| B                      | 2.39232700  | 0.48891500  | -1.20947800 | H                      | 5.67947100  | -0.41412600 | 0.67737900  |
| H                      | 1.65968000  | 0.95514600  | -2.01179800 | B                      | 3.95809700  | -2.30894600 | 0.07261400  |
| B                      | 4.65293900  | 0.46012600  | 0.51945700  | H                      | 4.69762500  | -3.23543800 | -0.02409000 |
| H                      | 5.71492900  | 0.92160800  | 0.78880600  | B                      | 2.30962500  | -2.49773600 | 0.73356000  |
| B                      | 4.47639700  | -1.17694300 | -0.20553500 | H                      | 1.76383900  | -3.49214300 | 1.08557700  |
| H                      | 5.40854300  | -1.87019500 | -0.45736400 | N                      | 0.61241000  | 0.85113400  | 0.30820100  |
| B                      | 2.93589500  | -1.87380000 | 0.36815900  | N                      | 0.16313100  | 2.33212100  | 1.98375900  |
| H                      | 2.64361400  | -3.01633400 | 0.50186900  | N                      | -0.15258200 | 3.16492900  | 1.29613500  |
| N                      | 0.51734200  | 0.97413300  | 0.43016600  | Si                     | -0.12213200 | 3.19833800  | -0.79993200 |
| N                      | -0.00880500 | 1.88020000  | 1.47251200  | C                      | -1.03785400 | 4.84603900  | -0.76750800 |
| N                      | -0.88098600 | 2.65601200  | 1.10635500  | H                      | -0.51603600 | 5.59590300  | -0.16317200 |
| Si                     | -1.39619000 | 3.12523100  | -0.58953300 | H                      | -1.12554600 | 5.23197100  | -1.79162000 |
| C                      | -2.99351100 | 4.06509500  | -0.28171900 | H                      | -2.05425900 | 4.73664300  | -0.37067000 |
| H                      | -2.85299100 | 4.83593200  | 0.48320400  | C                      | -1.13339600 | 2.01941200  | -1.83860900 |
| H                      | -3.34201300 | 4.55198600  | -1.20054500 | H                      | -1.80899700 | 1.40908600  | -1.23764000 |
| H                      | -3.79020100 | 3.39388700  | 0.05998200  | H                      | -1.72497300 | 2.58633900  | -2.56801800 |
| C                      | -1.67982400 | 1.75312800  | -1.84687800 | H                      | -0.45305700 | 1.33504400  | -2.35205800 |
| H                      | -2.20517600 | 0.89880700  | -1.41313400 | C                      | 1.68405000  | 3.45891100  | -1.18279300 |
| H                      | -2.28383800 | 2.13743300  | -2.67884800 | H                      | 2.28995700  | 3.53186200  | -0.27557900 |
| H                      | -0.72566300 | 1.39934300  | -2.24554600 | H                      | 2.06922100  | 2.62033800  | -1.76533800 |
| C                      | 0.02289100  | 4.24724600  | -1.10966800 | H                      | 1.80508900  | 4.38827400  | -1.75228700 |
| H                      | 0.19488700  | 5.04038000  | -0.37451000 |                        |             |             |             |



## References

- [1] Zhang, H.; Wang, J.; Yang, W.; Xiang, L.; Sun, W.; Ming, W.; Li, Y.; Lin, Z.; Ye, Q. *J. Am. Chem. Soc.* **2020**, *142*, 17243–17249.
- [2] Wang, J.; Jia, P.; Sun, W.; Wei, Y.; Lin, Z.; Ye, Q. *Inorg. Chem.* **2022**, *61*, 8879–8886.
- [3] Sheldrick, G. *Acta Cryst.* **2015**, *A71*, 3–8.
- [4] Sheldrick, G. *Acta Cryst.* **2008**, *A64*, 112–122.
- [5] Frisch, M. J.; Trucks, G. W.; Schlegel, H. B.; Scuseria, G. E.; Robb, M. A.; Cheeseman, J. R.; Scalmani, G.; Barone, V.; Mennucci, B.; Petersson, G. A.; Nakatsuji, H.; Caricato, M.; Li, X.; Hratchian, H. P.; Izmaylov, A. F.; Bloino, J.; Zheng, G.; Sonnenberg, J. L.; Hada, M.; Ehara, M.; Toyota, K.; Fukuda, R.; Hasegawa, J.; Ishida, M.; Nakajima, T.; Honda, Y.; Kitao, O.; Nakai, H.; Vreven, T.; Montgomery, Jr., J. A.; Peralta, J. E.; Ogliaro, F.; Bearpark, M.; Heyd, J. J.; Brothers, E.; Kudin, K. N.; Staroverov, V. N.; Kobayashi, R.; Normand, J.; Raghavachari, K.; Rendell, A.; Burant, J. C.; Iyengar, S. S.; Tomasi, J.; Cossi, M.; Rega, N.; Millam, J. M.; Klene, M.; Knox, J. E.; Cross, J. B.; Bakken, V.; Adamo, C.; Jaramillo, J.; Gomperts, R.; Stratmann, R. E.; Yazyev, O.; Austin, A. J.; Cammi, R.; Pomelli, C.; Ochterski, J. W.; Martin, R. L.; Morokuma, .; Zakrzewski, V. G.; Voth, G. A.; Salvador, P.; Dannenberg, J. J.; Dapprich, S.; Daniels, A. D.; Farkas, Ö.; Foresman, J. B.; Ortiz, J. V.; Cioslowski, J.; Fox, D. J. Gaussian 09, Revision D.01; Gaussian, Inc.: Wallingford, CT, **2009**.
- [6] a) Lee, C.; Yang, W.; Parr, R. G. *Phys. Rev. B* **1988**, *37*, 785–789; b) Becke, A. D. *J. Chem. Phys.* **1993**, *98*, 5648–5652.
- [7] a) Ditchfield, R.; Hehre, W. J.; Pople, J. A. *J. Chem. Phys.* **1971**, *54*, 724–728; b) Hehre, W. J.; Ditchfield, R.; Pople, J. A. *J. Chem. Phys.* **1972**, *56*, 2257–2261; c) Hariharan, P. C.; Pople, J. A. *Theor. Chim. Acta* **1973**, *28*, 213–222; d) Dill, J. D.; Pople, J. A. *J. Chem. Phys.* **1975**, *62*, 2921–2923; e) Rassolov, V. A.; Ratner, M. A.; Pople, J. A.; Redfern, P. C.; Curtiss, L. A. 6-31G\* basis set for third-row atoms. *J. Comput. Chem.* **2001**, *22*, 976–984.
- [8] Grimme, S. *Chem. Eur. J.* **2004**, *10*, 3423–3429.
- [9] a) Fukui, K. *J. Phys. Chem.* **1970**, *74*, 4161–4163; b) Fukui, K. *Acc. Chem. Res.* **1981**, *14*, 363–368.
- [10] Marenich, A. V.; Cramer, C. J.; Truhlar, D. G. *J. Phys. Chem. B.* **2009**, *113*, 6378–6396.
- [11] a) Krishnan, R.; Binkley, J. S.; Seeger, R.; Pople, J. A. *J. Chem. Phys.* **1980**, *72*, 650–654; b) McLean, A. D.; Chandler, G. S. *J. Chem. Phys.* **1980**, *72*, 5639–5648; c) Francl, M. M.; Pietro, W. J.; Hehre, W. J.; Binkley, J. S.; Gordon, M. S.; DeFrees, D. J.; Pople, J. A. *J. Chem. Phys.* **1982**, *77*, 3654–3665.
